# Supplementary material for: General practitioners’ perspectives on the prevention of cardiovascular disease: systematic review and thematic synthesis of qualitative studies
Source: PubMed Central journal article supplement — BMJ Open. 2018 Nov 1;8(11):e021137. doi: 10.1136/bmjopen-2017-021137 (PMC6224770; doi:10.1136/bmjopen-2017-021137), 2018-11-01
Supplement: bmjopen-2017-021137.draft_revisions.pdf [file bmjopen-2017-021137.draft_revisions.pdf]

# BMJ Open

BMJ Open is committed to open peer review. As part of this commitment we make the peer review history of every article we publish publicly available.

When an article is published we post the peer reviewers' comments and the authors' responses online. We also post the versions of the paper that were used during peer review. These are the versions that the peer review comments apply to.

The versions of the paper that follow are the versions that were submitted during the peer review process. They are not the versions of record or the final published versions. They should not be cited or distributed as the published version of this manuscript.

BMJ Open is an open access journal and the full, final, typeset and author-corrected version of record of the manuscript is available on our site with no access controls, subscription charges or pay-per-view fees (<http://bmjopen.bmj.com>).

If you have any questions on BMJ Open's open peer review process please email [info.bmjopen@bmj.com](mailto:info.bmjopen@bmj.com)

# BMJ Open

## General practitioners' perspectives on the prevention of cardiovascular disease: systematic review and thematic synthesis of qualitative studies

|                               |                                                                                                                                                                                                                                                                                                                                                                                                                                                                                                                                                                                                                                                                                                                                                                                                                                                                                                                                                                                                                                                                                                                                                                                                                                                                                                                                                                      |
|-------------------------------|----------------------------------------------------------------------------------------------------------------------------------------------------------------------------------------------------------------------------------------------------------------------------------------------------------------------------------------------------------------------------------------------------------------------------------------------------------------------------------------------------------------------------------------------------------------------------------------------------------------------------------------------------------------------------------------------------------------------------------------------------------------------------------------------------------------------------------------------------------------------------------------------------------------------------------------------------------------------------------------------------------------------------------------------------------------------------------------------------------------------------------------------------------------------------------------------------------------------------------------------------------------------------------------------------------------------------------------------------------------------|
| Journal:                      | <i>BMJ Open</i>                                                                                                                                                                                                                                                                                                                                                                                                                                                                                                                                                                                                                                                                                                                                                                                                                                                                                                                                                                                                                                                                                                                                                                                                                                                                                                                                                      |
| Manuscript ID                 | bmjopen-2017-021137                                                                                                                                                                                                                                                                                                                                                                                                                                                                                                                                                                                                                                                                                                                                                                                                                                                                                                                                                                                                                                                                                                                                                                                                                                                                                                                                                  |
| Article Type:                 | Research                                                                                                                                                                                                                                                                                                                                                                                                                                                                                                                                                                                                                                                                                                                                                                                                                                                                                                                                                                                                                                                                                                                                                                                                                                                                                                                                                             |
| Date Submitted by the Author: | 03-Jan-2018                                                                                                                                                                                                                                                                                                                                                                                                                                                                                                                                                                                                                                                                                                                                                                                                                                                                                                                                                                                                                                                                                                                                                                                                                                                                                                                                                          |
| Complete List of Authors:     | <p>Ju, Irene; University of Sydney School of Public Health; Children's Hospital at Westmead Centre for Kidney Research</p> <p>Banks, Emily; National Centre for Epidemiology and Population Health; Sax Institute</p> <p>Calabria, Bianca; Australian National University Medical School, National Centre for Epidemiology and Population Health; University of New South Wales, National Drug and Alcohol Research Centre</p> <p>Ju, Angela; University of Sydney School of Public Health; Children's Hospital at Westmead Centre for Kidney Research</p> <p>Agostino, Jason; Australian National University, Academic Unit of General Practice</p> <p>Korda, Rosemary; National Centre for Epidemiology and Population Health</p> <p>Usherwood, Tim; University of Sydney, Department of General Practice</p> <p>Manera, Karine; University of Sydney School of Public Health; Children's Hospital at Westmead Centre for Kidney Research</p> <p>Hanson, Camilla; University of Sydney School of Public Health; Children's Hospital at Westmead Centre for Kidney Research</p> <p>Craig, Jonathan; University of Sydney, Sydney School of Public Health; Children's Hospital at Westmead Centre for Kidney Research</p> <p>Tong, Allison; The University of Sydney, Sydney School of Public Health; Children's Hospital at Westmead Centre for Kidney Research</p> |
| Keywords:                     | GENERAL MEDICINE (see Internal Medicine), HEALTH SERVICES ADMINISTRATION & MANAGEMENT, Cardiology < INTERNAL MEDICINE                                                                                                                                                                                                                                                                                                                                                                                                                                                                                                                                                                                                                                                                                                                                                                                                                                                                                                                                                                                                                                                                                                                                                                                                                                                |
|                               |                                                                                                                                                                                                                                                                                                                                                                                                                                                                                                                                                                                                                                                                                                                                                                                                                                                                                                                                                                                                                                                                                                                                                                                                                                                                                                                                                                      |

SCHOLARONE™  
Manuscripts

1                   **General practitioners' perspectives on the prevention of cardiovascular disease: systematic**  
2  
3                   **review and thematic synthesis of qualitative studies**  
4  
5  
6  
7

8                   **Authors' names and highest degrees**  
9

10 Irene Ju<sup>1,2</sup>, Emily Banks, PhD<sup>3,4</sup>, Bianca Calabria, PhD<sup>3,5</sup>, Angela Ju, BPsych (Hons)<sup>1,2</sup>, Jason  
11 Agostino, FRACGP, BMed, MPhilAppEpi<sup>6</sup>, Rosemary J. Korda, PhD<sup>3</sup>, Tim Usherwood, MBBS, MD<sup>7</sup>,  
12 Karine Manera, MIPH<sup>1,2</sup>, Camilla S Hanson, BPsych (Hons)<sup>1,2</sup>, Jonathan C Craig, PhD<sup>1,2</sup>, Allison  
13 Tong, PhD<sup>1,2</sup>.  
14  
15  
16  
17  
18  
19  
20

21                   **Affiliations of each author:**  
22

23 <sup>1</sup>Sydney School of Public Health, The University of Sydney, Sydney, NSW 2006  
24

25 <sup>2</sup>Centre for Kidney Research, The Children's Hospital at Westmead, Westmead, NSW 2145  
26

27 <sup>3</sup>National Centre for Epidemiology and Population Health, Research School of Population Health,  
28 Australian National University, Canberra, Australia, ACT 0200  
29

30 <sup>4</sup>Sax Institute, Ultimo, NSW 2007  
31

32 <sup>5</sup>National Drug and Alcohol Research Centre, UNSW Australia, Sydney, NSW 2052  
33

34 <sup>6</sup>Academic Unit of General Practice, School of Medicine, Australian National University  
35

36 <sup>7</sup>Department of General Practice, Sydney Medical School Westmead, University of Sydney, Sydney,  
37 NSW 2006  
38  
39  
40  
41  
42  
43  
44

45                   **Corresponding author:**  
46

47 Irene Ju  
48

49 Sydney School of Public Health, The University of Sydney, Sydney NSW 2006, Australia  
50

51 Phone: +61 426 260 894      Email: [euju2374@uni.sydney.edu.au](mailto:euju2374@uni.sydney.edu.au)  
52

53 **Word count (body): 3,900**  
54  
55  
56  
57  
58  
59  
60

## ABSTRACT

**Objective:** To describe the perspectives of general practitioners (GPs) on the prevention of cardiovascular disease (CVD) across different contexts.

**Setting:** 32 studies involving 1,189 participants across nine countries

**Results:** We identified six themes: defining own primary role (duty to prescribe medication, refraining from risking patients' lives, mediating between patients and specialists, delegating responsibility to patients, providing holistic care); trusting external expertise (depending on credible evidence and opinion, entrusting care to other health professionals, integrating into patient context); motivating behaviour change for prevention (highlighting tangible improvements, negotiating patient acceptance, enabling autonomy and empowerment, harnessing the power of fear, disappointment with futility of advice); recognizing and accepting patient capacities (ascertaining patient's drive for lifestyle change, conceding to ingrained habits, prioritizing urgent comorbidities, tailoring to patient environment and literacy); avoiding over-medicalization (averting long-term dependence on medications, preventing a false sense of security, minimizing stress of sickness); and minimizing economic burdens (avoiding unjustified costs to patients, delivering practice within budget, alleviating healthcare expenses).

**Conclusions:** GPs sought to empower patients to prevent CVD but the complexities of considering the patient's individual factors such as practical circumstances, and the economic implications of prescribing medications, were challenging. Community-based strategies for assessing CVD risk involving other health professionals, and decision aids that address the individuality of the patient's health and environment, may support GPs in their decisions regarding CVD prevention.

## ARTICLE SUMMARY

### Strengths and limitations of this study:

- Qualitative studies conducted in range of settings and populations were synthesized to generate a more comprehensive understanding of decision-making and approaches to CVD prevention among general practitioners.
- Some studies did not specify whether an absolute risk assessment or individual risk factor approach was used, and differences between perspectives on primary and secondary prevention were unclear.

### Key messages:

- GP perspectives are reflected in six major themes: defining own primary role, trusting external expertise, motivating behaviour change for prevention, recognizing and accepting patient capacities, avoiding over-medicalization, and minimizing economic burdens.
- Variability in practice can be attributed to patient factors (e.g. socioeconomic status, lifestyle habits), region, and the GP's knowledge of nutrition and risk assessment tools.
- Implementing community-based strategies for assessing CVD risk, developing risk assessment tools that are applicable to a wider patient population and being conscious of appropriate drug prescription are important areas that should be addressed.

## INTRODUCTION

Cardiovascular disease (CVD) is the leading cause of global morbidity and mortality, contributing to over 30% of deaths worldwide(1-3). Cardiovascular events are highly preventable, through population and individual-level interventions such as smoking cessation, weight reduction, and blood pressure and lipid lowering therapies(4).

High quality primary care is critical to CVD prevention(5, 6), due to the opportunity to assess risks and to provide lifestyle and pharmacological interventions. It is widely recommended that primary prevention of CVD be based on the assessment and management of absolute risk (7, 8), but there is evidence of research-practice gaps, with inconsistencies in the use of risk assessment tools and guidelines(8-10), advice on lifestyle interventions and prescription of preventive medications(11, 12).

While these shortfalls are likely to be due to many factors (5, 13) including challenges in managing diverse patient populations and variability in patient motivation(14), more detailed data on why this occurs at the healthcare provider level are limited, hindering practical strategies for improvement.

General practitioners (GPs) play a key role in assessment and management of CVD risk and qualitative studies have elucidated their perspectives on primary and secondary prevention of CVD. A synthesis of qualitative studies can generate a more comprehensive understanding of the reasons for decisions and approaches to CVD prevention across different settings and populations in primary care. We aimed to describe the spectrum of GP perspectives to inform strategies that may address concerns, uncertainties and the challenges in CVD prevention, to support decisions and implementation of evidence-based strategies for prevention of CVD and improved healthcare outcomes.

## METHODS

The reporting of this study follows the Enhancing Transparency of Reporting the Synthesis of Qualitative research (ENTREQ) framework(15) and the PRISMA checklist(16) (supplementary file 1)

### *Selection criteria*

Qualitative studies on the perspectives of GPs regarding the primary and secondary prevention of CVD were eligible for inclusion. GPs were defined as physicians who assumed responsibility for providing “continuing and comprehensive medical care to individuals, families, and communities”(17) and included primary care physicians and family practitioners. Studies published in peer-reviewed journals and doctoral dissertations were included. We excluded quantitative surveys, epidemiological studies (e.g. randomized trials), non-primary research articles (e.g. reviews), clinical guidelines, economic studies, and non-English articles to minimize misinterpretation in translation.

### *Data sources and searches*

The search strategy is provided in Supplementary File 2. Searches were conducted in MEDLINE, Embase, PsycINFO, and CINAHL from database inception to 3 November 2016. We searched the ProQuest Dissertation and Thesis database, British Library Electronic Digital Thesis Online Service (EThOS) and the Europe E-theses Portal for doctoral dissertations. Primary care journals, Google Scholar and reference lists of included studies were also searched. Titles and abstracts were screened by IJ who excluded studies that did not meet the inclusion criteria. The full texts of the remaining articles were assessed for eligibility.

### *Assessment of study reporting*

To evaluate comprehensiveness and transparency of reporting in each study, we used the Consolidated Criteria for Reporting Qualitative Health Research (COREQ). The framework included reporting items specific to the research team, study methods, context of the study, analysis, and interpretations. Three

1 reviewers (IJ, AJ, and CSH) independently assessed each study, and any inconsistencies were resolved  
2  
3 by discussion.  
4  
5

### 6 7 8 *Synthesis*

9  
10 Using thematic synthesis(18), we entered all the participant quotations and text from the “results”  
11 section of each paper into the software HyperRESEARCH (version 3.0.3, ResearchWare, Inc.  
12 Randolph, MA) to code the data. Author IJ read each article line-by-line and coded text into inductively  
13 derived concepts that reflected GPs’ perspectives on the prevention of CVD. We translated concepts  
14 within and across studies by adding coded text to existing concepts or creating a new concept when  
15 necessary. Similar concepts were grouped into themes. The preliminary themes were discussed with the  
16 research team to ensure that they captured the full range and depth of data reported in the primary  
17 studies. We identified conceptual links and developed a thematic schema. We cross-tabulated the  
18 themes with CVD primary and secondary prevention strategies (e.g. medications) lifestyle or behaviour  
19 change, risk assessment tools and service delivery models).  
20  
21  
22  
23  
24  
25  
26  
27  
28  
29  
30  
31  
32  
33

## 34 **RESULTS**

### 35 36 37 38 *Literature search*

39  
40 Of the 6853 articles identified in the search, we included 32 studies, involving more than 1,189 GPs  
41 (one study did not report the number of participants, figure 1). The characteristics of the studies are  
42 provided in Table 1. Across the studies, interviews, focus groups and questionnaires with open ended  
43 questions were used to collect the data.  
44  
45  
46  
47  
48  
49  
50

### 51 *Comprehensiveness of reporting in included studies*

52  
53 The comprehensiveness of reporting varied, with studies addressing 6 to 19 of the 24 criteria for  
54 reporting of qualitative studies (table 2). The participant selection strategy and the participant  
55 characteristics were reported in all 32 (100%) studies. The duration and the venue of data collection  
56  
57  
58  
59  
60



1 was specified in 17 (53%) and 8 (25%) studies, respectively. Twenty four (75%) studies reported  
2  
3 researcher triangulation, and 16 (50%) studies reported on their use of software to facilitate data  
4  
5 analysis. Quotations were provided in 27 (84%) studies.  
6  
7  
8  
9

### 10 *Synthesis*

11 We identified six themes: defining own primary role; trusting external expertise; motivating behaviour  
12  
13 change for prevention; recognizing and accepting patient capacities; avoiding medicalization; and  
14  
15 minimizing economic burdens. Selected quotations for each theme are provided in Table 3. The  
16  
17 relationships among themes are shown in Figure 2. Figure 3 shows a matrix of the themes that related  
18  
19 to each CVD prevention strategy. Most studies did not specify if perspectives related to primary or  
20  
21 secondary prevention or a specific population (e.g. high risk), however where possible these have been  
22  
23 delineated in the synthesis.  
24  
25  
26  
27  
28

### 29 **Defining own primary role**

30  
31  
32  
33  
34 *Duty to prescribe medication:* Some GPs believed their core role, as a physician, was to “offer the  
35  
36 tablets”(19) and prescribe medicines, whereas counseling patients to make lifestyle changes was a  
37  
38 secondary focus. Preventive medication was perceived by some as being less imposing than lifestyle  
39  
40 changes, as it would not impede on patients’ “quality of life”(20).  
41  
42  
43

44  
45 *Refraining from risking patients’ lives:* Some GPs were highly cautious and wary of putting patients’  
46  
47 lives at risk such that they exercised absolute “vigilance” (21) and advised patients to take preventive  
48  
49 medications regardless of their risk of CVD. This was seen as more effective in preventing CVD-  
50  
51 related death compared with recommendations for lifestyle change – “[GPs] would always recommend  
52  
53 preventative medication to their patients,... ‘I don’t take the slightest risk with someone else’s  
54  
55 life’”(22).  
56  
57  
58  
59  
60

1 *Partnering with specialists:* As patients at high risk of CVD often had comorbidities, some GPs “co-  
2 managed”(21) their patients with specialists. “Working together”(21) with specialists meant  
3 reinforcing, to the patient, the specialist’s advice and GPs believed that this would strengthen cohesive  
4 care for the patient.  
5  
6  
7  
8  
9

10  
11  
12 *Delegating responsibility to patients:* Some GPs defined their role as an “influencer”(23) in their  
13 patients’ self-motivation and management. They could only provide information but believed it was  
14 ultimately the patients’ duty to make lifestyle changes or take their medication. Enforcing medications  
15 and behaviour change on patients was deemed unethical and not within their professional purview, and  
16 seen as “presumptuous to make such strong demands”(20).  
17  
18  
19  
20  
21  
22  
23

24  
25 *Providing holistic care:* Some GPs emphasised their duty to provide comprehensive care, being “carers  
26 for the total patient,” which included taking responsibility for lifestyle, nutrition education, and  
27 prescribing medicine. Some GPs considered that this also involved “creating a positive  
28 expectation”(20), enabling the patient to feel optimistic about the preventive strategy outcomes, which  
29 was important for patient motivation.  
30  
31  
32  
33  
34  
35  
36  
37

### 38 **Trusting external expertise**

39  
40  
41

42 *Depending on credible evidence and opinion:* Some GPs trusted research evidence and expert opinion  
43 to feel secure about their decisions. Guidelines, risk assessment tools, and “editorials in the [British  
44 Medical Journal] BMJ”(24) were seen to minimize room for human error and were more reliable than  
45 their own judgment - “I’m comfortable to be guided by the experts rather than try and invent too much  
46 on what might be dodgy assumptions on my part.”(25)  
47  
48  
49  
50  
51  
52  
53  
54

55 *Entrusting care to other health professionals:* Educating patients about diet and nutrition to prevent  
56 CVD was regarded by some as being “outside their interest and expertise”(23) and believed that  
57  
58  
59  
60

1 dieticians or other clinicians were better able to inform patients about lifestyle changes. For patients  
2  
3 with comorbidities, some GPs considered specialists (e.g. psychiatrists, cardiologists) to have more  
4  
5 authority in educating their patients, as they had better knowledge of the patient's condition and  
6  
7 medication.  
8  
9

10  
11  
12 *Integrating into patient context:* Some GPs considered the patient's family history and background  
13  
14 when determining prevention strategies. They advocated the use of "human judgment," which  
15  
16 incorporated "emotional, political and logistical"(19) considerations rather than accepting risk scores  
17  
18 unconditionally. Others were unwilling to use risk scores to estimate pre-treatment risk due to  
19  
20 ambiguity of current guidelines regarding unique patient circumstances.  
21  
22

### 23 24 25 **Motivating behaviour change for prevention**

26  
27  
28  
29 *Highlighting tangible improvements:* Some GPs used visual prompts to demonstrate to their patients  
30  
31 the direct improvements in health and decrease of risk scores, which could be achieved through  
32  
33 changes to lifestyle. They believed this approach encouraged patients to make active changes by giving  
34  
35 them "something positive to cling to"(26).  
36  
37

38  
39  
40 *Negotiating patient acceptance:* When developing a strategy for preventing CVD, some GPs perceived  
41  
42 that compromise was necessary in encouraging patients to cooperate. An explicit discussion and  
43  
44 consideration of the patient's goals and priorities was seen to encourage patients to "work with the  
45  
46 doctor, not against the doctor"(27) which built trust. Some GPs co-produced a strategy with the patient  
47  
48 that was feasible for the patient's own situation.  
49  
50

51  
52  
53 *Enabling autonomy and empowerment:* Some GPs noted that patients with a lower risk of CVD were  
54  
55 highly anxious about their risk factors and responded by giving patients reassurance and control over  
56  
57

1 their medication and lifestyle prevention strategies. GPs perceived that patients who had a sense of  
2 autonomy and empowerment over their bodies felt more secure and willing to manage their risk factors.  
3  
4

5  
6  
7  
8 *Harnessing the power of fear:* When managing patients at high risk of CVD, some GPs felt that scaring  
9 patients into action was necessary and warranted. They believed that an emphasis on the consequences  
10 of disregarding and being non-adherent to prevention strategies motivated patients to accept their  
11 advice, telling their patients “if you don’t want that kind of scenario you do what I tell you”(26).  
12  
13  
14  
15

16  
17  
18 *Disappointment with futility of advice:* When patients were seen to lack motivation and had “no  
19 intention of doing anything”, some GPs perceived that their efforts to encourage the patient’s uptake of  
20 prevention strategies were a “waste of time”. In failing to motivate patients, GPs questioned their  
21 ability to prevent CVD in their patients, being “[un]convinced that we do as much good as we like to  
22 think we do”(28).  
23  
24  
25  
26  
27  
28  
29  
30

### 31 **Recognizing and accepting patient capacities**

32  
33  
34  
35

36 *Ascertaining patients’ drive for lifestyle change:* Some GPs felt they had to be realistic about their  
37 patients’ desires to modify their daily lives, including changes to diet, physical activity and  
38 commencing a medication regimen. When patients seemed unwilling, GPs refrained from encouraging  
39 lifestyle changes or prescribing drugs, to save their own time and resources.  
40  
41  
42  
43  
44  
45

46 *Conceding to ingrained habits:* Some GPs accepted that patients who had established long-term  
47 patterns in life were unlikely to alter their habits (e.g. smoking, diet), and so did not encourage lifestyle  
48 changes. They concluded that “medications are the only hope”(29) for patients who they believed were  
49 unable to adopt preventive behaviours.  
50  
51  
52  
53  
54  
55  
56  
57  
58  
59  
60

1 *Prioritizing urgent comorbidities:* In patients with comorbidities (e.g. diabetes, mental illness), some  
2  
3 GPs chose to delay prescribing strategies for CVD prevention to minimize the stress in patients of  
4  
5 having to contend with multiple treatments. They focused on the patient's primary condition until they  
6  
7 felt that the patient was emotionally and mentally prepared to discuss CVD prevention. For patients on  
8  
9 medication for another disease, GPs were hesitant to prescribe more medication as they expected that  
10  
11 the complexities of poly-pharmacy reduced overall adherence.  
12  
13  
14  
15

16 *Tailoring to patient environment and literacy:* Some GPs recognised that health literacy varied across  
17  
18 the patient population and communicated the level of risk of CVD by using various approaches (e.g.  
19  
20 statistics, visual graphs, simpler words) according to the patient's educational attainment and  
21  
22 socioeconomic status. GPs took into account the patient's environment to ensure feasibility of enacting  
23  
24 prevention strategies e.g. – “[the patient's neighborhood was not] conducive to making lifestyle  
25  
26 behavioural changes” with “multiple fast food outlets”(30).  
27  
28  
29  
30

### 31 **Avoiding over-medicalization**

32  
33  
34  
35

36 *Averting long-term dependence on medications:* Some GPs were concerned that most patients would be  
37  
38 inclined to opt for medications as an immediate and easy solution, rather than make lifestyle changes.  
39  
40 This was attributed to the marketing and widespread advertising of medications in the general public.  
41  
42 They believed that giving young patients or patients who were not at high risk a lifetime prescription of  
43  
44 medicine for preventive purposes should be avoided by encouraging lifestyle changes instead, to  
45  
46 prevent a dependence on medications when it was not absolutely necessary.  
47  
48  
49  
50

51 *Preventing a false sense of security:* Some GPs were cautious and critical of “medicaliz[ing] an  
52  
53 unhealthy lifestyle”(20) as this encouraged patients to continue with their harmful habits (e.g. sedentary  
54  
55 lifestyle, poor diet, smoking) and “forget about their lipid-lowering diet”(31). They noted that patients  
56  
57 trusted the medicine to reduce their risk of CVD in spite of their lifestyle choices. With reference to  
58  
59  
60

1 medications and lifestyle modification, GPs believed that “you cannot do one thing without the  
2 other”(32) and refrained from over-prescribing medicine to prevent patients from believing that they  
3 were “immortal”(31).  
4  
5  
6  
7  
8  
9

10 *Minimizing stress of sickness:* Regardless of the patient’s level of risk for CVD, some GPs urged to  
11 avoid instilling unnecessary anxiety in patients, as “fear becomes a major problem”(28) and in turn  
12 elevates their risk further. They were hesitant to “turn individuals into patients”(19) in the context of  
13 primary prevention for patients with low risk, as tests and preventive medications heightened their  
14 anxiety about their health. For example, a GP expected that a patient with high cholesterol would be  
15 conscious of their condition, and alerting them to their risk of heart attack would “get themselves into  
16 more of a state”(26).  
17  
18  
19  
20  
21  
22  
23  
24  
25  
26

### 27 **Minimizing economic burdens**

28  
29  
30  
31 *Avoiding unjustified costs to patients:* Some GPs were mindful of the economic burden of long-term  
32 medication on patients and thus prescribed medications only for patients at high risk as determined by  
33 their cholesterol or blood pressure. Some were also conscious and expressed concerns about the  
34 commercial interests of pharmaceutical companies – “95% of treatment with statins is wasted” and  
35 “fuelled by the interests of the pharmaceutical industry”(22). However, others believed in the long term  
36 cost effectiveness of preventive medicine in minimizing the potential for incurring costs for treatment  
37 of CVD.  
38  
39  
40  
41  
42  
43  
44  
45  
46  
47  
48

49 *Delivering practice within budget:* Some GPs in studies conducted in the UK were careful not to  
50 exceed their budget for drug prescriptions, and they were conscious of the limitations of funding  
51 available for their practice, which contended with external pressures (from pharmaceutical companies,  
52 health advertising) to offer drug treatment. GPs were more inclined to prescribe medicine for secondary  
53  
54  
55  
56  
57  
58  
59  
60

1 prevention of CVD or for primary prevention in patients with a high risk of CVD to ensure an adequate  
2 budget for other patients in their practice.  
3  
4

5  
6  
7  
8 *Alleviating healthcare expenses:* Some GPs perceived preventive procedures (blood tests, routine  
9 checks) to be a healthcare burden when the whole population was screened regardless of risk levels or  
10 immediate illnesses. This placed them under increasing pressure due to a greater demand for general  
11 screening. They were mindful of the resources and nurse time as well as their own time spent screening  
12 for risks for primary prevention in low-risk patients, as this detracted from resources available for  
13 patients who were “actually ill”(28).  
14  
15  
16  
17  
18  
19  
20  
21  
22

## 23 **DISCUSSION**

24  
25  
26  
27 Primary care healthcare providers believed that patients needed to be empowered to continue with  
28 medications and be motivated to make lifestyle changes for the prevention of CVD, but were  
29 challenged by the complexities of considering the patient’s cognitive capacities, practical  
30 circumstances, and health status. Some articulated a professional and ethical duty, to prescribe  
31 medications for prevention of CVD and subsequently minimize the risk of future CVD events that  
32 could be preventable, and to avoid taking any responsibility for risking the patients’ lives. However,  
33 some had concerns about prescribing patients long-term medications, particularly in the context of  
34 primary prevention and among patients who were not deemed to be at high risk of CVD.  
35  
36  
37  
38  
39  
40  
41  
42  
43  
44

45  
46  
47 Providers considered preventive strategies in the context of tensions between respecting patient  
48 autonomy and being too intrusive and paternalistic in recommending behaviour change. In making  
49 decisions about prescribing medication therapy, they considered the economic impact on their local  
50 practice (particularly in the UK) and broader healthcare costs, and specifically in terms of prioritising  
51 resources for patients with more urgent illnesses than to those who were asymptomatic with risk  
52 factors.  
53  
54  
55  
56  
57  
58  
59

1  
2  
3  
4 Differences in perspectives among GPs were apparent, in part reflecting their region of practice,  
5 sociodemographics of their patient population, and the use of an absolute CVD or individual risk factor  
6 approach. In studies conducted in New Zealand, the UK and Guatemala, GPs deliberated on the  
7 financial burden of screening in the general population for primary prevention and costs of medications  
8 incurred to their patients as well as their own practice. Some GPs who practiced in low socioeconomic  
9 areas believed that advising lifestyle changes, particularly in terms of diet, were futile as they believed  
10 that patients had limited access to healthy food in their local area. In earlier studies, GPs expressed  
11 more hesitation about prescribing medications, when this was not yet common practice nor widely  
12 recommended for primary prevention (20, 25, 33). The majority of studies did not specify whether GPs  
13 used an absolute risk or individual risk factor approach to management, and did not detail the risk  
14 profile of their patients (i.e. level of risk of CVD) when discussing preventive strategies. The concept  
15 of absolute risk was explicitly discussed in 17 (53%) studies, and these studies were focused on GPs  
16 perspectives on tools for assessing absolute risk for CVD prevention.  
17  
18  
19  
20  
21  
22  
23  
24  
25  
26  
27  
28  
29  
30  
31  
32  
33

34 Our study provides insights on the variability in decisions and approaches to CVD prevention among  
35 GPs. Approximately half of GPs use cardiovascular risk calculators and clinical guidelines (34), and  
36 those who do not use them have cited reasons including difficulties in using and interpreting the tools,  
37 and lack of applicability to their patient population in terms of age, socioeconomic background and  
38 family history. Our findings indicate that GPs may prefer to make their own judgment of individual  
39 risk factors acquired through experience rather than using absolute risk assessment tools.  
40  
41  
42  
43  
44  
45  
46  
47  
48

49 While a vast majority of GPs would recommend drug prescription where appropriate, this does not  
50 necessarily translate into rates of actual prescription. For example, a study in the UK found that only  
51 42% of patients eligible for lipid lowering drugs were prescribed them (12, 35). Our findings suggests  
52 that GPs' decisions to prescribe medication can be influenced by their perception of how likely the  
53 patient is willing to commence the regimen and how likely they are to adhere to medications. Also,  
54  
55  
56  
57  
58  
59  
60



1 some GPs expressed reluctance to “medicalize” unhealthy lifestyles and foster a false sense of security  
2  
3 in patients through medication.  
4  
5  
6  
7

8 A recent study found that more than half of GPs rated their ability to motivate behaviour change for  
9  
10 CVD prevention as being ‘not good’, particularly for patients who were over 65, male or obese (36).  
11  
12 Our findings indicate that GPs believe that it may be difficult to motivate change in patients with  
13  
14 established lifestyle habits, particularly in older or obese patients, and need a more immediate solution  
15  
16 such as medication.  
17  
18  
19  
20

21 The themes identified in our synthesis reflect findings from studies of GPs’ perspectives on the  
22  
23 prevention of other chronic conditions such as diabetes. In a study on the prevention of type 2  
24  
25 diabetes(37), GPs questioned their role and obligation in preventive care, where some expressed  
26  
27 frustration at the societal pressure placed upon them to screen patients for health risks despite the lack  
28  
29 of funding and resources. They believed that education about healthy lifestyles should be delivered via  
30  
31 schools and community programs. Similarly, some GPs felt pressure from pharmaceutical companies to  
32  
33 prescribe medication despite a limited budget for prescriptions within their own practice(29, 40, 67).  
34  
35 Instead, they preferred assistance from and delegation to specialists, nursing staff and dieticians. In the  
36  
37 context of diabetes, GPs were also concerned that resources in general practice were increasingly  
38  
39 directed towards management of diabetes, leading to the specialization of staff (nurses, general  
40  
41 practitioners) and a phasing out of general practice nurses. GPs similarly wanted to retain a generalist  
42  
43 role in CVD prevention and provide comprehensive care involving all aspects of preventative health  
44  
45 rather than a single focus on prevention of CVD(20).  
46  
47  
48  
49  
50

51 Our synthesis captured a broad range of the perspectives of GPs across different settings, and included  
52  
53 attitudes pertaining to various CVD prevention strategies. However, there are some potential  
54  
55 limitations. We were unable to differentiate whether GPs were using an absolute risk assessment or an  
56  
57 individual risk factor approach, and whether perspectives were different in primary and secondary  
58  
59

1 prevention, as these were not specified in most studies. Non-English articles were excluded, which  
2 could limit the transferability of the findings.  
3  
4  
5

6  
7  
8 Based on our findings, we suggest adapting or developing risk assessment tools that incorporate patient  
9 factors, motivating behaviour change in patients, and ensuring adoption of cost-effective strategies in  
10 prescribing medications. In preventive care, treatment of individual risk factors may still be used over  
11 absolute risk assessment, with low uptake of risk assessment tools(7, 8, 38). Greater use of absolute  
12 risk assessment tools and guidelines that explicitly address patient factors such as socioeconomic  
13 status, family history and lifestyle choices may be more useful for GPs(39-41). Motivating adherence  
14 for both behavioural and pharmaceutical changes remains a challenge for GPs. Despite behaviour  
15 change being a highly cost effective prevention strategy(42, 43), patient motivation and adherence to  
16 lifestyle advice is a barrier to preventive care (44-47). A multifaceted approach in a primary care  
17 setting involving supervised exercise sessions, follow up calls and timed medication reminders in  
18 addition to current GP services can improve patients' adherence to prescribed medication and  
19 behavioural changes, whilst addressing barriers such as time and resource constraints for GPs. Recent  
20 lifestyle intervention trials in a primary care setting revealed reductions in individual risk factors (blood  
21 pressure, obesity, cholesterol), and improvements in total mortality as well as fatal and non-fatal  
22 cardiovascular events(48-53). Recent reviews of interventions revealed that most of those resulting in  
23 long-term patient adherence to behavioural changes included other health care professionals such as  
24 nurses, pharmacists and therapists, involving more convenient care (for individual patients),  
25 reinforcement of lifestyle advice, family and psychological therapy, telephone follow-up and  
26 technological supportive care (Fitbits, text messaging, apps)(54-57).  
27  
28  
29  
30  
31  
32  
33  
34  
35  
36  
37  
38  
39  
40  
41  
42  
43  
44  
45  
46  
47  
48  
49

50 Our study also identified some research gaps, including perspectives on total (absolute) or individual  
51 (relative) risk assessment, effects of long term dependence on medication and guidelines for  
52 prescription in primary care. When referring specifically to absolute CVD risk, some GPs discussed  
53 absolute risk assessment tools, but did not talk in depth about the concept of absolute risk and how they  
54  
55  
56  
57  
58  
59

1 considered this in their decision-making and practice. A distinction between assessing absolute risk and  
2 individual risk factors is important in allowing for a more consistent and evidence-based evaluation for  
3 treatment plans. Current studies also did not address primary prevention in depth specifically, and some  
4 GPs expressed hesitation when providing primary preventive care to patients as they questioned the  
5 necessity for medication in asymptomatic patients and based on theoretical risk. Greater awareness of  
6 and adherence to evidence-based guidelines on medications for asymptomatic patients and risk factors  
7 may improve consistency of evaluating and managing CVD risk in patients(5, 7).

8 GPs believed that empowering patients to prevent CVD through adherence to lifestyle and medications  
9 was needed, but found it challenging to motivate behaviour change. Some considered that clinical  
10 decision-making for CVD prevention involved the patients' life stage and circumstances, capacity for  
11 self-management and their environment; which were not addressed in risk assessment and decision  
12 making tools. Greater availability and adaptability of evidence-based strategies for assessing and  
13 managing CVD risk, including behaviour change in patients, may support decisions and  
14 implementation of CVD prevention activities among GPs.

### 15 **Acknowledgements**

16 We thank all participants for sharing their interesting thoughts and perspectives for this study.

### 17 **Contributions**

18 IJ participated in the design of the search strategy, conducted the search, screened the studies, carried  
19 out thematic analysis and drafted the manuscript. AT designed the search strategy, participated in the  
20 thematic analysis and was the primary reviewer for the manuscript. EB, BC, AJ, JA, RK, TU, KM, CH,  
21 and JC provided a critical review of the manuscript, and provided final approval of the version to be  
22 published.

### 23 **Ethics approval**

1 This study did not require an ethics approval  
2  
3  
4

5  
6 **Funding statement:**

7  
8 The work was supported by a National Health and Medical Research Council of Australia Partnership  
9  
10 Grant [1092674], including support from the National Heart Foundation of Australia. AT is supported  
11  
12 by a NHMRC Fellowship [1106716].  
13  
14  
15

16  
17 **Declaration of competing interests**

18 The authors do not have any competing interests or conflicts of interest to declare  
19  
20  
21  
22

23  
24 **Data sharing**

25 No additional data are available  
26  
27  
28  
29  
30  
31  
32  
33  
34  
35  
36  
37  
38  
39  
40  
41  
42  
43  
44  
45  
46  
47  
48  
49  
50  
51  
52  
53  
54  
55  
56  
57  
58  
59  
60

## References

1. O'Rourke K, VanderZanden A, Shepard D. Cardiovascular Disease Worldwide, 1990-2013. *J Am Med Assoc.* 2015;314(18 ).
2. WHO. Cardiovascular diseases (CVDs). 2016.
3. Deaton C, Froelicher E, Wu L, et al. The global burden of cardiovascular disease. *Eur J Cardiovasc Nurs.* 2011;10 (Suppl 2):S5-13.
4. Ezzati M, Obermeyer Z, Tzoulaki I, et al. Contributions of risk factors and medical care to cardiovascular mortality trends. *Nat Rev Cardiol.* 2015;12:508-30.
5. Volker N, Davey R, Cochrane T, et al. Improving the Prevention of Cardiovascular Disease in Primary Health Care: The Model for Prevention Study Protocol. *J Med Internet Res.* 2014;3(3):e33.
6. Harris M, Lloyd J. The role of Australian primary health care in the prevention of chronic disease *ADMA.* 2012 September 28.
7. Jansen J, Bonner C, McKinn S, et al. General practitioners' use of absolute risk versus individual risk factors in cardiovascular disease prevention: an experimental study. *BMJ open.* 2014;15(4).
8. Gupta R, Stocks N, Broadbent J. Cardiovascular risk assessment in Australian General Practice. *Aust Fam Physician.* 2009;38(5):364-8.
9. Dallongeville J, Banegas JR, Halcox J, et al. Physicians' attitudes towards cardiovascular guidelines and risk assessment tools: Relation with the management of risk factors in the primary prevention setting. *Eur Heart J.* 2011;32:973.
10. Bell A. How Does the Use of Atrial Fibrillation Patient Tools for Stroke & Bleeding Risk Assessment (CHADS2/CHADSVASC/HAS-BLED) in Canada Impact Prescribing Habits? *Can J Cardiol.* 2012;28(5).
11. Kones R. Rosuvastatin, inflammation, C-reactive protein, JUPiTeR, and primary prevention of cardiovascular disease – a perspective. *Drug Des Devel Ther.* 2010;4:383-413.
12. Wutzler A, Bannehr M, Pohlmann AC, et al. The use of direct oral anticoagulants for stroke prevention in atrial fibrillation: A study on physicians' perspective and preferences. *Int J Cardiol.* 2014;175(1):188-91.
13. Haigh K, Bingley J, Golledge J, et al. Barriers to screening and diagnosis of peripheral artery disease by general practitioners. *Vasc Med.* 2013;18(6):325-30.
14. Jansen J, McKinn S, Bonner C, et al. General Practitioners' Decision Making about Primary Prevention of Cardiovascular Disease in Older Adults: A Qualitative Study. *PLoS One.* 2017;12(1):e0170228.

- 1 15. Tong A, Flemming KD, McInnes E, et al. Enhancing Transparency in reporting the synthesis of  
2 qualitative research: ENTREQ. *BMC Med Res Methodol.* 2012;12(181).
- 3  
4 16. Moher D, Liberati A, Tetzlaff J, Altman DG, The PRISMA Group (2009). Preferred Reporting Items  
5 for Systematic Reviews and Meta-Analyses: The PRISMA Statement. *BMJ* 2009;339:b2535
- 6  
7 17. OECD. OECD Health Statistics 2016. Definitions, Sources and Methods. 2016
- 8  
9 18. Thomas J, Harden A. Methods for the thematic synthesis of qualitative research in systematic reviews.  
10  
11 *BMC Med Res Methodol.* 2008;8(45).
- 12  
13 19. Greenfield S, Bryan S, Gill P, et al. Factors influencing clinicians' decisions to prescribe medication to  
14  
15 prevent coronary heart disease. *J Clin Pharm Ther.* 2005;30(1):77-84.
- 16  
17 20. Silwer L, Wahlstrom R, Lundborg CS. Views on primary prevention of cardiovascular disease--an  
18  
19 interview study with Swedish GPs. *BMC Fam Pract.* 2010;11:44.
- 20  
21 21. Bartels CM, Roberts TJ, Hansen KE, et al. Rheumatologist and Primary Care Management of  
22  
23 Cardiovascular Disease Risk in Rheumatoid Arthritis: Patient and Provider Perspectives. *Arthritis Care Res.*  
24  
25 2016;68(4):415-23.
- 26  
27 22. Gale NK, Greenfield S, Gill P, et al. Patient and general practitioner attitudes to taking medication to  
28  
29 prevent cardiovascular disease after receiving detailed information on risks and benefits of treatment: a  
30  
31 qualitative study. *BMC Fam Pract.* 2011;12:59.
- 32  
33 23. Pomeroy SE, Worsley A. Nutrition care for adult cardiac patients: Australian general practitioners'  
34  
35 perceptions of their roles. *Fam Pract.* 2008;25 Suppl 1:i123-9.
- 36  
37 24. Fairhurst K, Huby G. From trial data to practical knowledge: qualitative study of how general  
38  
39 practitioners have accessed and used evidence about statin drugs in their management of hypercholesterolaemia.  
40  
41 *BMJ.* 1998;317(7166):1130-4.
- 42  
43 25. Bonner C, Jansen J, McKinn S, et al. General practitioners' use of different cardiovascular risk  
44  
45 assessment strategies: a qualitative study. *Med J Aust.* 2013;199(7):485-9.
- 46  
47 26. Bonner C, Jansen J, McKinn S, et al. Communicating cardiovascular disease risk: an interview study of  
48  
49 General Practitioners' use of absolute risk within tailored communication strategies. *BMC Fam Pract.*  
50  
51 2014;15:106.
- 52  
53  
54  
55  
56  
57  
58  
59  
60

- 1 27. Wan Q, Harris MF, Zwar N, et al. Prerequisites for implementing cardiovascular absolute risk  
2 assessment in general practice: a qualitative study of Australian general practitioners' and patients' views. *J Eval*  
3 *Clin Pract.* 2010;16(3):580-4.  
4  
5  
6  
7 28. Williams SJ, Calnan M. Perspectives on prevention: the views of General Practitioners. *Sociol Health*  
8 *Illn.* 1994;16(3):372-93.  
9  
10  
11 29. Speechly C, Bridges-Webb C, McKenzie S, et al. Patient and general practitioner attitudes to healthy  
12 lifestyle behaviours and medication following coronary heart disease: an exploratory study. *Aust J Prim Health.*  
13 2010;16(2):154-8.  
14  
15  
16  
17 30. Doolan-Noble F, Tracey J, Mann S. Why are there gaps in our management of those with high  
18 cardiovascular risk? *J Prim Health Care.* 2012;4(1):21-9.  
19  
20  
21 31. Kedward J, Dakin L. A qualitative study of barriers to the use of statins and the implementation of  
22 coronary heart disease prevention in primary care. *Br J Gen Pract.* 2003;53(494):684-9.  
23  
24  
25 32. Bonner C, Jansen J, McKinn S, et al. How do general practitioners and patients make decisions about  
26 cardiovascular disease risk? *Health Psychol.* 2015;34(3):253-61.  
27  
28  
29 33. Fharm E, Rolandsson O, Johansson EE. 'Aiming for the stars - GPs' dilemmas in the prevention of  
30 cardiovascular disease in type 2 diabetes patients: Focus group interviews. *Fam Pract.* 2009;26(2):109-14.  
31  
32  
33 34. Schmieder RE, Goebel M, Bramlage P. Barriers to cardiovascular risk prevention and management in  
34 Germany – an analysis of the EURIKA study. *Vasc Health Risk Manag.* 2012;8:177-86.  
35  
36  
37 35. Wu J, Zhu S, Yao G, et al. Patient Factors Influencing the Prescribing of Lipid Lowering Drugs for  
38 Primary Prevention of Cardiovascular Disease in UK General Practice: A National Retrospective Cohort  
39 Study. *PLoS One.* 2013;8(7):e67611.  
40  
41  
42  
43 36. Diehl K, Mayer M, Mayer F, et al. Physical activity counseling by primary care physicians: attitudes,  
44 knowledge, implementation, and perceived success. *J Phys Act Health.* 2015;12(2):216-23.  
45  
46  
47 37. Williams R, Rapport F, Elwyn G, et al. The prevention of type 2 diabetes: general practitioner and  
48 practice nurse opinions. *Br J Gen Pract.* 2004;54(504):531-5.  
49  
50  
51 38. Chauhan U. Cardiovascular disease prevention in primary care. *Br Med Bull* 2007;81-82(1):65-79.  
52  
53 39. Goff DC, Lloyd-Jones D, Bennett G, et al. ACC/AHA guideline on the assessment of cardiovascular  
54 risk: A report of the American College of Cardiology/American Heart Association Task Force on Practice  
55 Guidelines. *Circ.* 2013;129:S49-S73.  
56  
57  
58  
59

- 1  
2  
3  
4  
5  
6  
7  
8  
9  
10  
11  
12  
13  
14  
15  
16  
17  
18  
19  
20  
21  
22  
23  
24  
25  
26  
27  
28  
29  
30  
31  
32  
33  
34  
35  
36  
37  
38  
39  
40  
41  
42  
43  
44  
45  
46  
47  
48  
49  
50  
51  
52  
53  
54  
55  
56  
57  
58  
59  
60
40. Anderson T, Grégoire J, Hegele R, et al. 2012 Update of the Canadian Cardiovascular Society Guidelines for the Diagnosis and Treatment of Dyslipidemia for the Prevention of Cardiovascular Disease in the Adult. *Can J Cardiol.* 2013;29:151-67.
  41. Piepoli M, Hoes A, Agewall S, et al. 2016 European Guidelines on cardiovascular disease prevention in clinical practice. *Eur Heart J.* 2016;37:2315-81.
  42. WHO. Obesity: Preventing and Managing the Global Epidemic. 1998(894).
  43. Mills KT, Dolan J, Bazzano LA, et al. Comprehensive Approach for Hypertension Control in Low-Income Populations: Rationale and Study Design for the Hypertension Control Program in Argentina. *Am J Med Sci.* 2014;348(2):139-45.
  44. Barfoed BL, Paulsen MS, Christensen PM, et al. Associations between patients' adherence and GPs' attitudes towards risk, statin therapy and management of non-adherence--a survey and register-based study. *Fam Pract.* 2016;33(2).
  45. Koelewijn-van Loon MS, van Steenkiste B, Ronda G, et al. Improving patient adherence to lifestyle advice (IMPALA): a cluster-randomised controlled trial on the implementation of a nurse-led intervention for cardiovascular risk management in primary care. *BMC Health Serv Res.* 2008;8(9).
  46. Sebaste E, WHO. Adherence to long-term therapies. Evidence for action. WHO 2003.
  47. Hobbs FD, Erhardt L. Acceptance of guideline recommendations and perceived implementation of coronary heart disease prevention among primary care physicians in five European countries: the Reassessing European Attitudes about Cardiovascular Treatment (REACT) survey. *Fam Pract.* 2002;19(6):596-604.
  48. Ebrahim S, Taylor F, Ward K, et al. Multiple risk factor interventions for primary prevention of coronary heart disease. *Cochrane Database Syst Rev.* 2011;1(CD001561).
  49. Eriksson M, Franks P, Eliasson M. A 3-year randomized trial of lifestyle intervention for cardiovascular risk reduction in the primary care setting: the Swedish Bjorknas study. *PLoS One.* 2009 4(4):e5195.
  50. Foltz S, Lichtenstein A, Seguin R, et al. The StrongWomen-Healthy Hearts program: reducing cardiovascular disease risk factors in rural sedentary, overweight, and obese midlife and older women. *Am J Public Health.* 2009;99(7):1271-7.
  51. Wister A, Loewen N, Kennedy-Symonds H, et al. One-year follow-up of a therapeutic lifestyle intervention targeting cardiovascular disease risk. *CMAJ.* 2007;177(8):859-65.
  52. Alliance NVDP. Guidelines for the management of absolute cardiovascular risk 2012.



- 1 53. Murphy E, Vellinga A, Byrne M, et al. Primary care organisational interventions for secondary prevention  
2 of ischaemic heart disease: a systematic review and meta-analysis. *Br J Gen Pract.* 2015;65(636):e460-e8.  
3  
4  
5 54. Haynes R, Ackloo E, Sahota N, et al. Interventions for enhancing medication adherence. *Cochrane*  
6 *Database Syst Rev.* 2008;2(CD000011).  
7  
8  
9 55. Glynn L, Murphy A, Smith S, et al. Interventions used to improve control of blood pressure in patients  
10 with hypertension. *Cochrane Database Syst Rev.* 2010 3(CD005182).  
11  
12  
13 56. Ogedegbe G, Schoenthaler A. A systematic review of the effects of home blood pressure monitoring on  
14 medication adherence. *J Clin Hypertens (Greenwich).* 2006;8(3):174-80.  
15  
16  
17 57. Khan N, Marvel FA, Wang J, et al. Digital Health Technologies to Promote Lifestyle Change and  
18 Adherence. *Curr Treat Options Cardio Med.* 2017;19(60).  
19  
20  
21 58. Liu H, Massi L, Laba TL, et al. Patients' and providers' perspectives of a polypill strategy to improve  
22 cardiovascular prevention in Australian primary health care: a qualitative study set within a pragmatic  
23 randomized, controlled trial. *Circ Cardiovasc Qual Outcomes.* 2015;8(3):301-8.  
24  
25  
26  
27 59. Wan Q, Harris MF, Zwar N, et al. Sharing risk management: an implementation model for  
28 cardiovascular absolute risk assessment and management in Australian general practice. *Int J Clin Pract.*  
29 2008;62(6):905-11.  
30  
31  
32  
33 60. Lebeau JP, Cadwallader JS, Vaillant-Roussel H, et al. General practitioners' justifications for therapeutic  
34 inertia in cardiovascular prevention: An empirically grounded typology. *BMJ Open.* 2016;6(5).  
35  
36  
37 61. Montano C, Estrada K, Chavez A, et al. Perceptions, knowledge and beliefs about prevention of  
38 cardiovascular diseases in Villa Nueva, Guatemala. *Prev Control.* 2008;3:1-9.  
39  
40  
41 62. Nielen MM, Assendelft WJ, Drenthen AJ, et al. Primary prevention of cardio-metabolic diseases in  
42 general practice: a Dutch survey of attitudes and working methods of general practitioners. *Eur J Gen Pract.*  
43 2010;16(3):139-42.  
44  
45  
46  
47 63. Sapre N, Mann S, Elley CR. Doctors' perceptions of the prognostic benefit of statins in patients who  
48 have had myocardial infarction. *Int Med J.* 2009;39(5):277-82.  
49  
50  
51 64. Torley D, Zwar N, Comino EJ, et al. GPs' views of absolute cardiovascular risk and its role in primary  
52 prevention. *Aust Fam Physician.* 2005;34(6):503-4, 7.  
53  
54  
55 65. Weiner M, Wells S, Kerse N. Perspectives of general practitioners towards evaluation and treatment of  
56 cardiovascular diseases among older people. *J Prim Health Care.* 2009;1(3):198-206.  
57  
58  
59

- 1  
2  
3  
4  
5  
6  
7  
8  
9  
10  
11  
12  
13  
14  
15  
16  
17  
18  
19  
20  
21  
22  
23  
24  
25  
26  
27  
28  
29  
30  
31  
32  
33  
34  
35  
36  
37  
38  
39  
40  
41  
42  
43  
44  
45  
46  
47  
48  
49  
50  
51  
52  
53  
54  
55  
56  
57  
58  
59  
60
66. Wahlstrom R, Owe Dahlgren L, Tomson G, et al. Perspectives on prevention: the views of General Practitioners. *Adv Health Sci Educ.* 1997;2:221-36.
67. Fisseni G, Lewis DK, Abholz HH. Understanding the concept of medical risk reduction: a comparison between the UK and Germany. *Eur J Gen Pract.* 2008;14(3-4):109-16.
68. Lewis DK, Robinson J, Wilkinson E. Factors involved in deciding to start preventive treatment: qualitative study of clinicians' and lay people's attitudes. *BMJ.* 2003;327(7419):841.
69. Liew SM, Blacklock C, Hislop J, et al. Cardiovascular risk scores: qualitative study of how primary care practitioners understand and use them. *Br J Gen Pract.* 2013;63(611):e401-7.
70. Macintosh MJ, Lacey EA, Tod AM. Secondary prevention for coronary heart disease: a qualitative study. *Br J Nurs.* 2003;12(8):462-9.
71. Summerskill WS, Pope C. 'I saw the panic rise in her eyes, and evidence-based medicine went out of the door.' An exploratory qualitative study of the barriers to secondary prevention in the management of coronary heart disease. *Fam Pract.* 2002;19(6):605-10.
72. Virdee SK, Greenfield SM, Fletcher K, et al. Would primary healthcare professionals prescribe a polypill to manage cardiovascular risk? A qualitative interview study. *BMJ Open.* 2013;3(3).
73. Wright CA, Osborn DPJ, Nazareth I, et al. Prevention of coronary heart disease in people with severe mental illnesses: A qualitative study of patient and professionals' preferences for care. *BMC Psychiatry.* 2006;6(16).
74. Rosal MC, Ockene JK, Luckmann R, et al. Coronary Heart Disease Multiple Risk Factor Reduction Providers' Perspectives. *Am J Prev Med* 2004;27(2S):54-60.
75. Wright FL, Wiles RA, Moher M, Strategies ATCGAoI. Patients' and practice nurses' perceptions of secondary preventive care for established ischaemic heart disease: a qualitative study. *J Clin Nurs.* 2001;10(2):180-8.

1  
2  
3  
4  
5  
6  
7  
8  
9  
10  
11  
12  
13  
14  
15  
16  
17  
18  
19  
20  
21  
22  
23  
24  
25  
26  
27  
28  
29  
30  
31  
32  
33  
34  
35  
36  
37  
38  
39  
40  
41  
42  
43  
44  
45  
46  
47  
48  
49  
50  
51  
52  
53  
54  
55  
56  
57  
58  
59  
60

**Figure legends**

**Figure 1. Search results**

**Figure 2. Matrix of preventions strategies and themes**

**Figure 3. Thematic schema**

For peer review only

Table 1. Characteristics of included studies

| Study ID                      | GPs (n*) | Patient population             | Prevention |           | Risk     |          | Conceptual methodological framework | Data collection                                 | Analysis            | CVD prevention topic area and scope |
|-------------------------------|----------|--------------------------------|------------|-----------|----------|----------|-------------------------------------|-------------------------------------------------|---------------------|-------------------------------------|
|                               |          |                                | Primary    | Secondary | Absolute | Relative |                                     |                                                 |                     |                                     |
| <b>Australia</b>              |          |                                |            |           |          |          |                                     |                                                 |                     |                                     |
| Bonner 2013 <sup>(25)</sup>   | 25       | General                        | NS         |           | •        |          | Phenomenological                    | Semi-structured interview                       | Framework analysis  | Risk assessment                     |
| Bonner 2014 <sup>(26)</sup>   | 25       | General                        | NS         |           | •        |          | Qualitative                         | Semi-structured interview                       | Framework analysis  | Risk assessment                     |
| Bonner 2015 <sup>(32)</sup>   | 25       | General                        | NS         |           | •        |          | Qualitative                         | Semi-structured interview                       | Framework analysis  | Risk assessment                     |
| Liu 2015 <sup>(58)</sup>      | 25       | Indigenous                     | •          |           | •        |          | Qualitative                         | Semi-structured interviews                      | Thematic analysis   | Medication                          |
| Pomeroy 2008 <sup>(23)</sup>  | 30       | General                        | NS         |           | NS       |          | Multi methods                       | Semi-structured interviews and questionnaire    | Conceptual analysis | Lifestyle change                    |
| Speechly 2010 <sup>(29)</sup> | 8        | Primary coronary heart disease |            | •         | •        |          | Qualitative                         | Semi-structured interviews                      | Thematic analysis   | Lifestyle change/ Medication        |
| Wan 2008 <sup>(59)</sup>      | 22       | High risk CV factor            | •          |           | •        |          | Qualitative                         | Focus groups and semi structured interview      | Thematic analysis   | Risk assessment                     |
| Wan 2010 <sup>(27)</sup>      | 22       | High risk CV factor            | •          |           | •        |          | Qualitative                         | Focus groups                                    | Thematic analysis   | Risk assessment                     |
| <b>France</b>                 |          |                                |            |           |          |          |                                     |                                                 |                     |                                     |
| Lebeau 2016 <sup>(60)</sup>   | 125      | High risk hypertensive         | •          |           | NS       |          | Qualitative                         | Open ended questionnaire                        | Thematic analysis   | Medication                          |
| <b>Guatemala</b>              |          |                                |            |           |          |          |                                     |                                                 |                     |                                     |
| Montano 2008 <sup>(61)</sup>  |          | General                        | NS         |           | NS       |          | Qualitative                         | Focus group discussions and in-depth interviews | Thematic analysis   | Lifestyle change                    |
| <b>Netherlands</b>            |          |                                |            |           |          |          |                                     |                                                 |                     |                                     |

1  
2  
3  
4  
5  
6  
7  
8  
9  
10  
11  
12  
13  
14  
15  
16  
17  
18  
19  
20  
21  
22  
23  
24  
25  
26  
27  
28  
29  
30  
31  
32  
33  
34  
35  
36  
37  
38  
39  
40  
41  
42  
43  
44  
45  
46  
47

|                                   |     |                               |    |   |    |   |                  |                                                              |                              |                                |
|-----------------------------------|-----|-------------------------------|----|---|----|---|------------------|--------------------------------------------------------------|------------------------------|--------------------------------|
| Nielen 2010 <sup>(62)</sup>       | 330 | General                       | •  |   | NS |   | Qualitative      | Open ended questionnaire                                     | Thematic analysis            | Lifestyle change               |
| <b>New Zealand</b>                |     |                               |    |   |    |   |                  |                                                              |                              |                                |
| Doolan-Noble 2012 <sup>(30)</sup> | 29  | High CVD risk                 | •  |   | •  |   | Qualitative      | Focus group                                                  | Thematic analysis            | barriers and facilitators      |
| Sapre 2009 <sup>(63)</sup>        | 20  | Primary myocardial infarction |    | • | •  | • | Qualitative      | Semi-structured interview                                    | Conceptual analysis          | Medication                     |
| Torley 2005 <sup>(64)</sup>       | 36  | General                       | •  |   | •  |   | Qualitative      | Focus groups                                                 | Thematic analysis            | Risk assessment                |
| Weiner 2009 <sup>(65)</sup>       | 86  | Older people                  | NS |   | •  |   | Qualitative      | Questionnaire                                                | Thematic analysis            | Risk assessment and management |
| <b>Scotland</b>                   |     |                               |    |   |    |   |                  |                                                              |                              |                                |
| Fairhurst 1998 <sup>(24)</sup>    | 24  | General                       | •  | • | NS |   | Qualitative      | Semi-structured interview                                    | NS                           | Medication                     |
| <b>Sweden</b>                     |     |                               |    |   |    |   |                  |                                                              |                              |                                |
| Fharm 2009 <sup>(33)</sup>        | 14  | Type 2 diabetes               | NS |   | NS |   | Qualitative      | Focus group                                                  | qualitative content analysis | Lifestyle changes/medication   |
| Silwer 2010 <sup>(20)</sup>       | 21  | General                       | •  |   | •  |   | Qualitative      | Semi-structured interview                                    | Thematic analysis            | Medication                     |
| Wahlstrom 1997 <sup>(66)</sup>    | 20  | General                       | •  | • | NS |   | Phenomenological | Semi-structured Interview                                    | Conceptual analysis          | Medication                     |
| <b>United Kingdom</b>             |     |                               |    |   |    |   |                  |                                                              |                              |                                |
| Fisseni 2008 <sup>(67)</sup>      | 6   | General                       | NS |   | •  |   | Qualitative      | Semi-structured interview                                    | qualitative content analysis | Risk assessment                |
| Gale 2011 <sup>(22)</sup>         | 13  | General                       | •  |   | •  | • | Qualitative      | Semi-structured Interview                                    | Thematic analysis            | Medication                     |
| Greenfield 2005 <sup>(19)</sup>   | 192 | General                       | NS |   | NS |   | Qualitative      | Closed question postal questionnaire with free text comments | Thematic analysis            | Medication                     |
| Kedward                           | 26  | General                       | •  | • | NS |   | Qualitative      | Semi-structured                                              | Thematic                     | Medication                     |

1  
2  
3  
4  
5  
6  
7  
8  
9  
10  
11  
12  
13  
14  
15  
16  
17  
18  
19  
20  
21  
22  
23  
24  
25  
26  
27  
28  
29  
30  
31  
32  
33  
34  
35  
36  
37  
38  
39  
40  
41  
42  
43  
44  
45  
46  
47

|                                   |    |                                  |    |    |    |   |  |             |                                         |                     |                                |
|-----------------------------------|----|----------------------------------|----|----|----|---|--|-------------|-----------------------------------------|---------------------|--------------------------------|
| 2003 <sup>(31)</sup>              |    |                                  |    |    |    |   |  | interview   | analysis                                |                     |                                |
| Lewis 2003 <sup>(68)</sup>        | 4  | General                          | NS |    | •  |   |  | Qualitative | Semi-structured interview               | Thematic analysis   | Medication                     |
| Liew 2013 <sup>(69)</sup>         | 20 | General                          | •  |    | •  | • |  | Qualitative | Face-to-face semi-structured interviews | Thematic analysis   | Risk assessment                |
| Macintosh 2003 <sup>(70)</sup>    | 18 | Primary coronary heart disease   |    | •  | NS |   |  | Qualitative | Semi-structured interviews              | Conceptual analysis | Nurse-led clinics              |
| Summerskil I 2002 <sup>(71)</sup> | 14 | Secondary coronary heart disease |    | NS | NS |   |  | Qualitative | Semi-structured interviews              | Thematic analysis   | Barriers and facilitators      |
| Virdee 2013 <sup>(72)</sup>       | 11 | General                          | •  | •  | NS |   |  | Qualitative | Semi structured interview               | Thematic analysis   | Medication                     |
| Williams 1994 <sup>(28)</sup>     | 40 | General                          | •  | •  | NS |   |  | Qualitative | In depth interview                      | Thematic analysis   | Lifestyle change/ Medication   |
| Wright 2006 <sup>(73)</sup>       | 10 | Severe mental illness            | •  |    | NS |   |  | Qualitative | In-depth interviews                     | Thematic analysis   | Lifestyle change/ Medication   |
| <b>United States of America</b>   |    |                                  |    |    |    |   |  |             |                                         |                     |                                |
| Bartels 2016 <sup>(21)</sup>      | 9  | Rheumatoid arthritis             | NS |    | NS |   |  | Qualitative | Semi-structured interview               | Grounded theory     | Risk assessment and management |
| Rosal 2004 <sup>(74)</sup>        | 11 | High risk coronary heart disease | NS |    | •  |   |  | Qualitative | Focus groups                            | Thematic analysis   | Lifestyle change/ Medication   |

\*n= general practitioners (including primary care physicians); •, type of prevention and risk specified in the study; CVD, cardiovascular disease; CV, cardiovascular; NS, not stated; UK, United Kingdom; US, United State

**Table 2. Completeness of reporting in the included studies**

| Item                                                                                   | Studies reporting each item                    | Number of studies (%) |
|----------------------------------------------------------------------------------------|------------------------------------------------|-----------------------|
| <b>Personal Characteristics</b>                                                        |                                                |                       |
| Interviewer / facilitator identified                                                   | (19, 20, 23-26, 29, 31-33, 58, 60, 63, 71, 72) | 15 (45)               |
| Experience or training in qualitative research                                         | (26, 31, 32, 58, 74)                           | 5 (15)                |
| <b>Relationship with participants</b>                                                  |                                                |                       |
| Relationship established prior to study commencement                                   | (31, 58, 60, 67-69)                            | 6 (18)                |
| <b>Participant Selection</b>                                                           |                                                |                       |
| Selection strategy ( <i>e.g. snowball, purposive, convenience, comprehensive</i> )     | (19-33, 58-74)                                 | 32 (100)              |
| Method of approach or recruitment                                                      | (19-23, 25-27, 29-33, 58-69, 71-74)            | 29 (91)               |
| Sample size                                                                            | (19-33, 58-74)                                 | 32 (100)              |
| Number and/or reasons for non-participation                                            | (20, 21, 24-29, 31-33, 58, 62-66, 68, 71-73)   | 21 (66)               |
| <b>Setting</b>                                                                         |                                                |                       |
| Venue of data collection                                                               | (19, 58, 60, 61, 67-70)                        | 8 (24)                |
| Presence of non-participants ( <i>e.g. clinical staff</i> )                            | (30, 33, 67)                                   | 3 (10)                |
| Description of the sample                                                              | (19-33, 58-69, 72-74)                          | 30 (94)               |
| <b>Data Collection</b>                                                                 |                                                |                       |
| Questions, prompts or topic guide                                                      | (19-33, 58-69, 71-74)                          | 31 (97)               |
| Repeat interviews / observations                                                       | (22, 23, 30, 33, 66, 73)                       | 6 (18)                |
| Audio / visual recording                                                               | (20, 21, 23-33, 58-61, 63, 64, 66-72, 74, 75)  | 28 (88)               |
| Field notes                                                                            | (27, 33, 61, 63, 64, 72)                       | 6 (18)                |
| Duration of data collection (interview or focus group)                                 | (20, 21, 25, 27, 30, 33, 58, 59, 65-74)        | 18 (56)               |
| Protocol for data preparation and transcription                                        | (19-27, 29-33, 58-63, 65-70, 72-74)            | 29 (91)               |
| Data (or theoretical) saturation                                                       | (21, 22, 25, 26, 31-33, 58, 59, 69, 72, 73)    | 12 (36)               |
| <b>Data Analysis</b>                                                                   |                                                |                       |
| Researcher/expert triangulation (multiple researchers involved in coding and analysis) | (19-21, 23-33, 58-60, 64, 66-73)               | 25 (76)               |
| Derivation of themes or findings ( <i>e.g. inductive, constant comparison</i> )        | (19-33, 58-61, 64-74)                          | 30 (94)               |
| Use of software ( <i>e.g. NVivo, HyperRESEARCH, Atlas.ti</i> )                         | (20, 21, 23, 27-29, 58-61, 63, 66, 69-71, 73)  | 16 (48)               |
| Participant feedback on findings                                                       | (21, 23, 30, 31, 66, 72)                       | 6 (18)                |

| <b>Reporting</b>                                                                               |                                     |         |
|------------------------------------------------------------------------------------------------|-------------------------------------|---------|
| Participant quotations or raw data provided ( <i>picture, diary entries</i> )                  | (19-22, 24-33, 58-60, 63-68, 70-74) | 28 (88) |
| Range and depth of insight into participant perspectives ( <i>thick description provided</i> ) | (19-33, 58-61, 66-68, 71-74)        | 26 (82) |

For peer review only



Table 3. Selected quotations from primary studies to illustrate each theme

| Theme                                      | Quotations                                                                                                                                                                                                                                                                                                                                                                                                                                                                                                                                                                                                                                                                                      | Contributing Studies                 |
|--------------------------------------------|-------------------------------------------------------------------------------------------------------------------------------------------------------------------------------------------------------------------------------------------------------------------------------------------------------------------------------------------------------------------------------------------------------------------------------------------------------------------------------------------------------------------------------------------------------------------------------------------------------------------------------------------------------------------------------------------------|--------------------------------------|
| <b>Defining own primary role</b>           |                                                                                                                                                                                                                                                                                                                                                                                                                                                                                                                                                                                                                                                                                                 |                                      |
| Duty to prescribe medication               | <p>"...but it's not prevention if you think that it's just diet and physical exercise... if we don't provide medical treatment for them..."(33)</p> <p>"Some GPs regarded themselves as responsible for the care and treatment of the patient and would intervene when necessary. They would act as active coaches and prescribe adequate medical treatment when needed to prevent cardiovascular complications."(33)</p> <p>"Non-pharmaceutical treatment is not effective and it is important, in primary prevention, to avoid negative impacts on quality of life through changes in lifestyle, since we are mostly dealing with people who feel healthy before they get treatment."(20)</p> | (19, 20, 31, 33)                     |
| Refraining from risking patients' lives    | <p>"he would always recommend preventative medication to their patients, saying ' I don' t take the slightest risk with someone else' s life'"(22)</p> <p>"Professional vigilance: Provider's attention and alertness to seek and review information or knowledge about a patient's risk"(21)</p> <p>"it is worth treating anyone at risk of cardiovascular disease (with the patient's co-operation and full knowledge of the facts), however small the risk"(19)</p> <p>"the drug would 'reduce the chance of further coronary events'"(63)</p>                                                                                                                                               | (19, 21, 22, 63)                     |
| Mediating between patients and specialists | <p>"I am really trying to, as a primary care doctor, work on. . .the importance of preventing cardiovascular disease. . . and the increased risk with these inflammatory conditions. . .So I think that's a good co-manage thing, where the rheumatologist can stress that, and then I can keep going with it"(21)</p> <p>"Providers who felt comfortable contacting one another through familiarity or "shared" patients (conditions) were sometimes described as "co-managing," working together on CVD prevention"(21)</p>                                                                                                                                                                   | (21)                                 |
| Delegating responsibility to patients      | <p>"Our job is to advocate for nutrition change. Tell them about the risk if they continue eating the same way. Provide the literature and keep doing the tests. That is all we can do until the patient wants to take action. You could call us the influencers."(23)</p> <p>"I control the information, the prescribing decision is shared, but whether or not they then purchase and take the medicines, I don't control that..."(20)</p> <p>"I don't consider myself having the right to demand that people stop smoking. I think it is presumptuous to make such strong demands."(20)</p>                                                                                                  | (20, 23, 27, 28, 33)                 |
| Providing holistic care                    | <p>"Few interviewed doctors reported that the provision of nutrition education was part of their medical role. These doctors used words such as 'holistic' and statements such as 'we are carers for the total patient' to describe this role."(23)</p> <p>"Here, the doctor's persuasive attitude towards the patient, creating a positive expectation, was considered important."(20)</p> <p>"The doctor has the main responsibility, because he or she has the adequate skills and enjoys the patient's confidence to make the decisions, and because the patients sometimes make themselves dependent and are unwilling to decide."(20)</p>                                                 | (20, 23, 28, 65)                     |
| <b>Trusting external expertise</b>         |                                                                                                                                                                                                                                                                                                                                                                                                                                                                                                                                                                                                                                                                                                 |                                      |
| Depending on credible evidence and opinion | <p>"I'm comfortable to be guided by the experts rather than try and invent too much on what might be dodgy assumptions on my part."(25)</p> <p>"Firm trust in the scientific documentation of effectiveness for the individual and of cut-off points as true levels of increased predictable risk."(20)</p> <p>"Some doubts about the effectiveness for the individual, but acceptance of the guidelines as rules to obey (even if they change over time), hoping and wishing that one is doing the best for the patient."(20)</p> <p>"I think the strength of the absolute risk concept is that it improves the targeting of certain interventions, so that you have a greater</p>             | (20, 24, 25, 28, 33, 59, 60, 63, 71) |

|                                                  |                                                                                                                                                                                                                                                                                                                                                                                                                                                                                                                                                                                                                                                                                                          |                                                 |
|--------------------------------------------------|----------------------------------------------------------------------------------------------------------------------------------------------------------------------------------------------------------------------------------------------------------------------------------------------------------------------------------------------------------------------------------------------------------------------------------------------------------------------------------------------------------------------------------------------------------------------------------------------------------------------------------------------------------------------------------------------------------|-------------------------------------------------|
|                                                  | accuracy when you're prescribing things like Statins but also a greater accuracy and confidence when you prescribe just behavioral measures like diet and exercise..."(59)                                                                                                                                                                                                                                                                                                                                                                                                                                                                                                                               |                                                 |
| Entrusting care to other health professionals    | "...doctors reported that the provision of nutrition care was outside their interest and expertise. These GPs described themselves as 'generalists' and viewed 'nutrition education as a specialty service'."(23)<br>"[T]rained support staff to help us deal with these issues, who can sit down and speak with people about modification of lifestyle or risk factors. And who could then have follow-up for them also."(74)<br>"If I got a letter from [a cardiologist] saying that 'we really find drug Y is superior in this situation' then that would influence me to use it."(71)                                                                                                                | (23, 33, 60, 71, 73, 74)                        |
| Integrating into patient context                 | "[AR assessment] doesn't take into account your family history, your weight, if you're active or not . . . when you've been in this game for as many years as I have you like to get a big picture."(25)<br>"... you have to rely on your clinical gut feeling about that patient. Taking all the information that you have gathered to date, put it all together and compute it in your mind and then decide how hard you are going to chase each of these risk factors..."(64)<br>"The role [of] multivitamins is very important, as diet [is] often inadequate, and [it is] very difficult to get this age group to change. In saying that I sent a very motivated 83 year old to [a] dietitian."(65) | (19-21, 25, 32, 33, 63-65, 69, 71, 72)          |
| <b>Motivating behavior change for prevention</b> |                                                                                                                                                                                                                                                                                                                                                                                                                                                                                                                                                                                                                                                                                                          |                                                 |
| Highlighting tangible improvements               | "I'm trying to convince them that they're eating too much and not exercising enough and they're trying to convince me that they are...but the ones that take it on board and make progress...they feel positive... encouraged... rewarded...motivated to keep going."(26)<br>"You want somehow to give them something positive to cling to... that if I can do this and that and I can stop smoking or I can go down in weight or if I can be a little more physically active, I will have lots to gain"(20)<br>'... ive got one program where you can show the patient how the risk changes as you run the blood pressure down, or change the cholesterol. It's quite a powerful tool..."(64)           | (20, 26, 64)                                    |
| Negotiating patient acceptance                   | "This is a partnership not a dictatorship so it has to be something that's on your agenda as well as mine."(26)<br>"Three GPs had a 'negotiator' tendency, but the negotiations were mostly focused on lifestyle too: 'We insisted again on diet and exercise"(60)<br>"Clearly the evidence around the world is that the primary care practitioner/patient relationship is the magic ingredient in the health system. There's continuity and there's trust. You get better outcomes and part of that is that people are more willing to commit to treatment plans. I think the General Practitioner's role is key in promoting adherence"(58)                                                            | (19, 20, 26, 27, 29, 30, 58-60, 64, 65, 67, 74) |
| Enabling autonomy and empowerment                | "Reassuring people a bit and helping them to understand that they can control their risk factors either with or without medication and then I think that gives them a sense of empowerment, a bit of control."(26)<br>"You've just got to allow people to make an informed decision and leave it up to them"(68)                                                                                                                                                                                                                                                                                                                                                                                         | (26, 68)                                        |
| Harnessing the power of fear                     | "I am a hard master, I'm a very scary person...and I won't let you get away with things. But it's only because I care and because I want good things for you."(26)<br>"I like to...put a little fear into them...if they don't 'pull up your socks' (sic) bad things can happen to them...if you don't want that kind of scenario you do what I tell you."(26)<br>"...absolute risk charts and calculators were used by some GPs to 'scare' patients into taking action to reduce their risk of CVD, either through lifestyle change or medication."(26)                                                                                                                                                 | (26, 30, 33)                                    |
| Disappointment with futility of advice           | "But then there are probably an equal number of patients from whom we give this advice and they never want to hear it in the first place, and having heard it they have no intention of doing anything about it . . . I am not convinced that we do as much good as we like to think we do. I am fairly depressed that what we do is probably a complete waste of time . . . are we really preventing disease by what we                                                                                                                                                                                                                                                                                 | (28)                                            |

1  
2  
3  
4  
5  
6  
7  
8  
9  
10  
11  
12  
13  
14  
15  
16  
17  
18  
19  
20  
21  
22  
23  
24  
25  
26  
27  
28  
29  
30  
31  
32  
33  
34  
35  
36  
37  
38  
39  
40  
41  
42  
43  
44  
45  
46  
47

do?"(28)

**Recognizing and accepting patient capacities**

|                                                   |                                                                                                                                                                                                                                                                                                                                                                                                                                                                                                                                                                                                                                                                                                                                                                        |                                      |
|---------------------------------------------------|------------------------------------------------------------------------------------------------------------------------------------------------------------------------------------------------------------------------------------------------------------------------------------------------------------------------------------------------------------------------------------------------------------------------------------------------------------------------------------------------------------------------------------------------------------------------------------------------------------------------------------------------------------------------------------------------------------------------------------------------------------------------|--------------------------------------|
| Ascertaining patient's drive for lifestyle change | "They all want a pill (laughter) for everything and that's the main challenge we find . . . not many patients are willing to change their lifestyle unfortunately . . . they want the easy way out. A pill for everything."(32)<br>"I try to have a discussion with people to find out how much they want to use lifestyle modification and I think in situations it is very important to have the patient try the lifestyle to see if it will work and then treat them, to give them the option... I try to determine their preferences"(22)<br>"Trying to work out what barriers there are, so it means digging in a bit deeper into what makes this happen, what do you normally do, finding out more about their life and why they, what they can feasibly do"(29) | (19, 22, 23, 29, 32, 59, 60)         |
| Conceding to ingrained habits                     | "Because most patients you see in real life are elderly, and there you only find high levels, and you realize that you can give this advice about their lifestyle, but they will not be very effective on this person so you'd better prescribe pharmaceuticals"(20)<br>"I think that in some circumstances you can be outstandingly effective, because I have had some patients who have done very well as a result of it. But I think in general terms it is very difficult to change people's established patterns of behavior"(28)                                                                                                                                                                                                                                 | (20, 28, 29, 59)                     |
| Prioritizing urgent comorbidities                 | "Other patients had more important problems than CVD risk, either acute conditions that dominated one-off consultations or competing chronic issues such as mental health. In these situations, absolute risk was often not assessed until the patient was ready to discuss CVD risk"(26)<br>"Diabetic patients or hypertensive patients may already be on several medications already...and then if you are inflicting another tablet, then it's difficult and you are given the realms of polypharmacy. It can be very difficult and I am sure the compliance must drop considerably for such patients."(31)                                                                                                                                                         | (21, 23, 26, 30, 31, 58, 62, 71, 74) |
| Tailoring to patient environment and literacy     | " I think people with a higher education level are much more interested in perhaps in absolute figures and like to see the chart or the risk calculator and see how things can change. Whereas if you've got... someone who is less educated then you need to be a little bit more... simplistic in your description of risk and changing risk."(26)<br>"The environment many of our patients live in is not conducive to making lifestyle behavioral changes...multiple fast food outlets, pavements may not be safe, lack of cycle ways etc."(30)<br>"...prevention of CVD should be based on the reduction of RF through educational programmes that promote balanced diets, exercise and smoking cessation."(61)                                                   | (19, 26, 28, 30, 61)                 |
| <b>Avoiding over-medicalization</b>               |                                                                                                                                                                                                                                                                                                                                                                                                                                                                                                                                                                                                                                                                                                                                                                        |                                      |
| Averting long-term dependence on medications      | "Only that I think one of the most important things is this smoking cessation. I guess again because of the people I see, being young, that is what I hammer."(19)<br>"...but there is a pharmaceutical industry that puts pressure on us, it's in newspapers etc, we are continually fed with this... and I think it is as much my duty to sit here and tone down the risks for the young ones, above all. It doesn't seem reasonable that the majority of the population should take medicines"(20)<br>"Above all to give up smoking. That is the most important, as I see it..."(66)                                                                                                                                                                                | (19, 20, 31, 33, 66, 72, 74)         |
| Preventing a false sense of security              | "You cannot do one thing without the other . . . no use starting those tablets if you go overboard with the diet, I mean people say 'oh it doesn't matter, take the tablets I can do anything I like'. That's not true . . . you have to have a good diet as well as taking the tablets. The tablets alone is not going to fix everything."(32)<br>"It also can encourage people to believe that they are immortal almost and that the drug is going to protect them and that is not actually what it does, and it may actually encourage people to take less responsibility for their own illness which again is not good."(31)                                                                                                                                       | (20, 31, 32, 72, 74)                 |
| Minimizing stress of                              | "If the patient was highly anxious about their health, they may interpret even a low risk as something to be concerned about."(26)                                                                                                                                                                                                                                                                                                                                                                                                                                                                                                                                                                                                                                     | (20, 24, 25,                         |

|    |                                        |                                                                                                                                                                                                                                                                                                                                                                                                                                                     |                              |
|----|----------------------------------------|-----------------------------------------------------------------------------------------------------------------------------------------------------------------------------------------------------------------------------------------------------------------------------------------------------------------------------------------------------------------------------------------------------------------------------------------------------|------------------------------|
| 1  |                                        |                                                                                                                                                                                                                                                                                                                                                                                                                                                     |                              |
| 2  |                                        |                                                                                                                                                                                                                                                                                                                                                                                                                                                     |                              |
| 3  |                                        |                                                                                                                                                                                                                                                                                                                                                                                                                                                     |                              |
| 4  | sickness                               | “Then of course there are patient factors ... medicalization of society, the philosophical thing really in that you are perfectly well until you go to the doctor and come out with high cholesterol. It’s a bit like treating asymptomatic hypertension.”(31)                                                                                                                                                                                      | 28, 31, 33, 60, 66)          |
| 5  |                                        | “We are putting fear into people in order to achieve objectives which we are being paid for. And we have created, as a profession, a very frightened population ... So I am skeptical”(28)                                                                                                                                                                                                                                                          |                              |
| 6  |                                        |                                                                                                                                                                                                                                                                                                                                                                                                                                                     |                              |
| 7  | <b>Minimizing economic burdens</b>     |                                                                                                                                                                                                                                                                                                                                                                                                                                                     |                              |
| 8  |                                        |                                                                                                                                                                                                                                                                                                                                                                                                                                                     |                              |
| 9  | Avoiding unjustified costs to patients | “From every point of view, from patient care, cost . . . if you can make the changes which have the least amount of cost to everyone then I think that’s usually lifestyle. So that’s usually the way that I start with and then use medication if we’re not getting there.”(32)                                                                                                                                                                    | (20, 22, 31, 32, 58, 66, 68) |
| 10 |                                        | “The down side for the practice is that it is expensive and it’s a lot of patients who will be on it for life. Once you start someone on it, it is for life, so it is expensive in terms of cost of drugs...”(31)                                                                                                                                                                                                                                   |                              |
| 11 |                                        | “... it must be the medicines that did it, mustn’t it, it saved lots of money, I think, it’s costly intensive care, MI and stroke and those things”(20)                                                                                                                                                                                                                                                                                             |                              |
| 12 |                                        |                                                                                                                                                                                                                                                                                                                                                                                                                                                     |                              |
| 13 |                                        |                                                                                                                                                                                                                                                                                                                                                                                                                                                     |                              |
| 14 | Delivering practice within budget      | “I would only prescribe it if it doesn’t count on my medication budget!”(67)                                                                                                                                                                                                                                                                                                                                                                        | (19, 24, 30, 31, 61, 67)     |
| 15 |                                        | “I think there is massive external pressures on us for every single thing we prescribe and I think the statins thing is rather bizarre in that we were heavily penalized for overspending on our drug budgets when we were spending heavily on statins, and we still have that pressure on drug budgets with negative budgets and target payments and all the rest of it”(31)                                                                       |                              |
| 16 |                                        | “I think in terms of cost–benefit, it is an appropriate approach because people with an existing disease you are going to save lives and quality of life for less money spent in preventing. Primary prevention is going to be less cost-effective because the number of people you need to prescribe to prevent one event, so in that respect yes it is right, but whether it is right from an ethical point of view is difficult to answer.” (31) |                              |
| 17 |                                        |                                                                                                                                                                                                                                                                                                                                                                                                                                                     |                              |
| 18 |                                        |                                                                                                                                                                                                                                                                                                                                                                                                                                                     |                              |
| 19 |                                        |                                                                                                                                                                                                                                                                                                                                                                                                                                                     |                              |
| 20 |                                        |                                                                                                                                                                                                                                                                                                                                                                                                                                                     |                              |
| 21 |                                        |                                                                                                                                                                                                                                                                                                                                                                                                                                                     |                              |
| 22 | Alleviating healthcare expenses        | “at the moment we don’t have the resources to actually give the rehabilitation that we could do if we had the extra nurse time... we have the protocols, we have the expertise, but we don’t have the nurse hours to take that on”(70)                                                                                                                                                                                                              | (28, 31, 70, 73)             |
| 23 |                                        | “Some practitioners felt that primary care was under increasing pressure as a result of a general increase in demand and a shift of services from secondary to primary care. Pre-hospital thrombolysis was seen as a further increase in workload and possibly outside the current NHS contract.”                                                                                                                                                   |                              |
| 24 |                                        |                                                                                                                                                                                                                                                                                                                                                                                                                                                     |                              |
| 25 |                                        |                                                                                                                                                                                                                                                                                                                                                                                                                                                     |                              |
| 26 |                                        |                                                                                                                                                                                                                                                                                                                                                                                                                                                     |                              |
| 27 |                                        |                                                                                                                                                                                                                                                                                                                                                                                                                                                     |                              |
| 28 |                                        |                                                                                                                                                                                                                                                                                                                                                                                                                                                     |                              |
| 29 |                                        |                                                                                                                                                                                                                                                                                                                                                                                                                                                     |                              |
| 30 |                                        |                                                                                                                                                                                                                                                                                                                                                                                                                                                     |                              |
| 31 |                                        |                                                                                                                                                                                                                                                                                                                                                                                                                                                     |                              |
| 32 |                                        |                                                                                                                                                                                                                                                                                                                                                                                                                                                     |                              |
| 33 |                                        |                                                                                                                                                                                                                                                                                                                                                                                                                                                     |                              |
| 34 |                                        |                                                                                                                                                                                                                                                                                                                                                                                                                                                     |                              |
| 35 |                                        |                                                                                                                                                                                                                                                                                                                                                                                                                                                     |                              |
| 36 |                                        |                                                                                                                                                                                                                                                                                                                                                                                                                                                     |                              |
| 37 |                                        |                                                                                                                                                                                                                                                                                                                                                                                                                                                     |                              |
| 38 |                                        |                                                                                                                                                                                                                                                                                                                                                                                                                                                     |                              |
| 39 |                                        |                                                                                                                                                                                                                                                                                                                                                                                                                                                     |                              |
| 40 |                                        |                                                                                                                                                                                                                                                                                                                                                                                                                                                     |                              |
| 41 |                                        |                                                                                                                                                                                                                                                                                                                                                                                                                                                     |                              |
| 42 |                                        |                                                                                                                                                                                                                                                                                                                                                                                                                                                     |                              |
| 43 |                                        |                                                                                                                                                                                                                                                                                                                                                                                                                                                     |                              |
| 44 |                                        |                                                                                                                                                                                                                                                                                                                                                                                                                                                     |                              |
| 45 |                                        |                                                                                                                                                                                                                                                                                                                                                                                                                                                     |                              |
| 46 |                                        |                                                                                                                                                                                                                                                                                                                                                                                                                                                     |                              |
| 47 |                                        |                                                                                                                                                                                                                                                                                                                                                                                                                                                     |                              |

- 1           1   **List of supplementary files**
- 2
- 3           2
- 4
- 5           3   **Supplementary File 1. PRISMA checklist**
- 6
- 7           4   **Supplementary File 2. Search strategy**
- 8
- 9
- 10
- 11
- 12
- 13
- 14
- 15
- 16
- 17
- 18
- 19
- 20
- 21
- 22
- 23
- 24
- 25
- 26
- 27
- 28
- 29
- 30
- 31
- 32
- 33
- 34
- 35
- 36
- 37
- 38
- 39
- 40
- 41
- 42
- 43
- 44
- 45
- 46
- 47
- 48
- 49
- 50
- 51
- 52
- 53
- 54
- 55
- 56
- 57
- 58
- 59
- 60

For peer review only

Figure 1.

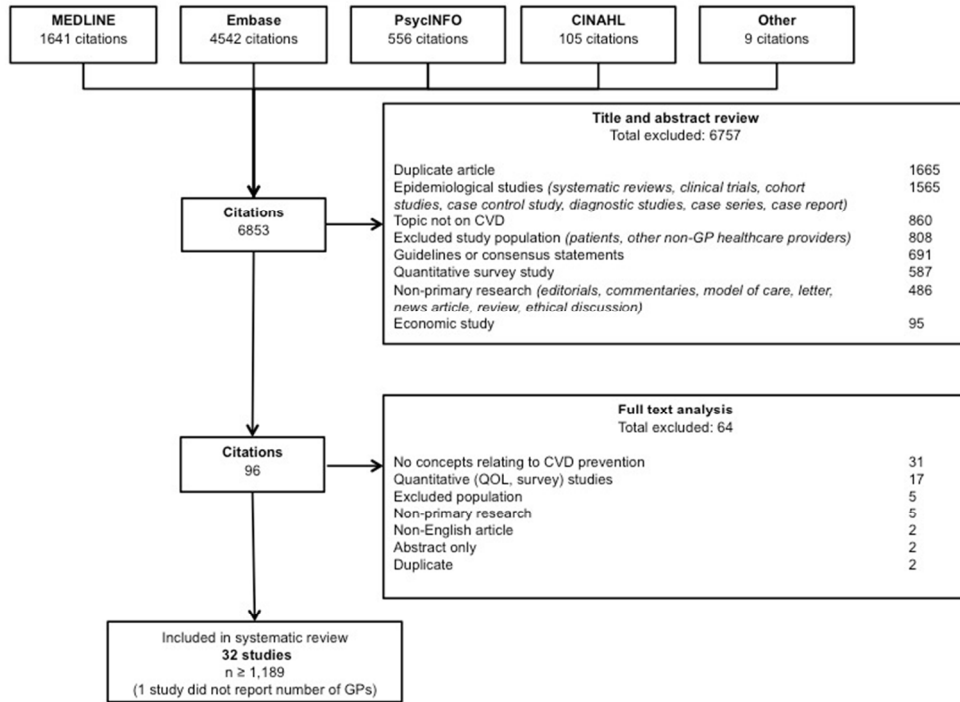

Figure 1

69x55mm (300 x 300 DPI)

Figure 2.

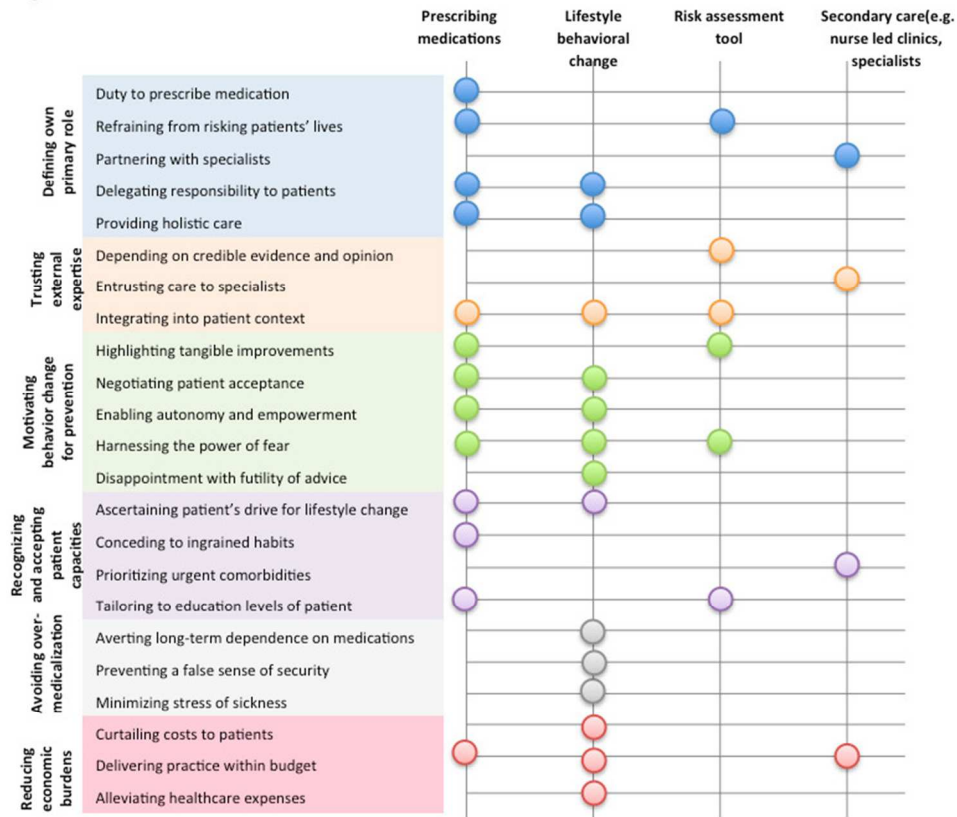

Figure 2

68x57mm (300 x 300 DPI)

Only

Figure 3.

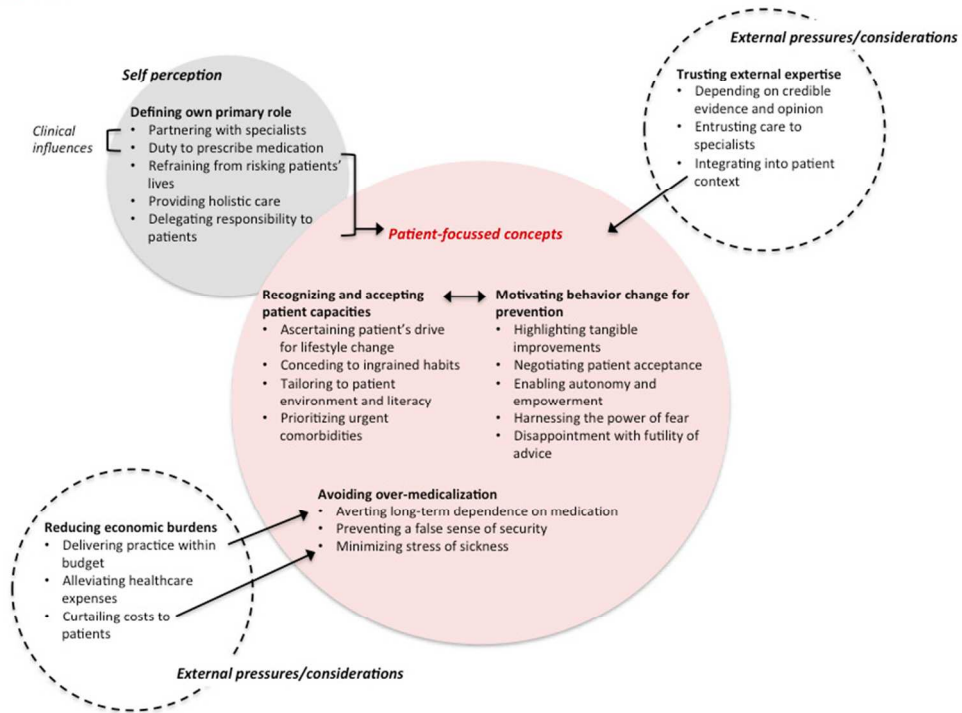

Figure 3

77x57mm (300 x 300 DPI)



Supplementary File 1. PRISMA checklist

1  
2  
3  
4  
5  
6  
7  
8  
9  
10  
11  
12  
13  
14  
15  
16  
17  
18  
19  
20  
21  
22  
23  
24  
25  
26  
27  
28  
29  
30  
31  
32  
33  
34  
35  
36  
37  
38  
39  
40  
41  
42  
43  
44  
45  
46  
47

| Section/topic                      | #  | Checklist item                                                                                                                                                                                                                                                                                              | Reported on page # |
|------------------------------------|----|-------------------------------------------------------------------------------------------------------------------------------------------------------------------------------------------------------------------------------------------------------------------------------------------------------------|--------------------|
| <b>TITLE</b>                       |    |                                                                                                                                                                                                                                                                                                             |                    |
| Title                              | 1  | Identify the report as a systematic review, meta-analysis, or both.                                                                                                                                                                                                                                         | 1                  |
| <b>ABSTRACT</b>                    |    |                                                                                                                                                                                                                                                                                                             |                    |
| Structured summary                 | 2  | Provide a structured summary including, as applicable: background; objectives; data sources; study eligibility criteria, participants, and interventions; study appraisal and synthesis methods; results; limitations; conclusions and implications of key findings; systematic review registration number. | 2-3                |
| <b>INTRODUCTION</b>                |    |                                                                                                                                                                                                                                                                                                             |                    |
| Rationale                          | 3  | Describe the rationale for the review in the context of what is already known.                                                                                                                                                                                                                              | 4                  |
| Objectives                         | 4  | Provide an explicit statement of questions being addressed with reference to participants, interventions, comparisons, outcomes, and study design (PICOS).                                                                                                                                                  | N/A                |
| <b>METHODS</b>                     |    |                                                                                                                                                                                                                                                                                                             |                    |
| Protocol and registration          | 5  | Indicate if a review protocol exists, if and where it can be accessed (e.g., Web address), and, if available, provide registration information including registration number.                                                                                                                               | N/A                |
| Eligibility criteria               | 6  | Specify study characteristics (e.g., PICOS, length of follow-up) and report characteristics (e.g., years considered, language, publication status) used as criteria for eligibility, giving rationale.                                                                                                      | 5                  |
| Information sources                | 7  | Describe all information sources (e.g., databases with dates of coverage, contact with study authors to identify additional studies) in the search and date last searched.                                                                                                                                  | 5                  |
| Search                             | 8  | Present full electronic search strategy for at least one database, including any limits used, such that it could be repeated.                                                                                                                                                                               | 38-40              |
| Study selection                    | 9  | State the process for selecting studies (i.e., screening, eligibility, included in systematic review, and, if applicable, included in the meta-analysis).                                                                                                                                                   | 5                  |
| Data collection process            | 10 | Describe method of data extraction from reports (e.g., piloted forms, independently, in duplicate) and any processes for obtaining and confirming data from investigators.                                                                                                                                  | 5                  |
| Data items                         | 11 | List and define all variables for which data were sought (e.g., PICOS, funding sources) and any assumptions and simplifications made.                                                                                                                                                                       | N/A                |
| Risk of bias in individual studies | 12 | Describe methods used for assessing risk of bias of individual studies (including specification of whether this was done at the study or outcome level), and how this information is to be used in any data synthesis.                                                                                      | N/A                |
| Summary measures                   | 13 | State the principal summary measures (e.g., risk ratio, difference in means).                                                                                                                                                                                                                               | N/A                |
| Synthesis of results               | 14 | Describe the methods of handling data and combining results of studies, if done, including measures of consistency (e.g., I <sup>2</sup> ) for each meta-analysis.                                                                                                                                          | 6                  |

1  
2  
3  
4  
5  
6  
7  
8  
9  
10  
11  
12  
13  
14  
15  
16  
17  
18  
19  
20  
21  
22  
23  
24  
25  
26  
27  
28  
29  
30  
31  
32  
33  
34  
35  
36  
37  
38  
39  
40  
41  
42  
43  
44  
45  
46  
47

| Section/topic                 | #  | Checklist item                                                                                                                                                                                           | Reported on page # |
|-------------------------------|----|----------------------------------------------------------------------------------------------------------------------------------------------------------------------------------------------------------|--------------------|
| Risk of bias across studies   | 15 | Specify any assessment of risk of bias that may affect the cumulative evidence (e.g., publication bias, selective reporting within studies).                                                             | N/A                |
| Additional analyses           | 16 | Describe methods of additional analyses (e.g., sensitivity or subgroup analyses, meta-regression), if done, indicating which were pre-specified.                                                         | N/A                |
| <b>RESULTS</b>                |    |                                                                                                                                                                                                          |                    |
| Study selection               | 17 | Give numbers of studies screened, assessed for eligibility, and included in the review, with reasons for exclusions at each stage, ideally with a flow diagram.                                          | 6                  |
| Study characteristics         | 18 | For each study, present characteristics for which data were extracted (e.g., study size, PICOS, follow-up period) and provide the citations.                                                             | 25-27              |
| Risk of bias within studies   | 19 | Present data on risk of bias of each study and, if available, any outcome level assessment (see item 12).                                                                                                | N/A                |
| Results of individual studies | 20 | For all outcomes considered (benefits or harms), present, for each study: (a) simple summary data for each intervention group (b) effect estimates and confidence intervals, ideally with a forest plot. | N/A                |
| Synthesis of results          | 21 | Present results of each meta-analysis done, including confidence intervals and measures of consistency.                                                                                                  | N/A                |
| Risk of bias across studies   | 22 | Present results of any assessment of risk of bias across studies (see Item 15).                                                                                                                          | N/A                |
| Additional analysis           | 23 | Give results of additional analyses, if done (e.g., sensitivity or subgroup analyses, meta-regression [see Item 16]).                                                                                    | 36                 |
| <b>DISCUSSION</b>             |    |                                                                                                                                                                                                          |                    |
| Summary of evidence           | 24 | Summarize the main findings including the strength of evidence for each main outcome; consider their relevance to key groups (e.g., healthcare providers, users, and policy makers).                     | 14-16              |
| Limitations                   | 25 | Discuss limitations at study and outcome level (e.g., risk of bias), and at review-level (e.g., incomplete retrieval of identified research, reporting bias).                                            | 17                 |
| Conclusions                   | 26 | Provide a general interpretation of the results in the context of other evidence, and implications for future research.                                                                                  | 18-19              |
| <b>FUNDING</b>                |    |                                                                                                                                                                                                          |                    |
| Funding                       | 27 | Describe sources of funding for the systematic review and other support (e.g., supply of data); role of funders for the systematic review.                                                               | 19                 |

From: Moher D, Liberati A, Tetzlaff J, Altman DG, The PRISMA Group (2009). Preferred Reporting Items for Systematic Reviews and Meta-Analyses: The PRISMA Statement. PLoS Med 6(7): e1000097. doi:10.1371/journal.pmed1000097

For more information, visit: [www.prisma-statement.org](http://www.prisma-statement.org).

1  
2  
3 **Supplementary File 2. Search strategies**  
4

5 **MEDLINE 1946 Oct Week 4 2016**  
6

|    | Searches                                                                                     | Results |
|----|----------------------------------------------------------------------------------------------|---------|
| 7  |                                                                                              |         |
| 8  | 1 exp General Practitioners/                                                                 | 5077    |
| 9  | 2 general practi\$.tw.                                                                       | 64556   |
| 10 | 3 or/1-2                                                                                     | 65664   |
| 11 | 4 exp Cardiovascular Diseases/                                                               | 2117749 |
| 12 | 5 cardiovascular\$.tw.                                                                       | 308453  |
| 13 | 6 Coronary Disease/                                                                          | 129106  |
| 14 | 7 Coronary Disease\$.tw.                                                                     | 12671   |
| 15 | 8 heart\$.tw.                                                                                | 664919  |
| 16 | 9 cardiac\$.tw.                                                                              | 466239  |
| 17 | 10 or/4-9                                                                                    | 2616567 |
| 18 | 11 prevent\$.tw.                                                                             | 1024939 |
| 19 | 12 exp Secondary Prevention/ or exp Primary Prevention/                                      | 149444  |
| 20 | 13 risk\$.tw.                                                                                | 1485970 |
| 21 | 14 rehabil\$.tw.                                                                             | 114459  |
| 22 | 15 or/11-14                                                                                  | 2503861 |
| 23 | 16 3 and 10 and 15                                                                           | 4016    |
| 24 | 17 exp qualitative research/                                                                 | 30070   |
| 25 | 18 qualitative.tw.                                                                           | 133329  |
| 26 | 19 interview\$.tw.                                                                           | 244266  |
| 27 | 20 focus group\$.tw.                                                                         | 25792   |
| 28 | 21 (thematic\$ or theme\$).tw.                                                               | 56062   |
| 29 | 22 grounded theory.tw.                                                                       | 6898    |
| 30 | 23 phenomenol\$.tw.                                                                          | 15355   |
| 31 | 24 ethnograph\$.tw.                                                                          | 6689    |
| 32 | 25 describ\$.tw.                                                                             | 1375284 |
| 33 | 26 (perspect\$ or percept\$ or attitud\$ or belie\$ or value\$ or view\$ or<br>prefer\$).tw. | 2467411 |
| 34 | 27 exp decision making/                                                                      | 164052  |
| 35 | 28 exp Patient Care/                                                                         | 657662  |
| 36 | 29 barrier\$.tw.                                                                             | 173488  |
| 37 | 30 exp "Attitude of Health Personnel"/                                                       | 135524  |
| 38 | 31 or/17-30                                                                                  | 4671363 |
| 39 | 32 16 and 31                                                                                 | 1641    |
| 40 |                                                                                              |         |
| 41 |                                                                                              |         |
| 42 |                                                                                              |         |
| 43 |                                                                                              |         |
| 44 |                                                                                              |         |
| 45 |                                                                                              |         |
| 46 |                                                                                              |         |
| 47 |                                                                                              |         |
| 48 |                                                                                              |         |
| 49 |                                                                                              |         |
| 50 |                                                                                              |         |
| 51 |                                                                                              |         |
| 52 |                                                                                              |         |
| 53 |                                                                                              |         |
| 54 |                                                                                              |         |
| 55 |                                                                                              |         |
| 56 |                                                                                              |         |
| 57 |                                                                                              |         |
| 58 |                                                                                              |         |
| 59 |                                                                                              |         |
| 60 |                                                                                              |         |

EMBASE 1980 3<sup>rd</sup> Nov 2016

|    | Searches                                                                                         | Results |
|----|--------------------------------------------------------------------------------------------------|---------|
| 1  | exp general practitioner/                                                                        | 87466   |
| 2  | general practi\$.tw.                                                                             | 84058   |
| 3  | or/1-2                                                                                           | 133537  |
| 4  | exp Cardiovascular Diseases/                                                                     | 3526033 |
| 5  | cardiovascular\$.tw.                                                                             | 480324  |
| 6  | exp coronary artery disease/                                                                     | 281174  |
| 7  | coronary disease\$.tw.                                                                           | 17579   |
| 8  | heart\$.tw.                                                                                      | 946313  |
| 9  | cardiac\$.tw.                                                                                    | 680447  |
| 10 | or/4-9                                                                                           | 4048303 |
| 11 | prevent\$.tw.                                                                                    | 1413901 |
| 12 | exp primary prevention/ or exp prevention study/ or exp secondary prevention/ or exp prevention/ | 1356956 |
| 13 | risk\$.tw.                                                                                       | 2292080 |
| 14 | rehabil\$.tw.                                                                                    | 175783  |
| 15 | or/11-14                                                                                         | 4322062 |
| 16 | 3 and 10 and 15                                                                                  | 9849    |
| 17 | exp qualitative research/                                                                        | 49159   |
| 18 | qualitative.tw.                                                                                  | 187253  |
| 19 | interview\$.tw.                                                                                  | 330538  |
| 20 | focus group\$.tw.                                                                                | 36113   |
| 21 | (thematic\$ or theme\$).tw.                                                                      | 83007   |
| 22 | grounded theory.tw.                                                                              | 9471    |
| 23 | phenomenol\$.tw.                                                                                 | 21106   |
| 24 | ethnograph\$.tw.                                                                                 | 8216    |
| 25 | describ\$.tw.                                                                                    | 1884958 |
| 26 | (perspect\$ or percept\$ or attitud\$ or belie\$ or value\$ or view\$ or prefer\$).tw.           | 3438822 |
| 27 | exp decision making/                                                                             | 285729  |
| 28 | exp patient care/                                                                                | 674562  |
| 29 | barrier\$.tw.                                                                                    | 247544  |
| 30 | exp health personnel attitude/                                                                   | 152448  |
| 31 | or/17-30                                                                                         | 6247395 |
| 32 | 16 and 31                                                                                        | 4542    |

**PsycINFO 1806 to Oct Week 4 2016**

| #  | Searches                                            | Results |
|----|-----------------------------------------------------|---------|
| 1  | exp General Practitioners/                          | 5369    |
| 2  | general practi\$.tw.                                | 11926   |
| 3  | or/1-2                                              | 13234   |
| 4  | exp Cardiovascular Disorders/                       | 52622   |
| 5  | cardiovascular\$.tw.                                | 24374   |
| 6  | exp Heart Disorders/ or exp Myocardial Infarctions/ | 12394   |
| 7  | coronary disease\$.tw.                              | 401     |
| 8  | heart\$.tw.                                         | 51423   |
| 9  | cardiac\$.tw.                                       | 15507   |
| 10 | or/5-9                                              | 79363   |
| 11 | 3 and 10                                            | 556     |

**CINAHL**

|    |                                                                                    |
|----|------------------------------------------------------------------------------------|
| S5 | S2 OR S3 OR S4                                                                     |
| S4 | (MH "Heart Diseases+")                                                             |
| S3 | (MM "Coronary Disease+") OR "Coronary Disease" OR (MM "Coronary Arteriosclerosis") |
| S2 | (MM "Cardiovascular Diseases+")                                                    |
| S1 | (MM "Physicians, Family")                                                          |

# BMJ Open

## General practitioners' perspectives on the prevention of cardiovascular disease: systematic review and thematic synthesis of qualitative studies

|                                 |                                                                                                                                                                                                                                                                                                                                                                                                                                                                                                                                                                                                                                                                                                                                                                                                                                                                                                                                                                                                                                                                                                                                                                                                                                                                                                                       |
|---------------------------------|-----------------------------------------------------------------------------------------------------------------------------------------------------------------------------------------------------------------------------------------------------------------------------------------------------------------------------------------------------------------------------------------------------------------------------------------------------------------------------------------------------------------------------------------------------------------------------------------------------------------------------------------------------------------------------------------------------------------------------------------------------------------------------------------------------------------------------------------------------------------------------------------------------------------------------------------------------------------------------------------------------------------------------------------------------------------------------------------------------------------------------------------------------------------------------------------------------------------------------------------------------------------------------------------------------------------------|
| Journal:                        | <i>BMJ Open</i>                                                                                                                                                                                                                                                                                                                                                                                                                                                                                                                                                                                                                                                                                                                                                                                                                                                                                                                                                                                                                                                                                                                                                                                                                                                                                                       |
| Manuscript ID                   | bmjopen-2017-021137.R1                                                                                                                                                                                                                                                                                                                                                                                                                                                                                                                                                                                                                                                                                                                                                                                                                                                                                                                                                                                                                                                                                                                                                                                                                                                                                                |
| Article Type:                   | Research                                                                                                                                                                                                                                                                                                                                                                                                                                                                                                                                                                                                                                                                                                                                                                                                                                                                                                                                                                                                                                                                                                                                                                                                                                                                                                              |
| Date Submitted by the Author:   | 29-May-2018                                                                                                                                                                                                                                                                                                                                                                                                                                                                                                                                                                                                                                                                                                                                                                                                                                                                                                                                                                                                                                                                                                                                                                                                                                                                                                           |
| Complete List of Authors:       | Ju, Irene; University of Sydney School of Public Health; Children's Hospital at Westmead Centre for Kidney Research<br>Banks, Emily; National Centre for Epidemiology and Population Health; Sax Institute<br>Calabria, Bianca; Australian National University Medical School, National Centre for Epidemiology and Population Health; University of New South Wales, National Drug and Alcohol Research Centre<br>Ju, Angela; University of Sydney School of Public Health; Children's Hospital at Westmead Centre for Kidney Research<br>Agostino, Jason; Australian National University, Academic Unit of General Practice<br>Korda, Rosemary; National Centre for Epidemiology and Population Health<br>Usherwood, Tim; University of Sydney, Department of General Practice<br>Manera, Karine; University of Sydney School of Public Health; Children's Hospital at Westmead Centre for Kidney Research<br>Hanson, Camilla; University of Sydney School of Public Health; Children's Hospital at Westmead Centre for Kidney Research<br>Craig, Jonathan; University of Sydney, Sydney School of Public Health; Children's Hospital at Westmead Centre for Kidney Research<br>Tong, Allison; The University of Sydney, Sydney School of Public Health; Children's Hospital at Westmead Centre for Kidney Research |
| <b>Primary Subject Heading</b>: | General practice / Family practice                                                                                                                                                                                                                                                                                                                                                                                                                                                                                                                                                                                                                                                                                                                                                                                                                                                                                                                                                                                                                                                                                                                                                                                                                                                                                    |
| Secondary Subject Heading:      | Cardiovascular medicine, Qualitative research                                                                                                                                                                                                                                                                                                                                                                                                                                                                                                                                                                                                                                                                                                                                                                                                                                                                                                                                                                                                                                                                                                                                                                                                                                                                         |
| Keywords:                       | GENERAL MEDICINE (see Internal Medicine), HEALTH SERVICES ADMINISTRATION & MANAGEMENT, Cardiology < INTERNAL MEDICINE                                                                                                                                                                                                                                                                                                                                                                                                                                                                                                                                                                                                                                                                                                                                                                                                                                                                                                                                                                                                                                                                                                                                                                                                 |
|                                 |                                                                                                                                                                                                                                                                                                                                                                                                                                                                                                                                                                                                                                                                                                                                                                                                                                                                                                                                                                                                                                                                                                                                                                                                                                                                                                                       |

SCHOLARONE™  
Manuscripts

1  
2  
3  
4  
5  
6  
7  
8  
9  
10  
11  
12  
13  
14  
15  
16  
17  
18  
19  
20  
21  
22

## **General practitioners' perspectives on the prevention of cardiovascular disease: systematic review and thematic synthesis of qualitative studies**

### **Authors' names and highest degrees**

Irene Ju<sup>1,2</sup>, Emily Banks, PhD<sup>3,4</sup>, Bianca Calabria, PhD<sup>3,5</sup>, Angela Ju, BPsych (Hons)<sup>1,2</sup>, Jason Agostino, FRACGP, BMed, MPhilAppEpi<sup>6</sup>, Rosemary J. Korda, PhD<sup>3</sup>, Tim Usherwood, MBBS, MD<sup>7</sup>, Karine Manera, MIPH<sup>1,2</sup>, Camilla S Hanson, BPsych (Hons)<sup>1,2</sup>, Jonathan C Craig, PhD<sup>1,2</sup>, Allison Tong, PhD<sup>1,2</sup>.

### **Affiliations of each author:**

<sup>1</sup>Sydney School of Public Health, The University of Sydney, Sydney, NSW 2006

<sup>2</sup>Centre for Kidney Research, The Children's Hospital at Westmead, Westmead, NSW 2145

<sup>3</sup>National Centre for Epidemiology and Population Health, Research School of Population Health, Australian National University, Canberra, Australia, ACT 0200

<sup>4</sup>Sax Institute, Ultimo, NSW 2007

<sup>5</sup>National Drug and Alcohol Research Centre, UNSW Australia, Sydney, NSW 2052

<sup>6</sup>Academic Unit of General Practice, School of Medicine, Australian National University

<sup>7</sup>Department of General Practice, Sydney Medical School Westmead, University of Sydney, Sydney, NSW 2006

### **Corresponding author:**

Irene Ju

Sydney School of Public Health, The University of Sydney, Sydney NSW 2006, Australia

Phone: +61 426 260 894      Email: [euju2374@uni.sydney.edu.au](mailto:euju2374@uni.sydney.edu.au)

**Word count (body): 3,900**

## ABSTRACT

**Objective:** CVD is a leading cause of morbidity and mortality globally, and prevention of CVD is a public health priority. This paper aims to describe the perspectives of general practitioners (GPs) on the prevention of cardiovascular disease (CVD) across different contexts.

**Setting:** 34 studies involving 1,223 participants across nine countries

**Results:** We identified six themes: defining own primary role (duty to prescribe medication, refraining from risking patients' lives, mediating between patients and specialists, delegating responsibility to patients, providing holistic care); trusting external expertise (depending on credible evidence and opinion, entrusting care to other health professionals, integrating into patient context); motivating behaviour change for prevention (highlighting tangible improvements, negotiating patient acceptance, enabling autonomy and empowerment, harnessing the power of fear, disappointment with futility of advice); recognizing and accepting patient capacities (ascertaining patient's drive for lifestyle change, conceding to ingrained habits, prioritizing urgent comorbidities, tailoring to patient environment and literacy); avoiding over-medicalization (averting long-term dependence on medications, preventing a false sense of security, minimizing stress of sickness); and minimizing economic burdens (avoiding unjustified costs to patients, delivering practice within budget, alleviating healthcare expenses).

**Conclusions:** GPs sought to empower patients to prevent CVD but the complexities of considering the patient's individual factors such as practical circumstances, and the economic implications of prescribing medications, were challenging. Community-based strategies for assessing CVD risk involving other health professionals, and decision aids that address the individuality of the patient's health and environment, may support GPs in their decisions regarding CVD prevention.



## ARTICLE SUMMARY

### Strengths and limitations of this study:

- Qualitative studies conducted in range of settings and populations were synthesized to generate a more comprehensive understanding of decision-making and approaches to CVD prevention among general practitioners.
- Some studies did not specify whether an absolute risk assessment or individual risk factor approach was used, and differences between perspectives on primary and secondary prevention were unclear.
- Non-english articles were excluded, which may limit the transferability of the article.

## INTRODUCTION

Cardiovascular disease (CVD) is the leading cause of global morbidity and mortality, contributing to over 30% of deaths worldwide(1-3). Cardiovascular events are highly preventable, through population and individual-level interventions such as smoking cessation, weight reduction, physical activity and exercise, and blood pressure and lipid lowering therapies(4).

High quality primary care is critical to CVD prevention(5, 6), due to the opportunity to assess risks and to provide lifestyle and pharmacological interventions. It is widely recommended that primary prevention of CVD be based on the assessment and management of absolute risk (7, 8), but there is evidence of research-practice gaps, with inconsistencies in the use of risk assessment tools and guidelines(8-10), advice on lifestyle interventions and prescription of preventive medications(11, 12).

While these shortfalls are likely to be due to many factors (5, 13) including challenges in managing diverse patient populations and variability in patient motivation(14), more detailed data on why this occurs at the healthcare provider level are limited, hindering practical strategies for improvement.

General practitioners (GPs) play a key role in assessment and management of CVD risk and qualitative studies have elucidated their perspectives on primary and secondary prevention of CVD. A synthesis of qualitative studies can generate a more comprehensive understanding of the reasons for decisions and approaches to CVD prevention across different settings and populations in primary care. We aimed to describe the spectrum of GP perspectives to inform strategies that may address concerns, uncertainties and the challenges in CVD prevention, to support decisions and implementation of evidence-based strategies for prevention of CVD and improved healthcare outcomes.

## METHODS

The reporting of this study follows the Enhancing Transparency of Reporting the Synthesis of Qualitative research (ENTREQ) framework(15) and the PRISMA checklist(16) (supplementary file 1)

### *Selection criteria*

Qualitative studies on the perspectives of GPs regarding the primary and secondary prevention of CVD were eligible for inclusion. GPs were defined as physicians who assumed responsibility for providing “continuing and comprehensive medical care to individuals, families, and communities”(17) and included primary care physicians and family practitioners. Studies published in peer-reviewed journals and doctoral dissertations were included. We excluded quantitative surveys, epidemiological studies (e.g. randomized trials), non-primary research articles (e.g. reviews), clinical guidelines, economic studies, and non-English articles to minimize misinterpretation in translation.

### *Data sources and searches*

We used a sensitive search strategy, which is provided in Supplementary File 2. Searches were conducted in MEDLINE, Embase, PsycINFO, and CINAHL from database inception to 3 November 2016. We searched the ProQuest Dissertation and Thesis database, British Library Electronic Digital Thesis Online Service (EThOS) and the Europe E-theses Portal for doctoral dissertations. Primary care journals, Google Scholar and reference lists of included studies were also searched. Titles and abstracts were screened by IJ who excluded studies that did not meet the inclusion criteria. The full texts of the remaining articles were assessed for eligibility.

### *Assessment of study reporting*

To evaluate comprehensiveness and transparency of reporting in each study, we used the Consolidated Criteria for Reporting Qualitative Health Research (COREQ). The framework included reporting items specific to the research team, study methods, context of the study, analysis, and interpretations. Three

1 reviewers (IJ, AJ, and CSH) independently assessed each study, and any inconsistencies were resolved  
2  
3 by discussion.  
4  
5

### 6 7 8 *Synthesis*

9  
10 Using thematic synthesis(18), we entered all the participant quotations and text from the “results”  
11 section of each paper into the software HyperRESEARCH (version 3.0.3, ResearchWare, Inc.  
12 Randolph, MA) to code the data. Author IJ read each article line-by-line and coded text into inductively  
13 derived concepts that reflected GPs’ perspectives on the prevention of CVD. Author IJ translated  
14 concepts within and across studies by interpreting the data from the primary studies and coded text to  
15 existing concepts (that had been identified in previous studies), or by creating a new concept (that was  
16 not identified in previous studies) when necessary. Similar concepts were grouped into themes. The  
17 preliminary themes were discussed with the research team (AJ, AT) who also read the included studies.  
18 This form of investigator triangulation ensures that the full range and depth of data reported in the  
19 original studies are captured in the analysis. We identified conceptual links and developed a thematic  
20 schema. We cross-tabulated the themes with primary and secondary prevention strategies for CVD (e.g.  
21 medications, lifestyle or behavior change, risk assessment tools, and service delivery models).  
22  
23  
24  
25  
26  
27  
28  
29  
30  
31  
32  
33  
34  
35  
36  
37

### 38 *Patients and public involvement*

39 Patients were not directly involved in this systematic review of general practitioners' perspectives on  
40 prevention of cardiovascular disease.  
41  
42  
43  
44

## 45 46 **RESULTS**

### 47 48 49 50 51 *Literature search*

52  
53 Of the 7,405 articles identified in the search,, we included 34 studies, involving more than 1,223 GPs  
54 (one study did not report the number of participants, FIGURE 1). The characteristics of the studies are  
55  
56  
57  
58  
59

1 provided in TABLE 1. Across the studies, interviews, focus groups and questionnaires with open ended  
2 questions were used to collect the data.  
3  
4  
5  
6  
7

### 8 *Comprehensiveness of reporting in included studies*

9

10 The comprehensiveness of reporting varied, with studies addressing 6 to 19 of the 24 criteria for  
11 reporting of qualitative studies (TABLE 2). The participant selection strategy and the participant  
12 characteristics were reported in all 34 (100%) studies. The duration and the venue of data collection  
13 was specified in 20 (59%) and 10 (29%) studies, respectively. Twenty eight (82%) studies reported  
14 researcher triangulation, and 17 (50%) studies reported on their use of software to facilitate data  
15 analysis. Quotations were provided in 30 (88%) studies.  
16  
17  
18  
19  
20  
21  
22  
23  
24

### 25 *Synthesis*

26

27 We identified six themes: defining own primary role; trusting external expertise; motivating behaviour  
28 change for prevention; recognizing and accepting patient capacities; avoiding medicalization; and  
29 minimizing economic burdens. Selected quotations for each theme are provided in TABLE 3. The  
30 relationships among themes are shown in FIGURE 2. FIGURE 3 shows a matrix of the themes that  
31 related to each CVD prevention strategy. Most studies did not specify if perspectives related to primary  
32 or secondary prevention or a specific population (e.g. high risk), however where possible these have  
33 been delineated in the synthesis.  
34  
35  
36  
37  
38  
39  
40  
41  
42  
43  
44

### 45 **Defining own primary role**

46  
47  
48

49 *Duty to prescribe medication:* Some GPs believed their core role, as a physician, was to “offer the  
50 tablets”(19) and prescribe medicines, whereas counseling patients to make lifestyle changes was a  
51 secondary focus. Preventive medication was perceived by some as being less imposing than lifestyle  
52 changes, as it would not impede on patients’ “quality of life”(20).  
53  
54  
55  
56  
57  
58  
59  
60

1 *Refraining from risking patients' lives:* Some GPs were highly cautious and wary of putting patients'  
2 lives at risk such that they exercised absolute "vigilance" (21) and advised patients to take preventive  
3 medications regardless of their risk of CVD. This was seen as more effective in preventing CVD-  
4 related death compared with recommendations for lifestyle change – "[GPs] would always recommend  
5 preventative medication to their patients, ... 'I don't take the slightest risk with someone else's  
6 life'"(22).  
7  
8  
9  
10  
11  
12  
13  
14  
15

16 *Partnering with specialists:* As patients at high risk of CVD often had comorbidities, some GPs "co-  
17 managed"(21) their patients with specialists. "Working together"(21) with specialists meant  
18 reinforcing, to the patient, the specialist's advice and GPs believed that this would strengthen cohesive  
19 care for the patient.  
20  
21  
22  
23  
24  
25  
26

27 *Delegating responsibility to patients:* Some GPs defined their role as an "influencer"(23) in their  
28 patients' self-motivation and management. They could only provide information but believed it was  
29 ultimately the patients' duty to make lifestyle changes or take their medication. Enforcing medications  
30 and behaviour change on patients was deemed unethical and not within their professional purview, and  
31 seen as "presumptuous to make such strong demands"(20).  
32  
33  
34  
35  
36  
37  
38  
39

40 *Providing holistic care:* Some GPs emphasised their desire to take on a generalist role by providing  
41 comprehensive care and being "carers for the total patient," which included taking responsibility for  
42 lifestyle, nutrition education, and prescribing medicine. Some GPs considered that this also involved  
43 "creating a positive expectation"(20), enabling the patient to feel optimistic about the preventive  
44 strategy outcomes, which was important for patient motivation.  
45  
46  
47  
48  
49  
50  
51  
52  
53  
54  
55  
56  
57  
58  
59  
60

## Trusting external expertise

*Depending on credible evidence and opinion:* Some GPs trusted research evidence and expert opinion to feel secure about their decisions. Guidelines, risk assessment tools, and “editorials in the [British Medical Journal] BMJ”(24) were seen to minimize room for human error and were more reliable than their own judgment - “I’m comfortable to be guided by the experts rather than try and invent too much on what might be dodgy assumptions on my part.”(25)

*Entrusting care to other health professionals:* Educating patients about diet and nutrition to prevent CVD was regarded by some as being “outside their interest and expertise”(23) and believed that dietitians or other clinicians were better able to inform patients about lifestyle changes. Some GPs were enthusiastic about a team-based approach to prevention involving trained practice nurses and lifestyle advisors due to time constraints in their own consultations (26). For patients with comorbidities, some GPs considered specialists (e.g. psychiatrists, cardiologists) to have more authority in educating their patients, as they had better knowledge of the patient’s condition and medication.

*Integrating into patient context:* Some GPs considered the patient’s family history and background when determining prevention strategies. They advocated the use of “human judgment,” which incorporated “emotional, political and logistical”(19) considerations rather than accepting risk scores unconditionally. Others were unwilling to use risk scores to estimate pre-treatment risk due to ambiguity of current guidelines regarding unique patient circumstances.

## Motivating behaviour change for prevention

*Highlighting tangible improvements:* Some GPs used visual prompts to demonstrate to their patients the direct improvements in health and decrease of risk scores, which could be achieved through

1 changes to lifestyle. They believed this approach encouraged patients to make active changes by giving  
2 them “something positive to cling to”(27).  
3  
4  
5  
6  
7

8 *Negotiating patient acceptance:* When developing a strategy for preventing CVD, some GPs perceived  
9 that compromise was necessary in encouraging patients to cooperate. An explicit discussion and  
10 consideration of the patient’s goals and priorities was seen to encourage patients to “work with the  
11 doctor, not against the doctor”(28) which built trust. Some GPs co-produced a strategy with the patient  
12 that was feasible for the patient’s own situation.  
13  
14  
15  
16  
17

18  
19  
20  
21 *Enabling autonomy and empowerment:* Some GPs noted that patients with a lower risk of CVD were  
22 highly anxious about their risk factors and responded by giving patients reassurance and control over  
23 their medication and lifestyle prevention strategies. GPs perceived that patients who had a sense of  
24 autonomy and empowerment over their bodies felt more secure and willing to manage their risk factors.  
25  
26  
27  
28  
29

30  
31 *Harnessing the power of fear:* When managing patients at high risk of CVD, some GPs felt that scaring  
32 patients into action was necessary and warranted. They believed that an emphasis on the consequences  
33 of disregarding and being non-adherent to prevention strategies motivated patients to accept their  
34 advice, telling their patients “if you don’t want that kind of scenario you do what I tell you”(27).  
35  
36  
37  
38  
39

40  
41  
42 *Disappointment with futility of advice:* When patients were seen to lack motivation and had “no  
43 intention of doing anything”, some GPs perceived that their efforts to encourage the patient’s uptake of  
44 prevention strategies were a “waste of time”. In failing to motivate patients, GPs questioned their  
45 ability to prevent CVD in their patients, being “[un]convinced that we do as much good as we like to  
46 think we do”(29).  
47  
48  
49  
50  
51  
52  
53  
54  
55  
56  
57  
58  
59  
60



## Recognizing and accepting patient capacities

*Ascertaining patients' drive for lifestyle change:* Some GPs felt they had to be realistic about their patients' desires to modify their daily lives, including changes to diet, physical activity and commencing a medication regimen. When patients seemed unwilling, GPs refrained from encouraging lifestyle changes or prescribing drugs, to save their own time and resources.

*Conceding to ingrained habits:* Some GPs believed that patients who had established long-term lifestyle patterns in life (particularly patients who were obese and elderly) were unlikely to alter their habits (e.g. smoking, diet), and so did not encourage lifestyle changes. They concluded that "medications are the only hope"<sup>(30)</sup> for patients who they believed were unable to adopt preventive behaviours.

*Prioritizing urgent comorbidities:* In patients with comorbidities (e.g. diabetes, mental illness), some GPs chose to delay prescribing strategies for CVD prevention to minimize the stress in patients of having to contend with multiple treatments. They focused on the patient's primary condition until they felt that the patient was emotionally and mentally prepared to discuss CVD prevention. For patients on medication for another disease, GPs were hesitant to prescribe more medication as they expected that the complexities of poly-pharmacy reduced overall adherence.

*Tailoring to patient environment and literacy:* Some GPs recognised that health literacy varied across the patient population and communicated the level of risk of CVD by using various approaches (e.g. statistics, visual graphs, simpler words) according to the patient's educational attainment and socioeconomic status. GPs took into account the patient's environment to ensure feasibility of enacting prevention strategies e.g. – "[the patient's neighborhood was not] conducive to making lifestyle behavioural changes" with "multiple fast food outlets"<sup>(31)</sup>.

## Avoiding over-medicalization

*Averting long-term dependence on medications:* Some GPs were concerned that most patients would be inclined to opt for medications as an immediate and easy solution, rather than make lifestyle changes. This was attributed to the marketing and widespread advertising of medications in the general public. They believed that giving young patients or patients who were not at high risk a lifetime prescription of medicine for preventive purposes should be avoided by encouraging lifestyle changes instead, to prevent a dependence on medications when it was not absolutely necessary.

*Preventing a false sense of security:* Some GPs were cautious and critical of “medicaliz[ing] an unhealthy lifestyle”(20) as this encouraged patients to continue with their harmful habits (e.g. sedentary lifestyle, poor diet, smoking) and “forget about their lipid-lowering diet”(32). They noted that patients trusted the medicine to reduce their risk of CVD in spite of their lifestyle choices. With reference to medications and lifestyle modification, GPs believed that “you cannot do one thing without the other”(33) and refrained from over-prescribing medicine to prevent patients from believing that they were “immortal”(32).

*Minimizing stress of sickness:* Regardless of the patient’s level of risk for CVD, some GPs urged to avoid instilling unnecessary anxiety in patients, as “fear becomes a major problem”(29) and in turn elevates their risk further. They were hesitant to “turn individuals into patients”(19) in the context of primary prevention for patients with low risk, as tests and preventive medications heightened their anxiety about their health. For example, a GP expected that a patient with high cholesterol would be conscious of their condition, and alerting them to their risk of heart attack would “get themselves into more of a state”(27).

## 1 **Minimizing economic burdens**

2  
3  
4  
5  
6 *Avoiding unjustified costs to patients:* Some GPs especially in low socio-economic regions like  
7 Guatemala were mindful of the economic burden of long-term medication on patients and thus  
8 prescribed medications only for patients at high risk as determined by their cholesterol or blood  
9 pressure. Some were also conscious and expressed concerns about the commercial interests of  
10 pharmaceutical companies – “95% of treatment with statins is wasted” and “fuelled by the interests of  
11 the pharmaceutical industry”(22). However, others believed in the long term cost effectiveness of  
12 preventive medicine in minimizing the potential for incurring costs for treatment of CVD.  
13  
14  
15  
16  
17  
18  
19  
20  
21  
22

23 *Delivering practice within budget:* Some GPs in studies conducted in the UK and New Zealand were  
24 careful not to exceed their budget for drug prescriptions, and they were conscious of the limitations of  
25 funding available for their practice, which contended with external pressures (from pharmaceutical  
26 companies, health advertising) to offer drug treatment. GPs were more inclined to prescribe medicine  
27 for secondary prevention of CVD or for primary prevention in patients with a high risk of CVD to  
28 ensure an adequate budget for other patients in their practice.  
29  
30  
31  
32  
33  
34  
35  
36  
37

38 *Alleviating healthcare expenses:* Some GPs perceived preventive procedures (blood tests, routine  
39 checks) to be a healthcare burden when the whole population was screened regardless of risk levels or  
40 immediate illnesses. This placed them under increasing pressure due to a greater demand for general  
41 screening. They were mindful of the resources and nurse time as well as their own time spent screening  
42 for risks for primary prevention in low-risk patients, as this detracted from resources available for  
43 patients who were “actually ill”(29).  
44  
45  
46  
47  
48  
49  
50  
51  
52  
53  
54  
55  
56  
57  
58  
59  
60

## DISCUSSION

Primary care healthcare providers believed that patients needed to be empowered to continue with medications and be motivated to make lifestyle changes for the prevention of CVD, but were challenged by the complexities of considering the patient's cognitive capacities, practical circumstances, and health status. Some articulated a professional and ethical duty, to prescribe medications for prevention of CVD and subsequently minimize the risk of future CVD events that could be preventable, and to avoid taking any responsibility for risking the patients' lives. However, some had concerns about prescribing patients long-term medications, particularly in the context of primary prevention and among patients who were not deemed to be at high risk of CVD.

Providers considered preventive strategies in the context of tensions between respecting patient autonomy and being too intrusive and paternalistic in recommending behaviour change. In making decisions about prescribing medication therapy, they considered the economic impact on their local practice (particularly in the UK) and broader healthcare costs, and specifically in terms of prioritising resources for patients with more urgent illnesses than to those who were asymptomatic with risk factors.

Differences in perspectives among GPs were apparent, in part reflecting their region of practice, sociodemographics of their patient population, and the use of an absolute CVD or individual risk factor approach. In studies conducted in New Zealand, the UK and Guatemala, GPs deliberated on the financial burden of screening in the general population for primary prevention and costs of medications incurred to their patients as well as their own practice. Some GPs who practiced in low socioeconomic areas believed that advising lifestyle changes, particularly in terms of diet, were futile as they believed that patients had limited access to healthy food in their local area. In earlier studies, GPs expressed more hesitation about prescribing medications, when this was not yet common practice nor widely recommended for primary prevention (20, 25, 34). The majority of studies did not specify whether GPs

1 used an absolute risk or individual risk factor approach to management, and did not detail the risk  
2 profile of their patients (i.e. level of risk of CVD) when discussing preventive strategies. The concept  
3 of absolute risk was explicitly discussed in 17 (53%) studies, and these studies were focused on GPs  
4 perspectives on tools for assessing absolute risk for CVD prevention.  
5  
6  
7  
8  
9

10  
11  
12 Our study provides insights on the variability in decisions and approaches to CVD prevention among  
13 GPs. Approximately half of GPs use cardiovascular risk calculators and clinical guidelines (35), and  
14 those who do not use them have cited reasons including difficulties in using and interpreting the tools,  
15 and lack of applicability to their patient population in terms of age, socioeconomic background and  
16 family history. Our findings indicate that GPs may prefer to make their own judgment of individual  
17 risk factors acquired through experience rather than using absolute risk assessment tools.  
18  
19  
20  
21  
22  
23  
24  
25

26  
27 While a vast majority of GPs would recommend drug prescription where appropriate, this does not  
28 necessarily translate into rates of actual prescription. For example, a study in the UK found that only  
29 42% of patients eligible for lipid lowering drugs were prescribed them (12, 36). Our findings suggests  
30 that GPs' decisions to prescribe medication can be influenced by their perception of how likely the  
31 patient is willing to commence the regimen and how likely they are to adhere to medications. Also,  
32 some GPs expressed reluctance to "medicalize" unhealthy lifestyles and foster a false sense of security  
33 in patients through medication.  
34  
35  
36  
37  
38  
39  
40  
41  
42  
43

44 A recent study found that more than half of GPs rated their ability to motivate behaviour change for  
45 CVD prevention as being 'not good', particularly for patients who were over 65, male or obese (37).  
46 Our findings indicate that GPs believe that it may be difficult to motivate change in patients with  
47 established lifestyle habits, particularly in older or obese patients, and need a more immediate solution  
48 such as medication.  
49  
50  
51  
52  
53  
54  
55  
56  
57  
58  
59  
60

1 The themes identified in our synthesis reflect findings from studies of GPs' perspectives on the  
2 prevention of other chronic conditions such as diabetes. In a study on the prevention of type 2  
3 diabetes(38), GPs questioned their role and obligation in preventive care, where some expressed  
4 frustration at the societal pressure placed upon them to screen patients for health risks despite the lack  
5 of funding and resources. They believed that education about healthy lifestyles should be delivered via  
6 schools and community programs. Similarly, some GPs felt pressure from pharmaceutical companies to  
7 prescribe medication despite a limited budget for prescriptions within their own practice(29, 40, 67).  
8 Instead, they preferred assistance from and delegation to specialists, nursing staff and dieticians. In the  
9 context of diabetes, GPs were also concerned that resources in general practice were increasingly  
10 directed towards management of diabetes, leading to the specialization of staff (nurses, general  
11 practitioners) and a phasing out of general practice nurses. GPs similarly wanted to retain a generalist  
12 role in CVD prevention and provide comprehensive care involving all aspects of preventative health  
13 rather than a single focus on prevention of CVD(20).  
14  
15  
16  
17  
18  
19  
20  
21  
22  
23  
24  
25  
26  
27  
28  
29  
30

31 Our synthesis captured a broad range of the perspectives of GPs across different settings, and included  
32 attitudes pertaining to various CVD prevention strategies. However, there are some potential  
33 limitations. We were unable to differentiate whether GPs were using an absolute risk assessment or an  
34 individual risk factor approach, and whether perspectives were different in primary and secondary  
35 prevention, as these were not specified in most studies. Non-English articles were excluded, which  
36 could limit the transferability of the findings.  
37  
38  
39  
40  
41  
42  
43  
44  
45  
46

47 Based on our findings, we suggest adapting or developing risk assessment tools that incorporate patient  
48 factors, motivating behaviour change in patients, and ensuring adoption of cost-effective strategies in  
49 prescribing medications. In preventive care, treatment of individual risk factors may still be used over  
50 absolute risk assessment, with low uptake of risk assessment tools(7, 8, 39). Greater use of absolute  
51 risk assessment tools and guidelines that explicitly address patient factors such as socioeconomic  
52 status, family history and lifestyle choices may be more useful for GPs(40-42). Motivating adherence  
53  
54  
55  
56  
57  
58  
59

1 for both behavioural and pharmaceutical changes remains a challenge for GPs. Despite behaviour  
2  
3 change being a highly cost effective prevention strategy(43, 44), patient motivation and adherence to  
4  
5 lifestyle advice is a barrier to preventive care (45-48). A multifaceted approach in a primary care  
6  
7 setting involving supervised exercise sessions, follow up calls and timed medication reminders in  
8  
9 addition to current GP services can improve patients' adherence to prescribed medication and  
10  
11 behavioural changes, whilst addressing barriers such as time and resource constraints for GPs. Recent  
12  
13 lifestyle intervention trials in a primary care setting revealed reductions in individual risk factors (blood  
14  
15 pressure, obesity, cholesterol), and improvements in total mortality as well as fatal and non-fatal  
16  
17 cardiovascular events(49-54). Recent reviews of interventions revealed that most of those resulting in  
18  
19 long-term patient adherence to behavioural changes included other health care professionals such as  
20  
21 nurses, pharmacists and therapists, involving more convenient care (for individual patients),  
22  
23 reinforcement of lifestyle advice, family and psychological therapy, telephone follow-up and  
24  
25 technological supportive care (Fitbits, text messaging, apps)(55-58).  
26  
27  
28  
29  
30

31 Our study also identified some research gaps, including perspectives on total (absolute) or individual  
32  
33 (relative) risk assessment, effects of long term dependence on medication and guidelines for  
34  
35 prescription in primary care. When referring specifically to absolute CVD risk, some GPs discussed  
36  
37 absolute risk assessment tools, but did not talk in depth about the concept of absolute risk and how they  
38  
39 considered this in their decision-making and practice. A distinction between assessing absolute risk and  
40  
41 individual risk factors is important in allowing for a more consistent and evidence-based evaluation for  
42  
43 treatment plans. Current studies also did not address primary prevention in depth specifically, and some  
44  
45 GPs expressed hesitation when providing primary preventive care to patients as they questioned the  
46  
47 necessity for medication in asymptomatic patients and based on theoretical risk. Greater awareness of  
48  
49 and adherence to evidence-based guidelines on medications for asymptomatic patients and risk factors  
50  
51 may improve consistency of evaluating and managing CVD risk in patients(5, 7). Further studies could  
52  
53 also address the role of social or family support in CVD prevention, and also their perspectives on  
54  
55 gender-specific concerns or challenges.  
56  
57  
58  
59  
60

1  
2  
3 GPs believed that empowering patients to prevent CVD through adherence to lifestyle and medications  
4 was needed, but found it challenging to motivate behaviour change. Some considered that clinical  
5  
6 decision-making for CVD prevention involved the patients' life stage and circumstances, capacity for  
7  
8 self-management and their environment; which were not addressed in risk assessment and decision  
9  
10 making tools. Greater availability and adaptability of evidence-based strategies for assessing and  
11  
12 managing CVD risk, including behaviour change in patients, may support decisions and  
13  
14 implementation of CVD prevention activities among GPs.  
15  
16  
17  
18  
19  
20

### 21 **Acknowledgements**

22  
23 We thank all participants for sharing their interesting thoughts and perspectives for this study.  
24  
25  
26

### 27 **Contributions**

28  
29 IJ participated in the design of the search strategy, conducted the search, screened the studies, carried  
30  
31 out thematic analysis and drafted the manuscript. AT designed the search strategy, participated in the  
32  
33 thematic analysis and was the primary reviewer for the manuscript. EB, BC, AJ, JA, RK, TU, KM, CH,  
34  
35 and JC provided a critical review of the manuscript, and provided final approval of the version to be  
36  
37 published.  
38  
39  
40  
41

### 42 **Ethics approval**

43  
44 This study did not require an ethics approval  
45  
46  
47  
48

### 49 **Funding statement:**

50  
51 The work was supported by a National Health and Medical Research Council of Australia Partnership  
52  
53 Grant [1092674], including support from the National Heart Foundation of Australia. AT is supported  
54  
55 by a NHMRC Fellowship [1106716].  
56  
57  
58  
59  
60



1  
2  
3  
4  
5  
6  
7  
8  
9  
10  
11  
12  
13  
14  
15  
16  
17  
18  
19  
20  
21  
22  
23  
24  
25  
26  
27  
28  
29  
30  
31  
32  
33  
34  
35  
36  
37  
38  
39  
40  
41  
42  
43  
44  
45  
46  
47  
48  
49  
50  
51  
52  
53  
54  
55  
56  
57  
58  
59  
60

**Declaration of competing interests**

The authors do not have any competing interests or conflicts of interest to declare

**Data sharing**

No additional data are available

For peer review only

## References

1. O'Rourke K, VanderZanden A, Shepard D. Cardiovascular Disease Worldwide, 1990-2013. *J Am Med Assoc.* 2015;314(18 ).
2. WHO. Cardiovascular diseases (CVDs). 2016.
3. Deaton C, Froelicher E, Wu L, et al. The global burden of cardiovascular disease. *Eur J Cardiovasc Nurs.* 2011;10 (Suppl 2):S5-13.
4. Ezzati M, Obermeyer Z, Tzoulaki I, et al. Contributions of risk factors and medical care to cardiovascular mortality trends. *Nat Rev Cardiol.* 2015;12:508-30.
5. Volker N, Davey R, Cochrane T, et al. Improving the Prevention of Cardiovascular Disease in Primary Health Care: The Model for Prevention Study Protocol. *J Med Internet Res.* 2014;3(3):e33.
6. Harris M, Lloyd J. The role of Australian primary health care in the prevention of chronic disease *ADMA.* 2012 September 28.
7. Jansen J, Bonner C, McKinn S, et al. General practitioners' use of absolute risk versus individual risk factors in cardiovascular disease prevention: an experimental study. *BMJ open.* 2014;15(4).
8. Gupta R, Stocks N, Broadbent J. Cardiovascular risk assessment in Australian General Practice. *Aust Fam Physician.* 2009;38(5):364-8.
9. Dallongeville J, Banegas JR, Halcox J, et al. Physicians' attitudes towards cardiovascular guidelines and risk assessment tools: Relation with the management of risk factors in the primary prevention setting. *Eur Heart J.* 2011;32:973.
10. Bell A. How Does the Use of Atrial Fibrillation Patient Tools for Stroke & Bleeding Risk Assessment (CHADS2/CHADSVASC/HAS-BLED) in Canada Impact Prescribing Habits? *Can J Cardiol.* 2012;28(5).
11. Kones R. Rosuvastatin, inflammation, C-reactive protein, JUPiTeR, and primary prevention of cardiovascular disease – a perspective. *Drug Des Devel Ther.* 2010;4:383-413.
12. Wutzler A, Bannehr M, Pohlmann AC, et al. The use of direct oral anticoagulants for stroke prevention in atrial fibrillation: A study on physicians' perspective and preferences. *Int J Cardiol.* 2014;175(1):188-91.
13. Haigh K, Bingley J, Golledge J, et al. Barriers to screening and diagnosis of peripheral artery disease by general practitioners. *Vasc Med.* 2013;18(6):325-30.
14. Jansen J, McKinn S, Bonner C, et al. General Practitioners' Decision Making about Primary Prevention of Cardiovascular Disease in Older Adults: A Qualitative Study. *PLoS One.* 2017;12(1):e0170228.

- 1 15. Tong A, Flemming KD, McInnes E, et al. Enhancing Transparency in reporting the synthesis of  
2 qualitative research: ENTREQ. *BMC Med Res Methodol.* 2012;12(181).
- 3  
4  
5 16. Moher D, Liberati A, Tetzlaff J, Altman DG, The PRISMA Group (2009). Preferred Reporting Items for  
6 Systematic Reviews and Meta-Analyses: The PRISMA Statement. *BMJ* 2009;339:b2535
- 7  
8  
9 17. OECD. OECD Health Statistics 2016. Definitions, Sources and Methods. 2016
- 10  
11 18. Thomas J, Harden A. Methods for the thematic synthesis of qualitative research in systematic reviews.  
12 *BMC Med Res Methodol.* 2008;8(45).
- 13  
14  
15 19. Greenfield S, Bryan S, Gill P, et al. Factors influencing clinicians' decisions to prescribe medication to  
16 prevent coronary heart disease. *J Clin Pharm Ther.* 2005;30(1):77-84.
- 17  
18  
19 20. Silwer L, Wahlstrom R, Lundborg CS. Views on primary prevention of cardiovascular disease--an  
20 interview study with Swedish GPs. *BMC Fam Pract.* 2010;11:44.
- 21  
22  
23 21. Bartels CM, Roberts TJ, Hansen KE, et al. Rheumatologist and Primary Care Management of  
24 Cardiovascular Disease Risk in Rheumatoid Arthritis: Patient and Provider Perspectives. *Arthritis Care Res.*  
25 2016;68(4):415-23.
- 26  
27  
28  
29 22. Gale NK, Greenfield S, Gill P, et al. Patient and general practitioner attitudes to taking medication to  
30 prevent cardiovascular disease after receiving detailed information on risks and benefits of treatment: a  
31 qualitative study. *BMC Fam Pract.* 2011;12:59.
- 32  
33  
34  
35 23. Pomeroy SE, Worsley A. Nutrition care for adult cardiac patients: Australian general practitioners'  
36 perceptions of their roles. *Fam Pract.* 2008;25 Suppl 1:i123-9.
- 37  
38  
39 24. Fairhurst K, Huby G. From trial data to practical knowledge: qualitative study of how general  
40 practitioners have accessed and used evidence about statin drugs in their management of hypercholesterolaemia.  
41 *BMJ.* 1998;317(7166):1130-4.
- 42  
43  
44  
45 25. Bonner C, Jansen J, McKinn S, et al. General practitioners' use of different cardiovascular risk  
46 assessment strategies: a qualitative study. *Med J Aust.* 2013;199(7):485-9.
- 47  
48  
49 26. Volker N, Williams LT, Davey RC, et al. Implementation of cardiovascular disease prevention in  
50 primary health care: enhancing understanding using normalisation process theory. *BMC Fam Pract.*  
51 2017;18(28).
- 52  
53  
54  
55  
56  
57  
58  
59  
60

- 1  
2  
3  
4  
5  
6  
7  
8  
9  
10  
11  
12  
13  
14  
15  
16  
17  
18  
19  
20  
21  
22  
23  
24  
25  
26  
27  
28  
29  
30  
31  
32  
33  
34  
35  
36  
37  
38  
39  
40  
41  
42  
43  
44  
45  
46  
47  
48  
49  
50  
51  
52  
53  
54  
55  
56  
57  
58  
59  
60
27. Bonner C, Jansen J, McKinn S, et al. Communicating cardiovascular disease risk: an interview study of General Practitioners' use of absolute risk within tailored communication strategies. *BMC Fam Pract*. 2014;15:106.
28. Wan Q, Harris MF, Zwar N, et al. Prerequisites for implementing cardiovascular absolute risk assessment in general practice: a qualitative study of Australian general practitioners' and patients' views. *J Eval Clin Pract*. 2010;16(3):580-4.
29. Williams SJ, Calnan M. Perspectives on prevention: the views of General Practitioners. *Sociol Health Illn*. 1994;16(3):372-93.
30. Speechly C, Bridges-Webb C, McKenzie S, et al. Patient and general practitioner attitudes to healthy lifestyle behaviours and medication following coronary heart disease: an exploratory study. *Aust J Prim Health*. 2010;16(2):154-8.
31. Doolan-Noble F, Tracey J, Mann S. Why are there gaps in our management of those with high cardiovascular risk? *J Prim Health Care*. 2012;4(1):21-9.
32. Kedward J, Dakin L. A qualitative study of barriers to the use of statins and the implementation of coronary heart disease prevention in primary care. *Br J Gen Pract*. 2003;53(494):684-9.
33. Bonner C, Jansen J, McKinn S, et al. How do general practitioners and patients make decisions about cardiovascular disease risk? *Health Psychol*. 2015;34(3):253-61.
34. Pharm E, Rolandsson O, Johansson EE. 'Aiming for the stars - GPs' dilemmas in the prevention of cardiovascular disease in type 2 diabetes patients: Focus group interviews. *Fam Pract*. 2009;26(2):109-14.
35. Schmieder RE, Goebel M, Bramlage P. Barriers to cardiovascular risk prevention and management in Germany – an analysis of the EURIKA study. *Vasc Health Risk Manag*. 2012;8:177-86.
36. Wu J, Zhu S, Yao G, et al. Patient Factors Influencing the Prescribing of Lipid Lowering Drugs for Primary Prevention of Cardiovascular Disease in UK General Practice: A National Retrospective Cohort Study. *PLoS One*. 2013;8(7):e67611.
37. Diehl K, Mayer M, Mayer F, et al. Physical activity counseling by primary care physicians: attitudes, knowledge, implementation, and perceived success. *J Phys Act Health*. 2015;12(2):216-23.
38. Williams R, Rapport F, Elwyn G, et al. The prevention of type 2 diabetes: general practitioner and practice nurse opinions. *Br J Gen Pract*. 2004;54(504):531-5.
39. Chauhan U. Cardiovascular disease prevention in primary care. *Br Med Bull* 2007;81-82(1):65-79.

- 1 40. Goff DC, Lloyd-Jones D, Bennett G, et al. ACC/AHA guideline on the assessment of cardiovascular  
2 risk: A report of the American College of Cardiology/American Heart Association Task Force on Practice  
3 Guidelines. *Circ*. 2013;129:S49-S73.  
4  
5  
6  
7 41. Anderson T, Grégoire J, Hegele R, et al. 2012 Update of the Canadian Cardiovascular Society  
8 Guidelines for the Diagnosis and Treatment of Dyslipidemia for the Prevention of Cardiovascular Disease in the  
9 Adult. *Can J Cardiol*. 2013;29:151-67.  
10  
11  
12  
13 42. Piepoli M, Hoes A, Agewall S, et al. 2016 European Guidelines on cardiovascular disease prevention in  
14 clinical practice. *Eur Heart J*. 2016;37:2315-81.  
15  
16  
17 43. WHO. Obesity: Preventing and Managing the Global Epidemic. 1998(894).  
18  
19 44. Mills KT, Dolan J, Bazzano LA, et al. Comprehensive Approach for Hypertension Control in Low-Income  
20 Populations: Rationale and Study Design for the Hypertension Control Program in Argentina. *Am J Med Sci*.  
21 2014;348(2):139-45.  
22  
23  
24  
25 45. Barfoed BL, Paulsen MS, Christensen PM, et al. Associations between patients' adherence and GPs'  
26 attitudes towards risk, statin therapy and management of non-adherence--a survey and register-based study. *Fam*  
27 *Pract*. 2016;33(2).  
28  
29  
30  
31 46. Koelewijn-van Loon MS, van Steenkiste B, Ronda G, et al. Improving patient adherence to lifestyle  
32 advice (IMPALA): a cluster-randomised controlled trial on the implementation of a nurse-led intervention for  
33 cardiovascular risk management in primary care. *BMC Health Serv Res*. 2008;8(9).  
34  
35  
36  
37 47. Sebaste E, WHO. Adherence to long-term therapies. Evidence for action. WHO 2003.  
38  
39 48. Hobbs FD, Erhardt L. Acceptance of guideline recommendations and perceived implementation of  
40 coronary heart disease prevention among primary care physicians in five European countries: the Reassessing  
41 European Attitudes about Cardiovascular Treatment (REACT) survey. *Fam Pract*. 2002;19(6):596-604.  
42  
43  
44  
45 49. Ebrahim S, Taylor F, Ward K, et al. Multiple risk factor interventions for primary prevention of  
46 coronary heart disease. *Cochrane Database Syst Rev*. 2011;1(CD001561).  
47  
48  
49 50. Eriksson M, Franks P, Eliasson M. A 3-year randomized trial of lifestyle intervention for cardiovascular  
50 risk reduction in the primary care setting: the Swedish Bjorknas study. *PLoS One*. 2009 4(4):e5195.  
51  
52  
53 51. Folta S, Lichtenstein A, Seguin R, et al. The StrongWomen-Healthy Hearts program: reducing  
54 cardiovascular disease risk factors in rural sedentary, overweight, and obese midlife and older women. *Am J*  
55 *Public Health*. 2009;99(7):1271-7.  
56  
57  
58  
59  
60

- 1  
2  
3  
4  
5  
6  
7  
8  
9  
10  
11  
12  
13  
14  
15  
16  
17  
18  
19  
20  
21  
22  
23  
24  
25  
26  
27  
28  
29  
30  
31  
32  
33  
34  
35  
36  
37  
38  
39  
40  
41  
42  
43  
44  
45  
46  
47  
48  
49  
50  
51  
52  
53  
54  
55  
56  
57  
58  
59  
60
52. Wister A, Loewen N, Kennedy-Symonds H, et al. One-year follow-up of a therapeutic lifestyle intervention targeting cardiovascular disease risk. *CMAJ*. 2007;177(8):859-65.
53. Alliance NVDP. Guidelines for the management of absolute cardiovascular risk 2012.
54. Murphy E, Vellinga A, Byrne M, et al. Primary care organisational interventions for secondary prevention of ischaemic heart disease: a systematic review and meta-analysis. *Br J Gen Pract*. 2015;65(636):e460-e8.
55. Haynes R, Ackloo E, Sahota N, et al. Interventions for enhancing medication adherence. *Cochrane Database Syst Rev*. 2008;2(CD000011).
56. Glynn L, Murphy A, Smith S, et al. Interventions used to improve control of blood pressure in patients with hypertension. *Cochrane Database Syst Rev*. 2010 3(CD005182).
57. Ogedegbe G, Schoenthaler A. A systematic review of the effects of home blood pressure monitoring on medication adherence. *J Clin Hypertens* (Greenwich). 2006;8(3):174-80.
58. Khan N, Marvel FA, Wang J, et al. Digital Health Technologies to Promote Lifestyle Change and Adherence. *Curr Treat Options Cardio Med*. 2017;19(60).
59. Liu H, Massi L, Laba TL, et al. Patients' and providers' perspectives of a polypill strategy to improve cardiovascular prevention in Australian primary health care: a qualitative study set within a pragmatic randomized, controlled trial. *Circ Cardiovasc Qual Outcomes*. 2015;8(3):301-8.
60. Wan Q, Harris MF, Zwar N, et al. Sharing risk management: an implementation model for cardiovascular absolute risk assessment and management in Australian general practice. *Int J Clin Pract*. 2008;62(6):905-11.
61. Lebeau JP, Cadwallader JS, Vaillant-Roussel H, et al. General practitioners' justifications for therapeutic inertia in cardiovascular prevention: An empirically grounded typology. *BMJ Open*. 2016;6(5).
62. Montano C, Estrada K, Chavez A, et al. Perceptions, knowledge and beliefs about prevention of cardiovascular diseases in Villa Nueva, Guatemala. *Prev Control*. 2008;3:1-9.
63. Nielen MM, Assendelft WJ, Drenthen AJ, et al. Primary prevention of cardio-metabolic diseases in general practice: a Dutch survey of attitudes and working methods of general practitioners. *Eur J Gen Pract*. 2010;16(3):139-42.
64. Sapre N, Mann S, Elley CR. Doctors' perceptions of the prognostic benefit of statins in patients who have had myocardial infarction. *Int Med J*. 2009;39(5):277-82.

- 1  
2  
3  
4  
5  
6  
7  
8  
9  
10  
11  
12  
13  
14  
15  
16  
17  
18  
19  
20  
21  
22  
23  
24  
25  
26  
27  
28  
29  
30  
31  
32  
33  
34  
35  
36  
37  
38  
39  
40  
41  
42  
43  
44  
45  
46  
47  
48  
49  
50  
51  
52  
53  
54  
55  
56  
57  
58  
59  
60
65. Torley D, Zwar N, Comino EJ, et al. GPs' views of absolute cardiovascular risk and its role in primary prevention. *Aust Fam Physician*. 2005;34(6):503-4, 7.
66. Weiner M, Wells S, Kerse N. Perspectives of general practitioners towards evaluation and treatment of cardiovascular diseases among older people. *J Prim Health Care*. 2009;1(3):198-206.
67. Wahlstrom R, Owe Dahlgren L, Tomson G, et al. Perspectives on prevention: the views of General Practitioners. *Adv Health Sci Educ*. 1997;2:221-36.
68. Fisseni G, Lewis DK, Abholz HH. Understanding the concept of medical risk reduction: a comparison between the UK and Germany. *Eur J Gen Pract*. 2008;14(3-4):109-16.
69. Lewis DK, Robinson J, Wilkinson E. Factors involved in deciding to start preventive treatment: qualitative study of clinicians' and lay people's attitudes. *BMJ*. 2003;327(7419):841.
70. Liew SM, Blacklock C, Hislop J, et al. Cardiovascular risk scores: qualitative study of how primary care practitioners understand and use them. *Br J Gen Pract*. 2013;63(611):e401-7.
71. Macintosh MJ, Lacey EA, Tod AM. Secondary prevention for coronary heart disease: a qualitative study. *Br J Nurs*. 2003;12(8):462-9.
72. Summerskill WS, Pope C. 'I saw the panic rise in her eyes, and evidence-based medicine went out of the door.' An exploratory qualitative study of the barriers to secondary prevention in the management of coronary heart disease. *Fam Pract*. 2002;19(6):605-10.
73. Virdee SK, Greenfield SM, Fletcher K, et al. Would primary healthcare professionals prescribe a polypill to manage cardiovascular risk? A qualitative interview study. *BMJ Open*. 2013;3(3).
74. Wright CA, Osborn DPJ, Nazareth I, et al. Prevention of coronary heart disease in people with severe mental illnesses: A qualitative study of patient and professionals' preferences for care. *BMC Psychiatry*. 2006;6(16).
75. Rosal MC, Ockene JK, Luckmann R, et al. Coronary heart disease multiple risk factor reduction providers' perspectives. *Am J Prev Med* 2004;27(2S):54-60.
76. Tanner RM, Safford MM, Monda KL, et al. Primary care physician perspectives on barriers to statin treatment. *Cardiovasc Drugs Ther*. 2017;31:303-9.
77. Wright FL, Wiles RA, Moher M, Strategies ATCGAoI. Patients' and practice nurses' perceptions of secondary preventive care for established ischaemic heart disease: a qualitative study. *J Clin Nurs*. 2001;10(2):180-8.

1 **Figure legends**  
2  
3

4 **FIGURE 1. Search results**  
5

6 **FIGURE 2. Matrix of preventions strategies and themes**  
7

8 **FIGURE 3. Thematic schema**  
9  
10  
11  
12  
13  
14  
15  
16  
17  
18  
19  
20  
21  
22  
23  
24  
25  
26  
27  
28  
29  
30  
31  
32  
33  
34  
35  
36  
37  
38  
39  
40  
41  
42  
43  
44  
45  
46  
47  
48  
49  
50  
51  
52  
53  
54  
55  
56  
57  
58  
59  
60

For peer review only



TABLE 1. Characteristics of included studies

| Study ID                      | GPs (n*) | Patient population             | Prevention |           | Risk     |          | Conceptual methodological framework | Data collection                              | Analysis            | CVD prevention topic area and scope |
|-------------------------------|----------|--------------------------------|------------|-----------|----------|----------|-------------------------------------|----------------------------------------------|---------------------|-------------------------------------|
|                               |          |                                | Primary    | Secondary | Absolute | Relative |                                     |                                              |                     |                                     |
| <b>Australia</b>              |          |                                |            |           |          |          |                                     |                                              |                     |                                     |
| Bonner 2013 <sup>(25)</sup>   | 25       | General                        | NS         |           | •        |          | Phenomenological                    | Semi-structured interview                    | Framework analysis  | Risk assessment                     |
| Bonner 2014 <sup>(27)</sup>   | 25       | General                        | NS         |           | •        |          | Qualitative                         | Semi-structured interview                    | Framework analysis  | Risk assessment                     |
| Bonner 2015 <sup>(33)</sup>   | 25       | General                        | NS         |           | •        |          | Qualitative                         | Semi-structured interview                    | Framework analysis  | Risk assessment                     |
| Liu 2015 <sup>(59)</sup>      | 25       | Indigenous                     | •          |           | •        |          | Qualitative                         | Semi-structured interviews                   | Thematic analysis   | Medication                          |
| Pomeroy 2008 <sup>(23)</sup>  | 30       | General                        | NS         |           | NS       |          | Multi methods                       | Semi-structured interviews and questionnaire | Conceptual analysis | Lifestyle change                    |
| Speechly 2010 <sup>(30)</sup> | 8        | Primary coronary heart disease |            | •         | •        |          | Qualitative                         | Semi-structured interviews                   | Thematic analysis   | Lifestyle change/ Medication        |
| Volker 2017 <sup>(26)</sup>   | 11       | General                        | •          |           | •        |          | Qualitative                         | Semi-structured interviews                   | Framework analysis  | Risk assessment                     |
| Wan 2008 <sup>(60)</sup>      | 22       | High risk CV factor            | •          |           | •        |          | Qualitative                         | Focus groups and semi structured interview   | Thematic analysis   | Risk assessment                     |
| Wan 2010 <sup>(28)</sup>      | 22       | High risk CV factor            | •          |           | •        |          | Qualitative                         | Focus groups                                 | Thematic analysis   | Risk assessment                     |
| <b>France</b>                 |          |                                |            |           |          |          |                                     |                                              |                     |                                     |
| Lebeau 2016 <sup>(61)</sup>   | 125      | High risk hypertensive         | •          |           | NS       |          | Qualitative                         | Open ended questionnaire                     | Thematic analysis   | Medication                          |
| <b>Guatemala</b>              |          |                                |            |           |          |          |                                     |                                              |                     |                                     |
| Montano 2008 <sup>(62)</sup>  |          | General                        | NS         |           | NS       |          | Qualitative                         | Focus group discussions and in-depth         | Thematic analysis   | Lifestyle change                    |

1  
2  
3  
4  
5  
6  
7  
8  
9  
10  
11  
12  
13  
14  
15  
16  
17  
18  
19  
20  
21  
22  
23  
24  
25  
26  
27  
28  
29  
30  
31  
32  
33  
34  
35  
36  
37  
38  
39  
40  
41  
42  
43  
44  
45  
46  
47

|                                   |     |                               |    |   |    |   |                   |                                                     |                              |                                |
|-----------------------------------|-----|-------------------------------|----|---|----|---|-------------------|-----------------------------------------------------|------------------------------|--------------------------------|
|                                   |     |                               |    |   |    |   |                   | interviews                                          |                              |                                |
| <b>Netherlands</b>                |     |                               |    |   |    |   |                   |                                                     |                              |                                |
| Nielen 2010 <sup>(63)</sup>       | 330 | General                       | •  |   | NS |   | Qualitative       | Open ended questionnaire                            | Thematic analysis            | Lifestyle change               |
| <b>New Zealand</b>                |     |                               |    |   |    |   |                   |                                                     |                              |                                |
| Doolan-Noble 2012 <sup>(31)</sup> | 29  | High CVD risk                 | •  |   | •  |   | Qualitative       | Focus group                                         | Thematic analysis            | barriers and facilitators      |
| Sapre 2009 <sup>(64)</sup>        | 20  | Primary myocardial infarction |    | • | •  | • | Qualitative       | Semi-structured interview                           | Conceptual analysis          | Medication                     |
| Torley 2005 <sup>(65)</sup>       | 36  | General                       | •  |   | •  |   | Qualitative       | Focus groups                                        | Thematic analysis            | Risk assessment                |
| Weiner 2009 <sup>(66)</sup>       | 86  | Older people                  | NS |   | •  |   | Qualitative       | Questionnaire                                       | Thematic analysis            | Risk assessment and management |
| <b>Scotland</b>                   |     |                               |    |   |    |   |                   |                                                     |                              |                                |
| Fairhurst 1998 <sup>(24)</sup>    | 24  | General                       | •  | • | NS |   | Qualitative       | Semi-structured interview                           | NS                           | Medication                     |
| <b>Sweden</b>                     |     |                               |    |   |    |   |                   |                                                     |                              |                                |
| Fharm 2009 <sup>(34)</sup>        | 14  | Type 2 diabetes               | NS |   | NS |   | Qualitative       | Focus group                                         | qualitative content analysis | Lifestyle changes/medication   |
| Silwer 2010 <sup>(20)</sup>       | 21  | General                       | •  |   | •  |   | Qualitative       | Semi-structured interview                           | Thematic analysis            | Medication                     |
| Wahlstrom 1997 <sup>(67)</sup>    | 20  | General                       | •  | • | NS |   | Phenomenologic al | Semi-structured Interview                           | Conceptual analysis          | Medication                     |
| <b>United Kingdom</b>             |     |                               |    |   |    |   |                   |                                                     |                              |                                |
| Fisseni 2008 <sup>(68)</sup>      | 6   | General                       | NS |   | •  |   | Qualitative       | Semi-structured interview                           | qualitative content analysis | Risk assessment                |
| Gale 2011 <sup>(22)</sup>         | 13  | General                       | •  |   | •  | • | Qualitative       | Semi-structured Interview                           | Thematic analysis            | Medication                     |
| Greenfield 2005 <sup>(19)</sup>   | 192 | General                       | NS |   | NS |   | Qualitative       | Closed question postal questionnaire with free text | Thematic analysis            | Medication                     |

|    |                                      |    |                                           |    |    |    |   |             |                                               |                        |                                   |
|----|--------------------------------------|----|-------------------------------------------|----|----|----|---|-------------|-----------------------------------------------|------------------------|-----------------------------------|
| 1  |                                      |    |                                           |    |    |    |   |             |                                               |                        |                                   |
| 2  |                                      |    |                                           |    |    |    |   |             |                                               |                        |                                   |
| 3  |                                      |    |                                           |    |    |    |   |             | comments                                      |                        |                                   |
| 4  | Kedward<br>2003 <sup>(32)</sup>      | 26 | General                                   | •  | •  | NS |   | Qualitative | Semi-structured<br>interview                  | Thematic<br>analysis   | Medication                        |
| 5  |                                      |    |                                           |    |    |    |   |             |                                               |                        |                                   |
| 6  | Lewis<br>2003 <sup>(69)</sup>        | 4  | General                                   | NS |    | •  |   | Qualitative | Semi-structured<br>interview                  | Thematic<br>analysis   | Medication                        |
| 7  |                                      |    |                                           |    |    |    |   |             |                                               |                        |                                   |
| 8  | Liew<br>2013 <sup>(70)</sup>         | 20 | General                                   | •  |    | •  | • | Qualitative | Face-to-face<br>semi-structured<br>interviews | Thematic<br>analysis   | Risk assessment                   |
| 9  |                                      |    |                                           |    |    |    |   |             |                                               |                        |                                   |
| 10 |                                      |    |                                           |    |    |    |   |             |                                               |                        |                                   |
| 11 | Macintosh<br>2003 <sup>(71)</sup>    | 18 | Primary<br>coronary<br>heart<br>disease   |    | •  | NS |   | Qualitative | Semi-structured<br>interviews                 | Conceptual<br>analysis | Nurse-led clinics                 |
| 12 |                                      |    |                                           |    |    |    |   |             |                                               |                        |                                   |
| 13 |                                      |    |                                           |    |    |    |   |             |                                               |                        |                                   |
| 14 |                                      |    |                                           |    |    |    |   |             |                                               |                        |                                   |
| 15 | Summerskil<br>I 2002 <sup>(72)</sup> | 14 | Secondary<br>coronary<br>heart<br>disease |    | NS | NS |   | Qualitative | Semi-structured<br>interviews                 | Thematic<br>analysis   | Barriers and<br>facilitators      |
| 16 |                                      |    |                                           |    |    |    |   |             |                                               |                        |                                   |
| 17 |                                      |    |                                           |    |    |    |   |             |                                               |                        |                                   |
| 18 |                                      |    |                                           |    |    |    |   |             |                                               |                        |                                   |
| 19 | Virdee<br>2013 <sup>(73)</sup>       | 11 | General                                   | •  | •  | NS |   | Qualitative | Semi structured<br>interview                  | Thematic<br>analysis   | Medication                        |
| 20 |                                      |    |                                           |    |    |    |   |             |                                               |                        |                                   |
| 21 | Williams<br>1994 <sup>(29)</sup>     | 40 | General                                   | •  | •  | NS |   | Qualitative | In depth<br>interview                         | Thematic<br>analysis   | Lifestyle change/<br>Medication   |
| 22 |                                      |    |                                           |    |    |    |   |             |                                               |                        |                                   |
| 23 | Wright<br>2006 <sup>(74)</sup>       | 10 | Severe<br>mental<br>illness               | •  |    | NS |   | Qualitative | In-depth<br>interviews                        | Thematic<br>analysis   | Lifestyle change/<br>Medication   |
| 24 |                                      |    |                                           |    |    |    |   |             |                                               |                        |                                   |
| 25 |                                      |    |                                           |    |    |    |   |             |                                               |                        |                                   |
| 26 | <b>United States of America</b>      |    |                                           |    |    |    |   |             |                                               |                        |                                   |
| 27 |                                      |    |                                           |    |    |    |   |             |                                               |                        |                                   |
| 28 | Bartels<br>2016 <sup>(21)</sup>      | 9  | Rheumatoid<br>arthritis                   | NS |    | NS |   | Qualitative | Semi-structured<br>interview                  | Grounded<br>theory     | Risk assessment<br>and management |
| 29 |                                      |    |                                           |    |    |    |   |             |                                               |                        |                                   |
| 30 | Rosal<br>2004 <sup>(75)</sup>        | 11 | High risk<br>coronary<br>heart<br>disease | NS |    | •  |   | Qualitative | Focus groups                                  | Thematic<br>analysis   | Lifestyle change/<br>Medication   |
| 31 |                                      |    |                                           |    |    |    |   |             |                                               |                        |                                   |
| 32 |                                      |    |                                           |    |    |    |   |             |                                               |                        |                                   |
| 33 |                                      |    |                                           |    |    |    |   |             |                                               |                        |                                   |
| 34 | Tanner<br>2017 <sup>(76)</sup>       | 23 | Secondary<br>coronary<br>heart<br>disease |    | •  | NS |   | Qualitative | Group interviews                              | Thematic<br>analysis   | Medication                        |
| 35 |                                      |    |                                           |    |    |    |   |             |                                               |                        |                                   |
| 36 |                                      |    |                                           |    |    |    |   |             |                                               |                        |                                   |
| 37 |                                      |    |                                           |    |    |    |   |             |                                               |                        |                                   |

38 \*n= general practitioners (including primary care physicians); •, type of prevention and risk specified in the study; CVD, cardiovascular disease; CV, cardiovascular; NS, not  
39 stated; UK, United Kingdom; US, United State

40

41

42

43

44

45

46

47

TABLE 2. Completeness of reporting in the included studies

| Item                                                                                   | Studies reporting each item                              | Number of studies (%) |
|----------------------------------------------------------------------------------------|----------------------------------------------------------|-----------------------|
| <b>Personal Characteristics</b>                                                        |                                                          |                       |
| Interviewer / facilitator identified                                                   | (19, 20, 23-25, 27, 30, 32-34, 59, 61, 64, 72, 73)       | 15 (44)               |
| Experience or training in qualitative research                                         | (27, 32, 33, 59, 75)                                     | 5 (15)                |
| <b>Relationship with participants</b>                                                  |                                                          |                       |
| Relationship established prior to study commencement                                   | (26, 32, 59, 61, 68-70, 76)                              | 8 (24)                |
| <b>Participant Selection</b>                                                           |                                                          |                       |
| Selection strategy ( <i>e.g. snowball, purposive, convenience, comprehensive</i> )     | (19-26, 27-34, 59-76)                                    | 34 (100)              |
| Method of approach or recruitment                                                      | (19-23, 25-27, 28, 30-34, 59-70, 72-76)                  | 31 (91)               |
| Sample size                                                                            | (19-26, 27-34, 59-76)                                    | 34 (100)              |
| Number and/or reasons for non-participation                                            | (20, 21, 24, 25, 26, 27-30, 32-34, 59, 63-67, 69, 72-74) | 22 (65)               |
| <b>Setting</b>                                                                         |                                                          |                       |
| Venue of data collection                                                               | (19, 26, 59, 61, 62, 68-71, 76)                          | 10 (29)               |
| Presence of non-participants ( <i>e.g. clinical staff</i> )                            | (26, 31, 34, 68, 76)                                     | 5 (15)                |
| Description of the sample                                                              | (19-26, 27-34, 59-70, 73-76)                             | 32 (94)               |
| <b>Data Collection</b>                                                                 |                                                          |                       |
| Questions, prompts or topic guide                                                      | (19-26, 27-34, 59-70, 72-76)                             | 33 (97)               |
| Repeat interviews / observations                                                       | (22, 23, 31, 34, 67, 74)                                 | 6 (18)                |
| Audio / visual recording                                                               | (20, 21, 23-26, 27-34, 59-62, 64, 65, 67-73, 75-77)      | 30 (88)               |
| Field notes                                                                            | (26, 28, 34, 62, 64, 65, 73)                             | 7 (21)                |
| Duration of data collection (interview or focus group)                                 | (20, 21, 25, 26, 28, 31, 34, 59, 60, 66-76)              | 20 (59)               |
| Protocol for data preparation and transcription                                        | (19-28, 30-34, 59-64, 66-71, 73-76)                      | 31 (91)               |
| Data (or theoretical) saturation                                                       | (21, 22, 25, 27, 32-34, 59, 60, 70, 73, 74)              | 12 (36)               |
| <b>Data Analysis</b>                                                                   |                                                          |                       |
| Researcher/expert triangulation (multiple researchers involved in coding and analysis) | (19-21, 23-26, 27-34, 59-61, 65, 67-74, 76)              | 28 (82)               |
| Derivation of themes or findings ( <i>e.g. inductive, constant comparison</i> )        | (19-26, 27-34, 59-62, 65-76)                             | 32 (94)               |
| Use of software ( <i>e.g. NVivo, HyperRESEARCH, Atlas.ti</i> )                         | (20, 21, 23, 26, 28-30, 59-62, 64, 67, 70-72, 74)        | 17 (50)               |
| Participant feedback on findings                                                       | (21, 23, 31, 32, 67, 73)                                 | 6 (18)                |

1  
2  
3  
4  
5  
6  
7  
8  
9  
10  
11  
12  
13  
14  
15  
16  
17  
18  
19  
20  
21  
22  
23  
24  
25  
26  
27  
28  
29  
30  
31  
32  
33  
34  
35  
36  
37  
38  
39  
40  
41  
42  
43  
44  
45  
46  
47  
48  
49  
50  
51  
52  
53  
54  
55  
56  
57  
58  
59  
60

| <b>Reporting</b>                                                                               |                                            |         |
|------------------------------------------------------------------------------------------------|--------------------------------------------|---------|
| Participant quotations or raw data provided ( <i>picture, diary entries</i> )                  | (19-22, 24-26, 27-34, 59-61, 64-69, 71-76) | 30 (88) |
| Range and depth of insight into participant perspectives ( <i>thick description provided</i> ) | (19-26, 27-34, 59-62, 67-69, 72-75)        | 27 (79) |

For peer review only

TABLE 3. Selected quotations from primary studies to illustrate each theme

| Theme                                      | Quotations                                                                                                                                                                                                                                                                                                                                                                                                                                                                                                                                                                                                                                                                                      | Contributing Studies                 |
|--------------------------------------------|-------------------------------------------------------------------------------------------------------------------------------------------------------------------------------------------------------------------------------------------------------------------------------------------------------------------------------------------------------------------------------------------------------------------------------------------------------------------------------------------------------------------------------------------------------------------------------------------------------------------------------------------------------------------------------------------------|--------------------------------------|
| <b>Defining own primary role</b>           |                                                                                                                                                                                                                                                                                                                                                                                                                                                                                                                                                                                                                                                                                                 |                                      |
| Duty to prescribe medication               | <p>"...but it's not prevention if you think that it's just diet and physical exercise... if we don't provide medical treatment for them..."(34)</p> <p>"Some GPs regarded themselves as responsible for the care and treatment of the patient and would intervene when necessary. They would act as active coaches and prescribe adequate medical treatment when needed to prevent cardiovascular complications."(34)</p> <p>"Non-pharmaceutical treatment is not effective and it is important, in primary prevention, to avoid negative impacts on quality of life through changes in lifestyle, since we are mostly dealing with people who feel healthy before they get treatment."(20)</p> | (19, 20, 32, 34)                     |
| Refraining from risking patients' lives    | <p>"he would always recommend preventative medication to their patients, saying ' I don' t take the slightest risk with someone else' s life'"(22)</p> <p>"Professional vigilance: Provider's attention and alertness to seek and review information or knowledge about a patient's risk"(21)</p> <p>"it is worth treating anyone at risk of cardiovascular disease (with the patient's co-operation and full knowledge of the facts), however small the risk"(19)</p> <p>"the drug would 'reduce the chance of further coronary events'"(64)</p>                                                                                                                                               | (19, 21, 22, 64)                     |
| Mediating between patients and specialists | <p>"I am really trying to, as a primary care doctor, work on. . .the importance of preventing cardiovascular disease. . . and the increased risk with these inflammatory conditions. . .So I think that's a good co-manage thing, where the rheumatologist can stress that, and then I can keep going with it"(21)</p> <p>"Providers who felt comfortable contacting one another through familiarity or "shared" patients (conditions) were sometimes described as "co-managing," working together on CVD prevention"(21)</p>                                                                                                                                                                   | (21)                                 |
| Delegating responsibility to patients      | <p>"Our job is to advocate for nutrition change. Tell them about the risk if they continue eating the same way. Provide the literature and keep doing the tests. That is all we can do until the patient wants to take action. You could call us the influencers."(23)</p> <p>"I control the information, the prescribing decision is shared, but whether or not they then purchase and take the medicines, I don't control that..."(20)</p> <p>"I don't consider myself having the right to demand that people stop smoking. I think it is presumptuous to make such strong demands."(20)</p>                                                                                                  | (20, 23, 28, 29, 34)                 |
| Providing holistic care                    | <p>"Few interviewed doctors reported that the provision of nutrition education was part of their medical role. These doctors used words such as 'holistic' and statements such as 'we are carers for the total patient' to describe this role."(23)</p> <p>"Here, the doctor's persuasive attitude towards the patient, creating a positive expectation, was considered important."(20)</p> <p>"The doctor has the main responsibility, because he or she has the adequate skills and enjoys the patient's confidence to make the decisions, and because the patients sometimes make themselves dependent and are unwilling to decide."(20)</p>                                                 | (20, 23, 26, 29, 66)                 |
| <b>Trusting external expertise</b>         |                                                                                                                                                                                                                                                                                                                                                                                                                                                                                                                                                                                                                                                                                                 |                                      |
| Depending on credible evidence and opinion | <p>"I'm comfortable to be guided by the experts rather than try and invent too much on what might be dodgy assumptions on my part."(25)</p> <p>"Firm trust in the scientific documentation of effectiveness for the individual and of cut-off points as true levels of increased predictable risk."(20)</p> <p>"Some doubts about the effectiveness for the individual, but acceptance of the guidelines as rules to obey (even if they change over time), hoping and wishing that one is doing the best for the patient."(20)</p> <p>"I think the strength of the absolute risk concept is that it improves the targeting of certain interventions, so that you have a greater</p>             | (20, 24, 25, 29, 34, 60, 61, 64, 72) |

1  
2  
3  
4  
5  
6  
7  
8  
9  
10  
11  
12  
13  
14  
15  
16  
17  
18  
19  
20  
21  
22  
23  
24  
25  
26  
27  
28  
29  
30  
31  
32  
33  
34  
35  
36  
37  
38  
39  
40  
41  
42  
43  
44  
45  
46  
47

|                                                  |                                                                                                                                                                                                                                                                                                                                                                                                                                                                                                                                                                                                                                                                                                                                                                    |                                                 |
|--------------------------------------------------|--------------------------------------------------------------------------------------------------------------------------------------------------------------------------------------------------------------------------------------------------------------------------------------------------------------------------------------------------------------------------------------------------------------------------------------------------------------------------------------------------------------------------------------------------------------------------------------------------------------------------------------------------------------------------------------------------------------------------------------------------------------------|-------------------------------------------------|
|                                                  | accuracy when you're prescribing things like Statins but also a greater accuracy and confidence when you prescribe just behavioral measures like diet and exercise..."(60)                                                                                                                                                                                                                                                                                                                                                                                                                                                                                                                                                                                         |                                                 |
| Entrusting care to other health professionals    | <p>"...doctors reported that the provision of nutrition care was outside their interest and expertise. These GPs described themselves as 'generalists' and viewed 'nutrition education as a specialty service'."(23)</p> <p>"[T]rained support staff to help us deal with these issues, who can sit down and speak with people about modification of lifestyle or risk factors. And who could then have follow-up for them also."(75)</p> <p>"If I got a letter from [a cardiologist] saying that 'we really find drug Y is superior in this situation' then that would influence me to use it."(72)</p> <p>"I can only do so much for this patient because I have 15 minutes ... so that team-based model... I think the program got that team approach."(26)</p> | (23, 26, 34, 61, 72, 74, 75)                    |
| Integrating into patient context                 | <p>"[AR assessment] doesn't take into account your family history, your weight, if you're active or not . . . when you've been in this game for as many years as I have you like to get a big picture."(25)</p> <p>"... you have to rely on your clinical gut feeling about that patient. Taking all the information that you have gathered to date, put it all together and compute it in your mind and then decide how hard you are going to chase each of these risk factors..."(65)</p> <p>"The role [of] multivitamins is very important, as diet [is] often inadequate, and [it is] very difficult to get this age group to change. In saying that I sent a very motivated 83 year old to [a] dietitian."(66)</p>                                            | (19-21, 25, 33, 34, 64-66, 70, 72, 73)          |
| <b>Motivating behavior change for prevention</b> |                                                                                                                                                                                                                                                                                                                                                                                                                                                                                                                                                                                                                                                                                                                                                                    |                                                 |
| Highlighting tangible improvements               | <p>"I'm trying to convince them that they're eating too much and not exercising enough and they're trying to convince me that they are...but the ones that take it on board and make progress...they feel positive... encouraged... rewarded...motivated to keep going."(27)</p> <p>"You want somehow to give them something positive to cling to... that if I can do this and that and I can stop smoking or I can go down in weight or if I can be a little more physically active, I will have lots to gain"(20)</p> <p>'... ive got one program where you can show the patient how the risk changes as you run the blood pressure down, or change the cholesterol. It's quite a powerful tool..."(65)</p>                                                      | (20, 27, 65)                                    |
| Negotiating patient acceptance                   | <p>"This is a partnership not a dictatorship so it has to be something that's on your agenda as well as mine."(27)</p> <p>"Three GPs had a 'negotiator' tendency, but the negotiations were mostly focused on lifestyle too: 'We insisted again on diet and exercise"(61)</p> <p>"Clearly the evidence around the world is that the primary care practitioner/patient relationship is the magic ingredient in the health system. There's continuity and there's trust. You get better outcomes and part of that is that people are more willing to commit to treatment plans. I think the General Practitioner's role is key in promoting adherence"(59)</p>                                                                                                       | (19, 20, 27, 28, 30, 31, 59-61, 65, 66, 68, 75) |
| Enabling autonomy and empowerment                | <p>"Reassuring people a bit and helping them to understand that they can control their risk factors either with or without medication and then I think that gives them a sense of empowerment, a bit of control."(27)</p> <p>"You've just got to allow people to make an informed decision and leave it up to them"(69)</p>                                                                                                                                                                                                                                                                                                                                                                                                                                        | (27, 69)                                        |
| Harnessing the power of fear                     | <p>"I am a hard master, I'm a very scary person...and I won't let you get away with things. But it's only because I care and because I want good things for you."(27)</p> <p>"I like to...put a little fear into them...if they don't 'pull up your socks' (sic) bad things can happen to them...if you don't want that kind of scenario you do what I tell you."(27)</p> <p>"...absolute risk charts and calculators were used by some GPs to 'scare ' patients into taking action to reduce their risk of CVD, either through lifestyle change or medication."(27)</p>                                                                                                                                                                                           | (27, 31, 34, 76)                                |
| Disappointment with                              | "But then there are probably an equal number of patients from whom we give this advice and they never want to hear it in the first place,                                                                                                                                                                                                                                                                                                                                                                                                                                                                                                                                                                                                                          | (29)                                            |



|                                        |                                                     |                                                                                                                                                                                                                                                                                                                                                                                                                                                                                                                                                                                                                                                                                                                                                                        |                                      |
|----------------------------------------|-----------------------------------------------------|------------------------------------------------------------------------------------------------------------------------------------------------------------------------------------------------------------------------------------------------------------------------------------------------------------------------------------------------------------------------------------------------------------------------------------------------------------------------------------------------------------------------------------------------------------------------------------------------------------------------------------------------------------------------------------------------------------------------------------------------------------------------|--------------------------------------|
| 1<br>2<br>3<br>4<br>5<br>6             | futility of advice                                  | and having heard it they have no intention of doing anything about it . . . I am not convinced that we do as much good as we like to think we do. I am fairly depressed that what we do is probably a complete waste of time . . . are we really preventing disease by what we do?"(29)                                                                                                                                                                                                                                                                                                                                                                                                                                                                                |                                      |
| 7                                      | <b>Recognizing and accepting patient capacities</b> |                                                                                                                                                                                                                                                                                                                                                                                                                                                                                                                                                                                                                                                                                                                                                                        |                                      |
| 8<br>9<br>10<br>11<br>12<br>13         | Ascertaining patient's drive for lifestyle change   | "They all want a pill (laughter) for everything and that's the main challenge we find . . . not many patients are willing to change their lifestyle unfortunately . . . they want the easy way out. A pill for everything."(33)<br>"I try to have a discussion with people to find out how much they want to use lifestyle modification and I think in situations it is very important to have the patient try the lifestyle to see if it will work and then treat them, to give them the option... I try to determine their preferences"(22)<br>"Trying to work out what barriers there are, so it means digging in a bit deeper into what makes this happen, what do you normally do, finding out more about their life and why they, what they can feasibly do"(30) | (19, 22, 23, 30, 33, 60, 61)         |
| 14<br>15<br>16<br>17                   | Conceding to ingrained habits                       | "Because most patients you see in real life are elderly, and there you only find high levels, and you realize that you can give this advice about their lifestyle, but they will not be very effective on this person so you'd better prescribe pharmaceuticals"(20)<br>"I think that in some circumstances you can be outstandingly effective, because I have had some patients who have done very well as a result of it. But I think in general terms it is very difficult to change people's established patterns of behavior"(29)                                                                                                                                                                                                                                 | (20, 29, 30, 60)                     |
| 18<br>19<br>20<br>21<br>22<br>23       | Prioritizing urgent comorbidities                   | "Other patients had more important problems than CVD risk, either acute conditions that dominated one-off consultations or competing chronic issues such as mental health. In these situations, absolute risk was often not assessed until the patient was ready to discuss CVD risk"(27)<br>"Diabetic patients or hypertensive patients may already be on several medications already...and then if you are inflicting another tablet, then it's difficult and you are given the realms of polypharmacy. It can be very difficult and I am sure the compliance must drop considerably for such patients."(32)                                                                                                                                                         | (21, 23, 27, 31, 32, 59, 63, 72, 75) |
| 24<br>25<br>26<br>27<br>28<br>29<br>30 | Tailoring to patient environment and literacy       | " I think people with a higher education level are much more interested in perhaps in absolute figures and like to see the chart or the risk calculator and see how things can change. Whereas if you've got... someone who is less educated then you need to be a little bit more... simplistic in your description of risk and changing risk."(27)<br>"The environment many of our patients live in is not conducive to making lifestyle behavioral changes...multiple fast food outlets, pavements may not be safe, lack of cycle ways etc."(31)<br>"...prevention of CVD should be based on the reduction of RF through educational programmes that promote balanced diets, exercise and smoking cessation."(62)                                                   | (19, 27, 29, 31, 62)                 |
| 31                                     | <b>Avoiding over-medicalization</b>                 |                                                                                                                                                                                                                                                                                                                                                                                                                                                                                                                                                                                                                                                                                                                                                                        |                                      |
| 32<br>33<br>34<br>35<br>36             | Averting long-term dependence on medications        | "Only that I think one of the most important things is this smoking cessation. I guess again because of the people I see, being young, that is what I hammer."(19)<br>"...but there is a pharmaceutical industry that puts pressure on us, it's in newspapers etc, we are continually fed with this... and I think it is as much my duty to sit here and tone down the risks for the young ones, above all. It doesn't seem reasonable that the majority of the population should take medicines"(20)<br>"Above all to give up smoking. That is the most important, as I see it..."(67)                                                                                                                                                                                | (19, 20, 32, 34, 67, 73, 75)         |
| 37<br>38<br>39<br>40                   | Preventing a false sense of security                | "You cannot do one thing without the other . . . no use starting those tablets if you go overboard with the diet, I mean people say 'oh it doesn't matter, take the tablets I can do anything I like'. That's not true . . . you have to have a good diet as well as taking the tablets. The tablets alone is not going to fix everything."(33)<br>"It also can encourage people to believe that they are immortal almost and that the drug is going to protect them and that is not actually                                                                                                                                                                                                                                                                          | (20, 32, 33, 73, 75, 76)             |



1  
2  
3  
4  
5  
6  
7  
8  
9  
10  
11  
12  
13  
14  
15  
16  
17  
18  
19  
20  
21  
22  
23  
24  
25  
26  
27  
28  
29  
30  
31  
32  
33  
34  
35  
36  
37  
38  
39  
40  
41  
42  
43  
44  
45  
46  
47

|                                        |                                                                                                                                                                                                                                                                                                                                                                                                                                                                                                                                                                                                                                                                                                                                                                                                                                                                                                                                     |                                  |
|----------------------------------------|-------------------------------------------------------------------------------------------------------------------------------------------------------------------------------------------------------------------------------------------------------------------------------------------------------------------------------------------------------------------------------------------------------------------------------------------------------------------------------------------------------------------------------------------------------------------------------------------------------------------------------------------------------------------------------------------------------------------------------------------------------------------------------------------------------------------------------------------------------------------------------------------------------------------------------------|----------------------------------|
|                                        | what it does, and it may actually encourage people to take less responsibility for their own illness which again is not good.”(32)                                                                                                                                                                                                                                                                                                                                                                                                                                                                                                                                                                                                                                                                                                                                                                                                  |                                  |
| Minimizing stress of sickness          | <p>“If the patient was highly anxious about their health, they may interpret even a low risk as something to be concerned about.”(27)</p> <p>“Then of course there are patient factors ... medicalization of society, the philosophical thing really in that you are perfectly well until you go to the doctor and come out with high cholesterol. It’s a bit like treating asymptomatic hypertension.”(32)</p> <p>“We are putting fear into people in order to achieve objectives which we are being paid for. And we have created, as a profession, a very frightened population ... So I am skeptical”(29)</p>                                                                                                                                                                                                                                                                                                                   | (20, 24, 25, 29, 32, 34, 61, 67) |
| <b>Minimizing economic burdens</b>     |                                                                                                                                                                                                                                                                                                                                                                                                                                                                                                                                                                                                                                                                                                                                                                                                                                                                                                                                     |                                  |
| Avoiding unjustified costs to patients | <p>“From every point of view, from patient care, cost . . . if you can make the changes which have the least amount of cost to everyone then I think that’s usually lifestyle. So that’s usually the way that I start with and then use medication if we’re not getting there.”(33)</p> <p>“The down side for the practice is that it is expensive and it’s a lot of patients who will be on it for life. Once you start someone on it, it is for life, so it is expensive in terms of cost of drugs...”(32)</p> <p>“... it must be the medicines that did it, mustn't it, it saved lots of money, I think, it's costly intensive care, MI and stroke and those things”(20)</p>                                                                                                                                                                                                                                                     | (20, 22, 32, 33, 59, 67, 69)     |
| Delivering practice within budget      | <p>“I would only prescribe it if it doesn't count on my medication budget!”(68)</p> <p>“I think there is massive external pressures on us for every single thing we prescribe and I think the statins thing is rather bizarre in that we were heavily penalized for overspending on our drug budgets when we were spending heavily on statins, and we still have that pressure on drug budgets with negative budgets and target payments and all the rest of it”(32)</p> <p>“I think in terms of cost–benefit, it is an appropriate approach because people with an existing disease you are going to save lives and quality of life for less money spent in preventing. Primary prevention is going to be less cost-effective because the number of people you need to prescribe to prevent one event, so in that respect yes it is right, but whether it is right from an ethical point of view is difficult to answer.” (32)</p> | (19, 24, 31, 32, 62, 68)         |
| Alleviating healthcare expenses        | <p>“at the moment we don't have the resources to actually give the rehabilitation that we could do if we had the extra nurse time... we have the protocols, we have the expertise, but we don't have the nurse hours to take that on”(71)</p> <p>“Some practitioners felt that primary care was under increasing pressure as a result of a general increase in demand and a shift of services from secondary to primary care. Pre-hospital thrombolysis was seen as a further increase in workload and possibly outside the current NHS contract.”</p>                                                                                                                                                                                                                                                                                                                                                                              | (29, 32, 71, 74)                 |

- 1 **List of supplementary files**
- 2
- 3
- 4
- 5 **3 Supplementary File 1. PRISMA checklist**
- 6
- 7 **4 Supplementary File 2. Search strategy**
- 8
- 9
- 10
- 11
- 12
- 13
- 14
- 15
- 16
- 17
- 18
- 19
- 20
- 21
- 22
- 23
- 24
- 25
- 26
- 27
- 28
- 29
- 30
- 31
- 32
- 33
- 34
- 35
- 36
- 37
- 38
- 39
- 40
- 41
- 42
- 43
- 44
- 45
- 46
- 47
- 48
- 49
- 50
- 51
- 52
- 53
- 54
- 55
- 56
- 57
- 58
- 59
- 60

For peer review only

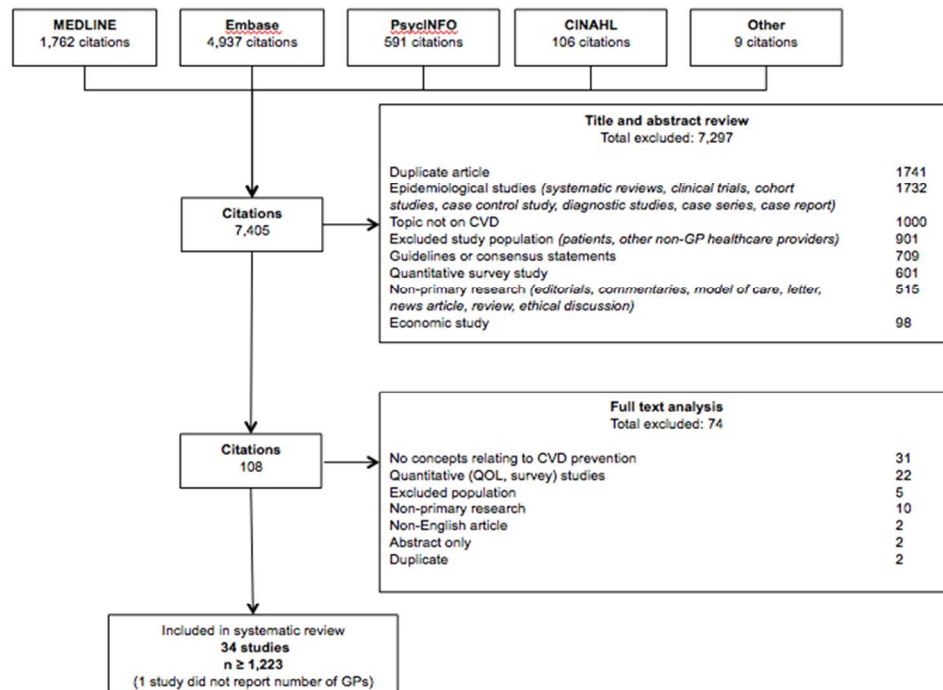

FIGURE 1

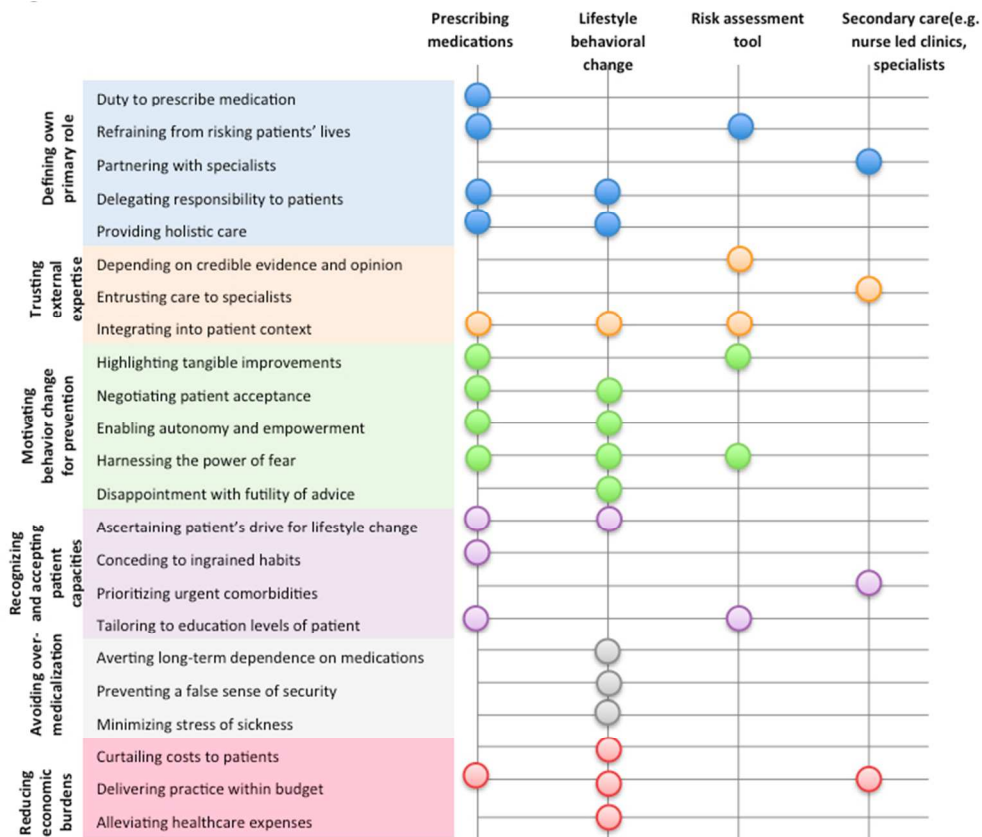

FIGURE 2

www.bmj.com

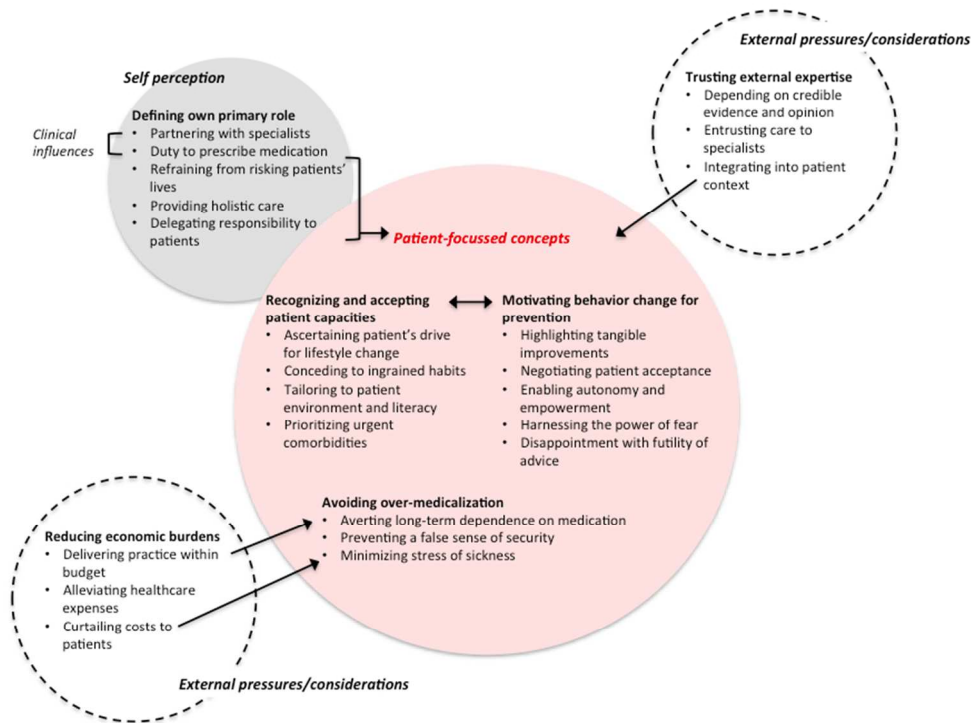

FIGURE 3

1  
2  
3 **Supplementary File 1. PRISMA checklist**  
4  
5

| Section/topic                      | #  | Checklist item                                                                                                                                                                                                                                                                                              | Reported on page # |
|------------------------------------|----|-------------------------------------------------------------------------------------------------------------------------------------------------------------------------------------------------------------------------------------------------------------------------------------------------------------|--------------------|
| <b>TITLE</b>                       |    |                                                                                                                                                                                                                                                                                                             |                    |
| Title                              | 1  | Identify the report as a systematic review, meta-analysis, or both.                                                                                                                                                                                                                                         | 1                  |
| <b>ABSTRACT</b>                    |    |                                                                                                                                                                                                                                                                                                             |                    |
| Structured summary                 | 2  | Provide a structured summary including, as applicable: background; objectives; data sources; study eligibility criteria, participants, and interventions; study appraisal and synthesis methods; results; limitations; conclusions and implications of key findings; systematic review registration number. | 2-3                |
| <b>INTRODUCTION</b>                |    |                                                                                                                                                                                                                                                                                                             |                    |
| Rationale                          | 3  | Describe the rationale for the review in the context of what is already known.                                                                                                                                                                                                                              | 4                  |
| Objectives                         | 4  | Provide an explicit statement of questions being addressed with reference to participants, interventions, comparisons, outcomes, and study design (PICOS).                                                                                                                                                  | N/A                |
| <b>METHODS</b>                     |    |                                                                                                                                                                                                                                                                                                             |                    |
| Protocol and registration          | 5  | Indicate if a review protocol exists, if and where it can be accessed (e.g., Web address), and, if available, provide registration information including registration number.                                                                                                                               | N/A                |
| Eligibility criteria               | 6  | Specify study characteristics (e.g., PICOS, length of follow-up) and report characteristics (e.g., years considered, language, publication status) used as criteria for eligibility, giving rationale.                                                                                                      | 5                  |
| Information sources                | 7  | Describe all information sources (e.g., databases with dates of coverage, contact with study authors to identify additional studies) in the search and date last searched.                                                                                                                                  | 5                  |
| Search                             | 8  | Present full electronic search strategy for at least one database, including any limits used, such that it could be repeated.                                                                                                                                                                               | 40-42              |
| Study selection                    | 9  | State the process for selecting studies (i.e., screening, eligibility, included in systematic review, and, if applicable, included in the meta-analysis).                                                                                                                                                   | 5                  |
| Data collection process            | 10 | Describe method of data extraction from reports (e.g., piloted forms, independently, in duplicate) and any processes for obtaining and confirming data from investigators.                                                                                                                                  | 5                  |
| Data items                         | 11 | List and define all variables for which data were sought (e.g., PICOS, funding sources) and any assumptions and simplifications made.                                                                                                                                                                       | N/A                |
| Risk of bias in individual studies | 12 | Describe methods used for assessing risk of bias of individual studies (including specification of whether this was done at the study or outcome level), and how this information is to be used in any data synthesis.                                                                                      | N/A                |
| Summary measures                   | 13 | State the principal summary measures (e.g., risk ratio, difference in means).                                                                                                                                                                                                                               | N/A                |
| Synthesis of results               | 14 | Describe the methods of handling data and combining results of studies, if done, including measures of consistency (e.g., $I^2$ ) for each meta-analysis.                                                                                                                                                   | 6                  |

46  
47

1  
2  
3  
4  
5  
6  
7  
8  
9  
10  
11  
12  
13  
14  
15  
16  
17  
18  
19  
20  
21  
22  
23  
24  
25  
26  
27  
28  
29  
30  
31  
32  
33  
34  
35  
36  
37  
38  
39  
40  
41  
42  
43  
44  
45  
46  
47

| Section/topic                 | #  | Checklist item                                                                                                                                                                                           | Reported on page # |
|-------------------------------|----|----------------------------------------------------------------------------------------------------------------------------------------------------------------------------------------------------------|--------------------|
| Risk of bias across studies   | 15 | Specify any assessment of risk of bias that may affect the cumulative evidence (e.g., publication bias, selective reporting within studies).                                                             | N/A                |
| Additional analyses           | 16 | Describe methods of additional analyses (e.g., sensitivity or subgroup analyses, meta-regression), if done, indicating which were pre-specified.                                                         | N/A                |
| <b>RESULTS</b>                |    |                                                                                                                                                                                                          |                    |
| Study selection               | 17 | Give numbers of studies screened, assessed for eligibility, and included in the review, with reasons for exclusions at each stage, ideally with a flow diagram.                                          | 6                  |
| Study characteristics         | 18 | For each study, present characteristics for which data were extracted (e.g., study size, PICOS, follow-up period) and provide the citations.                                                             | 27-29              |
| Risk of bias within studies   | 19 | Present data on risk of bias of each study and, if available, any outcome level assessment (see item 12).                                                                                                | N/A                |
| Results of individual studies | 20 | For all outcomes considered (benefits or harms), present, for each study: (a) simple summary data for each intervention group (b) effect estimates and confidence intervals, ideally with a forest plot. | N/A                |
| Synthesis of results          | 21 | Present results of each meta-analysis done, including confidence intervals and measures of consistency.                                                                                                  | N/A                |
| Risk of bias across studies   | 22 | Present results of any assessment of risk of bias across studies (see Item 15).                                                                                                                          | N/A                |
| Additional analysis           | 23 | Give results of additional analyses, if done (e.g., sensitivity or subgroup analyses, meta-regression [see Item 16]).                                                                                    | 38                 |
| <b>DISCUSSION</b>             |    |                                                                                                                                                                                                          |                    |
| Summary of evidence           | 24 | Summarize the main findings including the strength of evidence for each main outcome; consider their relevance to key groups (e.g., healthcare providers, users, and policy makers).                     | 15-17              |
| Limitations                   | 25 | Discuss limitations at study and outcome level (e.g., risk of bias), and at review-level (e.g., incomplete retrieval of identified research, reporting bias).                                            | 17                 |
| Conclusions                   | 26 | Provide a general interpretation of the results in the context of other evidence, and implications for future research.                                                                                  | 17                 |
| <b>FUNDING</b>                |    |                                                                                                                                                                                                          |                    |
| Funding                       | 27 | Describe sources of funding for the systematic review and other support (e.g., supply of data); role of funders for the systematic review.                                                               | 18                 |

From: Moher D, Liberati A, Tetzlaff J, Altman DG, The PRISMA Group (2009). Preferred Reporting Items for Systematic Reviews and Meta-Analyses: The PRISMA Statement. PLoS Med 6(7): e1000097. doi:10.1371/journal.pmed1000097

For more information, visit: [www.prisma-statement.org](http://www.prisma-statement.org).

**Supplementary File 2. Search strategies****MEDLINE 1946 to April 18 2018****Searches**

- 1 exp General Practitioners/
- 2 general practi\$.tw.
- 3 or/1-2
- 4 exp Cardiovascular Diseases/
- 5 cardiovascular\$.tw.
- 6 Coronary Disease/
- 7 Coronary Disease\$.tw.
- 8 heart\$.tw.
- 9 cardiac\$.tw.
- 10 or/4-9
- 11 prevent\$.tw.
- 12 exp Secondary Prevention/ or exp Primary Prevention/
- 13 risk\$.tw.
- 14 rehabi\$.tw.
- 15 or/11-14
- 16 3 and 10 and 15
- 17 exp qualitative research/
- 18 qualitative.tw.
- 19 interview\$.tw.
- 20 focus group\$.tw.
- 21 (thematic\$ or theme\$).tw.
- 22 grounded theory.tw.
- 23 phenomenol\$.tw.
- 24 ethnograph\$.tw.
- 25 describ\$.tw.
- 26 (perspect\$ or percept\$ or attitud\$ or belie\$ or value\$ or view\$ or prefer\$).tw.
- 27 exp decision making/
- 28 exp Patient Care/
- 29 barrier\$.tw.
- 30 exp "Attitude of Health Personnel"/
- 31 or/17-30
- 32 16 and 31



**EMBASE 1980 to April 18 2018****Searches**

- 1 exp general practitioner/
- 2 general practi\$.tw.
- 3 or/1-2
- 4 exp Cardiovascular Diseases/
- 5 cardiovascular\$.tw.
- 6 exp coronary artery disease/
- 7 coronary disease\$.tw.
- 8 heart\$.tw.
- 9 cardiac\$.tw.
- 10 or/4-9
- 11 prevent\$.tw.
- 12 exp primary prevention/ or exp prevention study/ or exp secondary prevention/ or exp prevention/
- 13 risk\$.tw.
- 14 rehabi\$.tw.
- 15 or/11-14
- 16 3 and 10 and 15
- 17 exp qualitative research/
- 18 qualitative.tw.
- 19 interview\$.tw.
- 20 focus group\$.tw.
- 21 (thematic\$ or theme\$).tw.
- 22 grounded theory.tw.
- 23 phenomenol\$.tw.
- 24 ethnograph\$.tw.
- 25 describ\$.tw.
- 26 (perspect\$ or percept\$ or attitud\$ or belie\$ or value\$ or view\$ or prefer\$).tw.
- 27 exp decision making/
- 28 exp patient care/
- 29 barrier\$.tw.
- 30 exp health personnel attitude/
- 31 or/17-30
- 32 16 and 31

**PsycINFO 1806 to April 18 2018**

# ▲

**Searches**

- 1 exp General Practitioners/
- 2 general practi\$.tw.
- 3 or/1-2
- 4 exp Cardiovascular Disorders/
- 5 cardiovascular\$.tw.
- 6 exp Heart Disorders/ or exp Myocardial Infarctions/
- 7 coronary disease\$.tw.
- 8 heart\$.tw.
- 9 cardiac\$.tw.
- 10 or/5-9
- 11 3 and 10

**CINAHL**

- |    |                                                                                    |
|----|------------------------------------------------------------------------------------|
| S5 | S2 OR S3 OR S4                                                                     |
| S4 | (MH "Heart Diseases+")                                                             |
| S3 | (MM "Coronary Disease+") OR "Coronary Disease" OR (MM "Coronary Arteriosclerosis") |
| S2 | (MM "Cardiovascular Diseases+")                                                    |
| S1 | (MM "Physicians, Family")                                                          |

# BMJ Open

## General practitioners' perspectives on the prevention of cardiovascular disease: systematic review and thematic synthesis of qualitative studies

|                                 |                                                                                                                                                                                                                                                                                                                                                                                                                                                                                                                                                                                                                                                                                                                                                                                                                                                                                                                                                                                                                                                                                                                                                                                                                                                                                                                       |
|---------------------------------|-----------------------------------------------------------------------------------------------------------------------------------------------------------------------------------------------------------------------------------------------------------------------------------------------------------------------------------------------------------------------------------------------------------------------------------------------------------------------------------------------------------------------------------------------------------------------------------------------------------------------------------------------------------------------------------------------------------------------------------------------------------------------------------------------------------------------------------------------------------------------------------------------------------------------------------------------------------------------------------------------------------------------------------------------------------------------------------------------------------------------------------------------------------------------------------------------------------------------------------------------------------------------------------------------------------------------|
| Journal:                        | <i>BMJ Open</i>                                                                                                                                                                                                                                                                                                                                                                                                                                                                                                                                                                                                                                                                                                                                                                                                                                                                                                                                                                                                                                                                                                                                                                                                                                                                                                       |
| Manuscript ID                   | bmjopen-2017-021137.R2                                                                                                                                                                                                                                                                                                                                                                                                                                                                                                                                                                                                                                                                                                                                                                                                                                                                                                                                                                                                                                                                                                                                                                                                                                                                                                |
| Article Type:                   | Research                                                                                                                                                                                                                                                                                                                                                                                                                                                                                                                                                                                                                                                                                                                                                                                                                                                                                                                                                                                                                                                                                                                                                                                                                                                                                                              |
| Date Submitted by the Author:   | 27-Sep-2018                                                                                                                                                                                                                                                                                                                                                                                                                                                                                                                                                                                                                                                                                                                                                                                                                                                                                                                                                                                                                                                                                                                                                                                                                                                                                                           |
| Complete List of Authors:       | Ju, Irene; University of Sydney School of Public Health; Children's Hospital at Westmead Centre for Kidney Research<br>Banks, Emily; National Centre for Epidemiology and Population Health; Sax Institute<br>Calabria, Bianca; Australian National University Medical School, National Centre for Epidemiology and Population Health; University of New South Wales, National Drug and Alcohol Research Centre<br>Ju, Angela; University of Sydney School of Public Health; Children's Hospital at Westmead Centre for Kidney Research<br>Agostino, Jason; Australian National University, Academic Unit of General Practice<br>Korda, Rosemary; National Centre for Epidemiology and Population Health<br>Usherwood, Tim; University of Sydney, Department of General Practice<br>Manera, Karine; University of Sydney School of Public Health; Children's Hospital at Westmead Centre for Kidney Research<br>Hanson, Camilla; University of Sydney School of Public Health; Children's Hospital at Westmead Centre for Kidney Research<br>Craig, Jonathan; University of Sydney, Sydney School of Public Health; Children's Hospital at Westmead Centre for Kidney Research<br>Tong, Allison; The University of Sydney, Sydney School of Public Health; Children's Hospital at Westmead Centre for Kidney Research |
| <b>Primary Subject Heading</b>: | General practice / Family practice                                                                                                                                                                                                                                                                                                                                                                                                                                                                                                                                                                                                                                                                                                                                                                                                                                                                                                                                                                                                                                                                                                                                                                                                                                                                                    |
| Secondary Subject Heading:      | Cardiovascular medicine, Qualitative research                                                                                                                                                                                                                                                                                                                                                                                                                                                                                                                                                                                                                                                                                                                                                                                                                                                                                                                                                                                                                                                                                                                                                                                                                                                                         |
| Keywords:                       | GENERAL MEDICINE (see Internal Medicine), HEALTH SERVICES ADMINISTRATION & MANAGEMENT, Cardiology < INTERNAL MEDICINE                                                                                                                                                                                                                                                                                                                                                                                                                                                                                                                                                                                                                                                                                                                                                                                                                                                                                                                                                                                                                                                                                                                                                                                                 |
|                                 |                                                                                                                                                                                                                                                                                                                                                                                                                                                                                                                                                                                                                                                                                                                                                                                                                                                                                                                                                                                                                                                                                                                                                                                                                                                                                                                       |

SCHOLARONE™  
Manuscripts

1  
2  
3  
4  
5  
6  
7  
8  
9  
10  
11  
12  
13  
14  
15  
16  
17  
18  
19  
20  
21  
22

## **General practitioners' perspectives on the prevention of cardiovascular disease: systematic review and thematic synthesis of qualitative studies**

### **Authors' names and highest degrees**

Irene Ju<sup>1,2</sup>, Emily Banks, PhD<sup>3,4</sup>, Bianca Calabria, PhD<sup>3,5</sup>, Angela Ju, BPsych (Hons)<sup>1,2</sup>, Jason Agostino, FRACGP, BMed, MPhilAppEpi<sup>6</sup>, Rosemary J. Korda, PhD<sup>3</sup>, Tim Usherwood, MBBS, MD<sup>7</sup>, Karine Manera, MIPH<sup>1,2</sup>, Camilla S Hanson, BPsych (Hons)<sup>1,2</sup>, Jonathan C Craig, PhD<sup>1,2</sup>, Allison Tong, PhD<sup>1,2</sup>.

### **Affiliations of each author:**

<sup>1</sup>Sydney School of Public Health, The University of Sydney, Sydney, NSW 2006

<sup>2</sup>Centre for Kidney Research, The Children's Hospital at Westmead, Westmead, NSW 2145

<sup>3</sup>National Centre for Epidemiology and Population Health, Research School of Population Health, Australian National University, Canberra, Australia, ACT 0200

<sup>4</sup>Sax Institute, Ultimo, NSW 2007

<sup>5</sup>National Drug and Alcohol Research Centre, UNSW Australia, Sydney, NSW 2052

<sup>6</sup>Academic Unit of General Practice, School of Medicine, Australian National University

<sup>7</sup>Department of General Practice, Sydney Medical School Westmead, University of Sydney, Sydney, NSW 2006

### **Corresponding author:**

Irene Ju

Sydney School of Public Health, The University of Sydney, Sydney NSW 2006, Australia

Phone: +61 426 260 894      Email: [euju2374@uni.sydney.edu.au](mailto:euju2374@uni.sydney.edu.au)

**Word count (body):** 4,719

## ABSTRACT

**Objective:** CVD is a leading cause of morbidity and mortality globally, and prevention of CVD is a public health priority. This paper aims to describe the perspectives of general practitioners (GPs) on the prevention of cardiovascular disease (CVD) across different contexts.

**Design:** Systematic review and thematic synthesis of qualitative studies using the Enhancing Transparency of Reporting the Synthesis of Qualitative research (ENTREQ) framework

**Data sources:** MEDLINE, Embase, PsycINFO, and CINAHL from database inception to April 2018.

**Eligibility criteria for selecting studies:** We included qualitative studies on the perspectives of general practitioners on CVD prevention.

**Data extraction and synthesis:** We used HyperRESEARCH to code the primary papers and identified themes.

**Results:** We selected 34 studies involving 1,223 participants across nine countries. We identified six themes: defining own primary role (duty to prescribe medication, refraining from risking patients' lives, mediating between patients and specialists, delegating responsibility to patients, providing holistic care); trusting external expertise (depending on credible evidence and opinion, entrusting care to other health professionals, integrating into patient context); motivating behaviour change for prevention (highlighting tangible improvements, negotiating patient acceptance, enabling autonomy and empowerment, harnessing the power of fear, disappointment with futility of advice); recognizing and accepting patient capacities (ascertaining patient's drive for lifestyle change, conceding to ingrained habits, prioritizing urgent comorbidities, tailoring to patient environment and literacy); avoiding over-medicalization (averting long-term dependence on medications, preventing a false sense of security, minimizing stress of sickness); and minimizing economic burdens (avoiding unjustified costs to patients, delivering practice within budget, alleviating healthcare expenses).

**Conclusions:** GPs sought to empower patients to prevent CVD but consideration of patients' individual factors was challenging. Community-based strategies for assessing CVD risk involving other health professionals, and decision aids that address the individuality of the patient's health and environment, may support GPs in their decisions regarding CVD prevention.

## ARTICLE SUMMARY

### Strengths and limitations of this study:

- Qualitative studies conducted in range of settings and populations were synthesized to generate a more comprehensive understanding of decision-making and approaches to CVD prevention among general practitioners.
- Some studies did not specify whether an absolute risk assessment or individual risk factor approach was used, and differences between perspectives on primary and secondary prevention were unclear.
- Non-english articles were excluded, which may limit the transferability of the study's findings..

## INTRODUCTION

Cardiovascular disease (CVD) is the leading cause of global morbidity and mortality, contributing to over 30% of deaths worldwide(1-3). Cardiovascular events are highly preventable, through population and individual-level interventions such as smoking cessation, weight reduction, physical activity and exercise, and blood pressure and lipid lowering therapies(4).

High quality primary care is critical to CVD prevention(5, 6), due to the opportunity to assess risks and to provide lifestyle and pharmacological interventions. It is widely recommended that primary prevention of CVD be based on the assessment and management of absolute risk (7, 8), but there is evidence of research-practice gaps, with inconsistencies in the use of risk assessment tools and guidelines(8-10), advice on lifestyle interventions and prescription of preventive medications(11, 12).

While these shortfalls are likely to be due to many factors (5, 13) including challenges in managing diverse patient populations and variability in patient motivation(14), more detailed data on why this occurs at the healthcare provider level are limited, hindering practical strategies for improvement.

General practitioners (GPs) play a key role in assessment and management of CVD risk and qualitative studies have elucidated their perspectives on primary and secondary prevention of CVD. A synthesis of qualitative studies can generate a more comprehensive understanding of the reasons for decisions and approaches to CVD prevention across different settings and populations in primary care. We aimed to describe the spectrum of GP perspectives to inform strategies that may address concerns, uncertainties and the challenges in CVD prevention, to support decisions and implementation of evidence-based strategies for prevention of CVD and improved healthcare outcomes.

## METHODS

The reporting of this study follows the Enhancing Transparency of Reporting the Synthesis of Qualitative research (ENTREQ) framework(15) and the PRISMA checklist(16) (supplementary file 1)

### *Selection criteria*

Qualitative studies on the perspectives of GPs regarding the primary and secondary prevention of CVD were eligible for inclusion. GPs were defined as physicians who assumed responsibility for providing “continuing and comprehensive medical care to individuals, families, and communities”(17) and included primary care physicians and family practitioners. Studies published in peer-reviewed journals and doctoral dissertations were included. We excluded quantitative surveys, epidemiological studies (e.g. randomized trials), non-primary research articles (e.g. reviews), clinical guidelines, economic studies, and non-English articles to minimize misinterpretation in translation.

### *Data sources and searches*

We used a sensitive search strategy, which is provided in Supplementary File 2. Searches were conducted in MEDLINE, Embase, PsycINFO, and CINAHL from database inception to 15 April 2018. We searched the ProQuest Dissertation and Thesis database, British Library Electronic Digital Thesis Online Service (ETHOS) and the Europe E-theses Portal for doctoral dissertations. Primary care journals, Google Scholar and reference lists of included studies were also searched. Titles and abstracts were screened by IJ who excluded studies that did not meet the inclusion criteria. The full texts of the remaining articles were assessed for eligibility.

### *Assessment of study reporting*

To evaluate comprehensiveness and transparency of reporting in each study, we used the Consolidated Criteria for Reporting Qualitative Health Research (COREQ). The framework included reporting items specific to the research team, study methods, context of the study, analysis, and interpretations. Three



1 reviewers (IJ, AJ, and CSH) independently assessed each study, and any inconsistencies were resolved  
2  
3 by discussion.  
4  
5

### 6 7 8 *Synthesis*

9  
10 Using thematic synthesis(18), we entered all the participant quotations and text from the “results”  
11 section of each paper into the software HyperRESEARCH (version 3.0.3, ResearchWare, Inc.  
12 Randolph, MA) to code the data. Author IJ read each article line-by-line and coded text into inductively  
13 derived concepts that reflected GPs’ perspectives on the prevention of CVD. Author IJ translated  
14 concepts within and across studies by interpreting the data from the primary studies and coded text to  
15 existing concepts (that had been identified in previous studies), or by creating a new concept (that was  
16 not identified in previous studies) when necessary. Similar concepts were grouped into themes. The  
17 preliminary themes were discussed with the research team (AJ, AT) who also read the included studies.  
18 This form of investigator triangulation ensures that the full range and depth of data reported in the  
19 original studies are captured in the analysis. We identified conceptual links and developed a thematic  
20 schema. We cross-tabulated the themes with primary and secondary prevention strategies for CVD (e.g.  
21 medications, lifestyle or behavior change, risk assessment tools, and service delivery models).  
22  
23  
24  
25  
26  
27  
28  
29  
30  
31  
32  
33  
34  
35  
36  
37

### 38 *Patients and public involvement*

39  
40 Patients were not directly involved in this systematic review of general practitioners' perspectives on  
41 prevention of cardiovascular disease.  
42  
43  
44

## 45 46 **RESULTS**

### 47 48 49 50 51 *Literature search*

52  
53 Of the 7,405 articles identified in the search,, we included 34 studies, involving more than 1,223 GPs  
54 (one study did not report the number of participants, FIGURE 1). The characteristics of the studies are  
55  
56  
57  
58  
59

1 provided in TABLE 1. Across the studies, interviews, focus groups and questionnaires with open ended  
2 questions were used to collect the data.  
3  
4  
5  
6  
7

### 8 *Comprehensiveness of reporting in included studies*

9

10 The comprehensiveness of reporting varied, with studies addressing 6 to 19 of the 24 criteria for  
11 reporting of qualitative studies (TABLE 2). The participant selection strategy and the participant  
12 characteristics were reported in all 34 (100%) studies. The duration and the venue of data collection  
13 was specified in 20 (59%) and 10 (29%) studies, respectively. Twenty eight (82%) studies reported  
14 researcher triangulation, and 17 (50%) studies reported on their use of software to facilitate data  
15 analysis. Quotations were provided in 30 (88%) studies.  
16  
17  
18  
19  
20  
21  
22  
23  
24

### 25 *Synthesis*

26

27 We identified six themes: defining own primary role; trusting external expertise; motivating behaviour  
28 change for prevention; recognizing and accepting patient capacities; avoiding medicalization; and  
29 minimizing economic burdens. Selected quotations for each theme are provided in TABLE 3. The  
30 relationships among themes are shown in FIGURE 2. FIGURE 3 shows a matrix of the themes that  
31 related to each CVD prevention strategy. Most studies did not specify if perspectives related to primary  
32 or secondary prevention or a specific population (e.g. high risk), however where possible these have  
33 been delineated in the synthesis.  
34  
35  
36  
37  
38  
39  
40  
41  
42  
43  
44

### 45 **Defining own primary role**

46  
47  
48

49 *Duty to prescribe medication:* Some GPs believed their core role, as a physician, was to “offer the  
50 tablets”(19) and prescribe medicines, whereas counseling patients to make lifestyle changes was a  
51 secondary focus. Preventive medication was perceived by some as being less imposing than lifestyle  
52 changes, as it would not impede on patients’ “quality of life”(20).  
53  
54  
55  
56  
57  
58  
59  
60

1 *Refraining from risking patients' lives:* Some GPs were highly cautious and wary of putting patients'  
2 lives at risk such that they exercised absolute "vigilance" (21) and advised patients to take preventive  
3 medications regardless of their risk of CVD. This was seen as more effective in preventing CVD-  
4 related death compared with recommendations for lifestyle change – "[GPs] would always recommend  
5 preventative medication to their patients, ... 'I don't take the slightest risk with someone else's  
6 life'"(22).

7  
8  
9  
10  
11  
12  
13  
14  
15  
16 *Partnering with specialists:* As patients at high risk of CVD often had comorbidities, some GPs "co-  
17 managed"(21) their patients with specialists. "Working together"(21) with specialists meant  
18 reinforcing, to the patient, the specialist's advice and GPs believed that this would strengthen cohesive  
19 care for the patient.

20  
21  
22  
23  
24  
25  
26  
27 *Delegating responsibility to patients:* Some GPs defined their role as an "influencer"(23) in their  
28 patients' self-motivation and management. They could only provide information but believed it was  
29 ultimately the patients' duty to make lifestyle changes or take their medication. Enforcing medications  
30 and behaviour change on patients was deemed unethical and not within their professional purview, and  
31 seen as "presumptuous to make such strong demands"(20).

32  
33  
34  
35  
36  
37  
38  
39  
40 *Providing holistic care:* Some GPs emphasised their desire to take on a generalist role by providing  
41 comprehensive care and being "carers for the total patient," which included taking responsibility for  
42 lifestyle, nutrition education, and prescribing medicine. Some GPs considered that this also involved  
43 "creating a positive expectation"(20), enabling the patient to feel optimistic about the preventive  
44 strategy outcomes, which was important for patient motivation.

## Trusting external expertise

*Depending on credible evidence and opinion:* Some GPs trusted research evidence and expert opinion to feel secure about their decisions. Guidelines, risk assessment tools, and “editorials in the [British Medical Journal] BMJ”(24) were seen to minimize room for human error and were more reliable than their own judgment - “I’m comfortable to be guided by the experts rather than try and invent too much on what might be dodgy assumptions on my part.”(25)

*Entrusting care to other health professionals:* Educating patients about diet and nutrition to prevent CVD was regarded by some as being “outside their interest and expertise”(23) and believed that dietitians or other clinicians were better able to inform patients about lifestyle changes. Some GPs were enthusiastic about a team-based approach to prevention involving trained practice nurses and lifestyle advisors due to time constraints in their own consultations (26). For patients with comorbidities, some GPs considered specialists (e.g. psychiatrists, cardiologists) to have more authority in educating their patients, as they had better knowledge of the patient’s condition and medication.

*Integrating into patient context:* Some GPs considered the patient’s family history and background when determining prevention strategies. They advocated the use of “human judgment,” which incorporated “emotional, political and logistical”(19) considerations rather than accepting risk scores unconditionally. Others were unwilling to use risk scores to estimate pre-treatment risk due to ambiguity of current guidelines regarding unique patient circumstances.

## Motivating behaviour change for prevention

*Highlighting tangible improvements:* Some GPs used visual prompts to demonstrate to their patients the direct improvements in health and decrease of risk scores, which could be achieved through

1 changes to lifestyle. They believed this approach encouraged patients to make active changes by giving  
2 them “something positive to cling to”(27).  
3  
4  
5

6  
7  
8 *Negotiating patient acceptance:* When developing a strategy for preventing CVD, some GPs perceived  
9 that compromise was necessary in encouraging patients to cooperate. An explicit discussion and  
10 consideration of the patient’s goals and priorities was seen to encourage patients to “work with the  
11 doctor, not against the doctor”(28) which built trust. Some GPs co-produced a strategy with the patient  
12 that was feasible for the patient’s own situation.  
13  
14  
15  
16  
17

18  
19  
20  
21 *Enabling autonomy and empowerment:* Some GPs noted that patients with a lower risk of CVD were  
22 highly anxious about their risk factors and responded by giving patients reassurance and control over  
23 their medication and lifestyle prevention strategies. GPs perceived that patients who had a sense of  
24 autonomy and empowerment over their bodies felt more secure and willing to manage their risk factors.  
25  
26  
27  
28  
29

30  
31  
32 *Harnessing the power of fear:* When managing patients at high risk of CVD, some GPs felt that scaring  
33 patients into action was necessary and warranted. They believed that an emphasis on the consequences  
34 of disregarding and being non-adherent to prevention strategies motivated patients to accept their  
35 advice, telling their patients “if you don’t want that kind of scenario you do what I tell you”(27).  
36  
37  
38  
39  
40

41  
42  
43 *Disappointment with futility of advice:* When patients were seen to lack motivation and had “no  
44 intention of doing anything”, some GPs perceived that their efforts to encourage the patient’s uptake of  
45 prevention strategies were a “waste of time”. In failing to motivate patients, GPs questioned their  
46 ability to prevent CVD in their patients, being “[un]convinced that we do as much good as we like to  
47 think we do”(29).  
48  
49  
50  
51  
52  
53  
54  
55  
56  
57  
58  
59  
60

## Recognizing and accepting patient capacities

*Ascertaining patients' drive for lifestyle change:* Some GPs felt they had to be realistic about their patients' desires to modify their daily lives, including changes to diet, physical activity and commencing a medication regimen. When patients seemed unwilling, GPs refrained from encouraging lifestyle changes or prescribing drugs, to save their own time and resources.

*Conceding to ingrained habits:* Some GPs believed that patients who had established long-term lifestyle patterns in life (particularly patients who were obese and elderly) were unlikely to alter their habits (e.g. smoking, diet), and so did not encourage lifestyle changes. They concluded that "medications are the only hope"<sup>(30)</sup> for patients who they believed were unable to adopt preventive behaviours.

*Prioritizing urgent comorbidities:* In patients with comorbidities (e.g. diabetes, mental illness), some GPs chose to delay prescribing strategies for CVD prevention to minimize the stress in patients of having to contend with multiple treatments. They focused on the patient's primary condition until they felt that the patient was emotionally and mentally prepared to discuss CVD prevention. For patients on medication for another disease, GPs were hesitant to prescribe more medication as they expected that the complexities of poly-pharmacy reduced overall adherence.

*Tailoring to patient environment and literacy:* Some GPs recognised that health literacy varied across the patient population and communicated the level of risk of CVD by using various approaches (e.g. statistics, visual graphs, simpler words) according to the patient's educational attainment and socioeconomic status. GPs took into account the patient's environment to ensure feasibility of enacting prevention strategies e.g. – "[the patient's neighborhood was not] conducive to making lifestyle behavioural changes" with "multiple fast food outlets"<sup>(31)</sup>.

## Avoiding over-medicalization

*Averting long-term dependence on medications:* Some GPs were concerned that most patients would be inclined to opt for medications as an immediate and easy solution, rather than make lifestyle changes. This was attributed to the marketing and widespread advertising of medications in the general public. They believed that giving young patients or patients who were not at high risk a lifetime prescription of medicine for preventive purposes should be avoided by encouraging lifestyle changes instead, to prevent a dependence on medications when it was not absolutely necessary.

*Preventing a false sense of security:* Some GPs were cautious and critical of “medicaliz[ing] an unhealthy lifestyle”(20) as this encouraged patients to continue with their harmful habits (e.g. sedentary lifestyle, poor diet, smoking) and “forget about their lipid-lowering diet”(32). They noted that patients trusted the medicine to reduce their risk of CVD in spite of their lifestyle choices. With reference to medications and lifestyle modification, GPs believed that “you cannot do one thing without the other”(33) and refrained from over-prescribing medicine to prevent patients from believing that they were “immortal”(32).

*Minimizing stress of sickness:* Regardless of the patient’s level of risk for CVD, some GPs urged to avoid instilling unnecessary anxiety in patients, as “fear becomes a major problem”(29) and in turn elevates their risk further. They were hesitant to “turn individuals into patients”(19) in the context of primary prevention for patients with low risk, as tests and preventive medications heightened their anxiety about their health. For example, a GP expected that a patient with high cholesterol would be conscious of their condition, and alerting them to their risk of heart attack would “get themselves into more of a state”(27).

## 1 **Minimizing economic burdens**

2  
3  
4  
5  
6 *Avoiding unjustified costs to patients:* Some GPs especially in low socio-economic regions like  
7 Guatemala were mindful of the economic burden of long-term medication on patients and thus  
8 prescribed medications only for patients at high risk as determined by their cholesterol or blood  
9 pressure. Some were also conscious and expressed concerns about the commercial interests of  
10 pharmaceutical companies – “95% of treatment with statins is wasted” and “fuelled by the interests of  
11 the pharmaceutical industry”(22). However, others believed in the long term cost effectiveness of  
12 preventive medicine in minimizing the potential for incurring costs for treatment of CVD.  
13  
14  
15  
16  
17  
18  
19  
20  
21  
22

23 *Delivering practice within budget:* Some GPs in studies conducted in the UK and New Zealand were  
24 careful not to exceed their budget for drug prescriptions, and they were conscious of the limitations of  
25 funding available for their practice, which contended with external pressures (from pharmaceutical  
26 companies, health advertising) to offer drug treatment. GPs were more inclined to prescribe medicine  
27 for secondary prevention of CVD or for primary prevention in patients with a high risk of CVD to  
28 ensure an adequate budget for other patients in their practice.  
29  
30  
31  
32  
33  
34  
35  
36  
37

38 *Alleviating healthcare expenses:* Some GPs perceived preventive procedures (blood tests, routine  
39 checks) to be a healthcare burden when the whole population was screened regardless of risk levels or  
40 immediate illnesses. This placed them under increasing pressure due to a greater demand for general  
41 screening. They were mindful of the resources and nurse time as well as their own time spent screening  
42 for risks for primary prevention in low-risk patients, as this detracted from resources available for  
43 patients who were “actually ill”(29).  
44  
45  
46  
47  
48  
49  
50  
51  
52  
53  
54  
55  
56  
57  
58  
59  
60



## DISCUSSION

Primary care healthcare providers believed that patients needed to be empowered to continue with medications and be motivated to make lifestyle changes for the prevention of CVD, but were challenged by the complexities of considering the patient's cognitive capacities, practical circumstances, and health status. Some articulated a professional and ethical duty, to prescribe medications for prevention of CVD and subsequently minimize the risk of future CVD events that could be preventable, and to avoid taking any responsibility for risking the patients' lives. However, some had concerns about prescribing patients long-term medications, particularly in the context of primary prevention and among patients who were not deemed to be at high risk of CVD.

Providers considered preventive strategies in the context of tensions between respecting patient autonomy and being too intrusive and paternalistic in recommending behaviour change. In making decisions about prescribing medication therapy, they considered the economic impact on their local practice (particularly in the UK) and broader healthcare costs, and specifically in terms of prioritising resources for patients with more urgent illnesses than to those who were asymptomatic with risk factors.

Differences in perspectives among GPs were apparent, in part reflecting their region of practice, sociodemographics of their patient population, and the use of an absolute CVD or individual risk factor approach. In studies conducted in New Zealand, the UK and Guatemala, GPs deliberated on the financial burden of screening in the general population for primary prevention and costs of medications incurred to their patients as well as their own practice. Some GPs who practiced in low socioeconomic areas believed that advising lifestyle changes, particularly in terms of diet, were futile as they believed that patients had limited access to healthy food in their local area. In earlier studies, GPs expressed more hesitation about prescribing medications, when this was not yet common practice nor widely recommended for primary prevention (20, 25, 34). The majority of studies did not specify whether GPs

1 used an absolute risk or individual risk factor approach to management, and did not detail the risk  
2 profile of their patients (i.e. level of risk of CVD) when discussing preventive strategies. The concept  
3 of absolute risk was explicitly discussed in 17 (53%) studies, and these studies were focused on GPs  
4 perspectives on tools for assessing absolute risk for CVD prevention.  
5  
6  
7  
8  
9

10  
11  
12 Our study provides insights on the variability in decisions and approaches to CVD prevention among  
13 GPs. Approximately half of GPs use cardiovascular risk calculators and clinical guidelines (35), and  
14 those who do not use them have cited reasons including difficulties in using and interpreting the tools,  
15 and lack of applicability to their patient population in terms of age, socioeconomic background and  
16 family history. Our findings indicate that GPs may prefer to make their own judgment of individual  
17 risk factors acquired through experience rather than using absolute risk assessment tools.  
18  
19  
20  
21  
22  
23  
24  
25

26  
27 While a vast majority of GPs would recommend drug prescription where appropriate, this does not  
28 necessarily translate into rates of actual prescription. For example, a study in the UK found that only  
29 42% of patients eligible for lipid lowering drugs were prescribed them (12, 36). Our findings suggests  
30 that GPs' decisions to prescribe medication can be influenced by their perception of how likely the  
31 patient is willing to commence the regimen and how likely they are to adhere to medications. Also,  
32 some GPs expressed reluctance to "medicalize" unhealthy lifestyles and foster a false sense of security  
33 in patients through medication.  
34  
35  
36  
37  
38  
39  
40  
41  
42  
43

44 A recent study found that more than half of GPs rated their ability to motivate behaviour change for  
45 CVD prevention as being 'not good', particularly for patients who were over 65, male or obese (37).  
46 Our findings indicate that GPs believe that it may be difficult to motivate change in patients with  
47 established lifestyle habits, particularly in older or obese patients, and need a more immediate solution  
48 such as medication.  
49  
50  
51  
52  
53  
54  
55  
56  
57  
58  
59  
60

1 The themes identified in our synthesis reflect findings from studies of GPs' perspectives on the  
2 prevention of other chronic conditions such as diabetes. In a study on the prevention of type 2  
3 diabetes(38), GPs questioned their role and obligation in preventive care, where some expressed  
4 frustration at the societal pressure placed upon them to screen patients for health risks despite the lack  
5 of funding and resources. They believed that education about healthy lifestyles should be delivered via  
6 schools and community programs. Similarly, some GPs felt pressure from pharmaceutical companies to  
7 prescribe medication despite a limited budget for prescriptions within their own practice(29, 40, 67).  
8 Instead, they preferred assistance from and delegation to specialists, nursing staff and dieticians. In the  
9 context of diabetes, GPs were also concerned that resources in general practice were increasingly  
10 directed towards management of diabetes, leading to the specialization of staff (nurses, general  
11 practitioners) and a phasing out of general practice nurses. GPs similarly wanted to retain a generalist  
12 role in CVD prevention and provide comprehensive care involving all aspects of preventative health  
13 rather than a single focus on prevention of CVD(20).  
14  
15  
16  
17  
18  
19  
20  
21  
22  
23  
24  
25  
26  
27  
28  
29  
30

31 Our synthesis captured a broad range of the perspectives of GPs across different settings, and included  
32 attitudes pertaining to various CVD prevention strategies. However, there are some potential  
33 limitations. We were unable to differentiate whether GPs were using an absolute risk assessment or an  
34 individual risk factor approach, and whether perspectives were different in primary and secondary  
35 prevention, as these were not specified in most studies. Non-English articles were excluded, which  
36 could limit the transferability of the study's findings. We were unable to assess the prevalence of each  
37 theme. Systematic reviews of qualitative studies are designed to describe the range and depth of  
38 perspectives, and cannot quantify the prevalence of themes. However, Table 3 include references of the  
39 studies that contributed to each theme.  
40  
41  
42  
43  
44  
45  
46  
47  
48  
49  
50  
51  
52

53 Based on our findings, we suggest adapting or developing risk assessment tools that incorporate patient  
54 factors, motivating behaviour change in patients, and ensuring adoption of cost-effective strategies in  
55 prescribing medications. In preventive care, treatment of individual risk factors may still be used over  
56  
57  
58  
59  
60

1 absolute risk assessment, with low uptake of risk assessment tools(7, 8, 39). Greater use of absolute  
2 risk assessment tools and guidelines that explicitly address patient factors such as socioeconomic  
3 status, family history and lifestyle choices may be more useful for GPs(40-42). Motivating adherence  
4 for both behavioural and pharmaceutical changes remains a challenge for GPs. Despite behaviour  
5 change being a highly cost effective prevention strategy(43, 44), patient motivation and adherence to  
6 lifestyle advice is a barrier to preventive care (45-48). A multifaceted approach in a primary care  
7 setting involving supervised exercise sessions, follow up calls and timed medication reminders in  
8 addition to current GP services can improve patients' adherence to prescribed medication and  
9 behavioural changes, whilst addressing barriers such as time and resource constraints for GPs. Recent  
10 lifestyle intervention trials in a primary care setting revealed reductions in individual risk factors (blood  
11 pressure, obesity, cholesterol), and improvements in total mortality as well as fatal and non-fatal  
12 cardiovascular events(49-54). Recent reviews of interventions revealed that most of those resulting in  
13 long-term patient adherence to behavioural changes included other health care professionals such as  
14 nurses, pharmacists and therapists, involving more convenient care (for individual patients),  
15 reinforcement of lifestyle advice, family and psychological therapy, telephone follow-up and  
16 technological supportive care (Fitbits, text messaging, apps)(55-58).

17  
18  
19  
20  
21  
22  
23  
24  
25  
26  
27  
28  
29  
30  
31  
32  
33  
34  
35  
36  
37  
38 Our study also identified some research gaps, including perspectives on total (absolute) or individual  
39 (relative) risk assessment, effects of long term dependence on medication, guidelines for prescription in  
40 primary care and the issues of gender and family support. When referring specifically to absolute CVD  
41 risk, some GPs discussed absolute risk assessment tools, but did not talk in depth about the concept of  
42 absolute risk and how they considered this in their decision-making and practice. A distinction between  
43 assessing absolute risk and individual risk factors is important in allowing for a more consistent and  
44 evidence-based evaluation for treatment plans. Current studies also did not address primary prevention  
45 in depth specifically, and some GPs expressed hesitation when providing primary preventive care to  
46 patients as they questioned the necessity for medication in asymptomatic patients and based on  
47 theoretical risk. Greater awareness of and adherence to evidence-based guidelines on medications for  
48  
49  
50  
51  
52  
53  
54  
55  
56  
57  
58  
59

1 asymptomatic patients and risk factors may improve consistency of evaluating and managing CVD risk  
2  
3 in patients(5, 7). There was also a lack of data on GP's reflections on the role of family support. Family  
4  
5 members can facilitate and support behaviour change, by encouraging preventative lifestyle choices  
6  
7 and reminding patients to take medications (59, 60). On the other hand, family members may dissuade  
8  
9 patients from following a healthy lifestyle (60, 61). There was also limited data on gender. CVD has  
10  
11 been considered a 'man's disease', as the prevalence of CVD is higher in men compared with women  
12  
13 until the age 75 years old (62, 63). This has given rise to concerns about underestimating the risk of  
14  
15 CVD in women, and it has been shown that weight loss programs, for example, are recommended more  
16  
17 frequently to men than women (62, 64). Women may not always present with typical chest pain in  
18  
19 myocardial infarctions and coronary events, more commonly presenting with dyspnea and fatigue. This  
20  
21 makes early recognition and prevention of CVD more difficult in women (63, 64). Women can also  
22  
23 present later than men and with more comorbidities, leading to misdiagnosis and poorer health  
24  
25 outcomes (64). Women are more likely to delay seeking treatment, attribute symptoms to non-cardiac  
26  
27 causes and perceive pain levels differently to men. A combination of these factors can lead to delayed  
28  
29 treatment and implementation of preventive measures (64).  
30  
31  
32  
33  
34  
35

36 GPs believed that empowering patients to prevent CVD through adherence to lifestyle and medications  
37  
38 was needed, but found it challenging to motivate behaviour change. Some considered that clinical  
39  
40 decision-making for CVD prevention involved the patients' life stage and circumstances, capacity for  
41  
42 self-management and their environment; which were not addressed in risk assessment and decision  
43  
44 making tools. Greater availability and adaptability of evidence-based strategies for assessing and  
45  
46 managing CVD risk, including behaviour change in patients, may support decisions and  
47  
48 implementation of CVD prevention activities among GPs.  
49  
50  
51  
52

### 53 **Acknowledgements**

54  
55 We thank all participants for sharing their interesting thoughts and perspectives for this study.  
56  
57  
58  
59  
60

## Contributions

IJ participated in the design of the search strategy, conducted the search, screened the studies, carried out thematic analysis and drafted the manuscript. AT designed the search strategy, participated in the thematic analysis and was the primary reviewer for the manuscript. EB, BC, AJ, JA, RK, TU, KM, CH, and JC provided a critical review of the manuscript, and provided final approval of the version to be published.

## Ethics approval

This study did not require an ethics approval

## Funding statement:

The work was supported by a National Health and Medical Research Council of Australia Partnership Grant [1092674], including support from the National Heart Foundation of Australia. AT is supported by a NHMRC Fellowship [1106716].

## Declaration of competing interests

The authors do not have any competing interests or conflicts of interest to declare

## Data sharing

No additional data are available

## References

1. O'Rourke K, VanderZanden A, Shepard D. Cardiovascular Disease Worldwide, 1990-2013. *J Am Med Assoc.* 2015;314(18 ).
2. WHO. Cardiovascular diseases (CVDs). 2016.
3. Deaton C, Froelicher E, Wu L, et al. The global burden of cardiovascular disease. *Eur J Cardiovasc Nurs.* 2011;10 (Suppl 2):S5-13.
4. Ezzati M, Obermeyer Z, Tzoulaki I, et al. Contributions of risk factors and medical care to cardiovascular mortality trends. *Nat Rev Cardiol.* 2015;12:508-30.
5. Volker N, Davey R, Cochrane T, et al. Improving the Prevention of Cardiovascular Disease in Primary Health Care: The Model for Prevention Study Protocol. *J Med Internet Res.* 2014;3(3):e33.
6. Harris M, Lloyd J. The role of Australian primary health care in the prevention of chronic disease *ADMA.* 2012 September 28.
7. Jansen J, Bonner C, McKinn S, et al. General practitioners' use of absolute risk versus individual risk factors in cardiovascular disease prevention: an experimental study. *BMJ open.* 2014;15(4).
8. Gupta R, Stocks N, Broadbent J. Cardiovascular risk assessment in Australian General Practice. *Aust Fam Physician.* 2009;38(5):364-8.
9. Dallongeville J, Banegas JR, Halcox J, et al. Physicians' attitudes towards cardiovascular guidelines and risk assessment tools: Relation with the management of risk factors in the primary prevention setting. *Eur Heart J.* 2011;32:973.
10. Bell A. How Does the Use of Atrial Fibrillation Patient Tools for Stroke & Bleeding Risk Assessment (CHADS2/CHADSVASC/HAS-BLED) in Canada Impact Prescribing Habits? *Can J Cardiol.* 2012;28(5).
11. Kones R. Rosuvastatin, inflammation, C-reactive protein, JUPiTeR, and primary prevention of cardiovascular disease – a perspective. *Drug Des Devel Ther.* 2010;4:383-413.
12. Wutzler A, Bannehr M, Pohlmann AC, et al. The use of direct oral anticoagulants for stroke prevention in atrial fibrillation: A study on physicians' perspective and preferences. *Int J Cardiol.* 2014;175(1):188-91.
13. Haigh K, Bingley J, Golledge J, et al. Barriers to screening and diagnosis of peripheral artery disease by general practitioners. *Vasc Med.* 2013;18(6):325-30.
14. Jansen J, McKinn S, Bonner C, et al. General Practitioners' Decision Making about Primary Prevention of Cardiovascular Disease in Older Adults: A Qualitative Study. *PLoS One.* 2017;12(1):e0170228.

- 1 15. Tong A, Flemming KD, McInnes E, et al. Enhancing Transparency in reporting the synthesis of  
2 qualitative research: ENTREQ. *BMC Med Res Methodol.* 2012;12(181).
- 3  
4  
5 16. Moher D, Liberati A, Tetzlaff J, Altman DG, The PRISMA Group (2009). Preferred Reporting Items for  
6 Systematic Reviews and Meta-Analyses: The PRISMA Statement. *BMJ* 2009;339:b2535
- 7  
8  
9 17. OECD. OECD Health Statistics 2016. Definitions, Sources and Methods. 2016
- 10  
11 18. Thomas J, Harden A. Methods for the thematic synthesis of qualitative research in systematic reviews.  
12 *BMC Med Res Methodol.* 2008;8(45).
- 13  
14  
15 19. Greenfield S, Bryan S, Gill P, et al. Factors influencing clinicians' decisions to prescribe medication to  
16 prevent coronary heart disease. *J Clin Pharm Ther.* 2005;30(1):77-84.
- 17  
18  
19 20. Silwer L, Wahlstrom R, Lundborg CS. Views on primary prevention of cardiovascular disease--an  
20 interview study with Swedish GPs. *BMC Fam Pract.* 2010;11:44.
- 21  
22  
23 21. Bartels CM, Roberts TJ, Hansen KE, et al. Rheumatologist and Primary Care Management of  
24 Cardiovascular Disease Risk in Rheumatoid Arthritis: Patient and Provider Perspectives. *Arthritis Care Res.*  
25 2016;68(4):415-23.
- 26  
27  
28  
29 22. Gale NK, Greenfield S, Gill P, et al. Patient and general practitioner attitudes to taking medication to  
30 prevent cardiovascular disease after receiving detailed information on risks and benefits of treatment: a  
31 qualitative study. *BMC Fam Pract.* 2011;12:59.
- 32  
33  
34  
35 23. Pomeroy SE, Worsley A. Nutrition care for adult cardiac patients: Australian general practitioners'  
36 perceptions of their roles. *Fam Pract.* 2008;25 Suppl 1:i123-9.
- 37  
38  
39 24. Fairhurst K, Huby G. From trial data to practical knowledge: qualitative study of how general  
40 practitioners have accessed and used evidence about statin drugs in their management of hypercholesterolaemia.  
41 *BMJ.* 1998;317(7166):1130-4.
- 42  
43  
44  
45 25. Bonner C, Jansen J, McKinn S, et al. General practitioners' use of different cardiovascular risk  
46 assessment strategies: a qualitative study. *Med J Aust.* 2013;199(7):485-9.
- 47  
48  
49 26. Volker N, Williams LT, Davey RC, et al. Implementation of cardiovascular disease prevention in  
50 primary health care: enhancing understanding using normalisation process theory. *BMC Fam Pract.*  
51 2017;18(28).
- 52  
53  
54  
55  
56  
57  
58  
59  
60



- 1  
2  
3  
4  
5  
6  
7  
8  
9  
10  
11  
12  
13  
14  
15  
16  
17  
18  
19  
20  
21  
22  
23  
24  
25  
26  
27  
28  
29  
30  
31  
32  
33  
34  
35  
36  
37  
38  
39  
40  
41  
42  
43  
44  
45  
46  
47  
48  
49  
50  
51  
52  
53  
54  
55  
56  
57  
58  
59  
60
27. Bonner C, Jansen J, McKinn S, et al. Communicating cardiovascular disease risk: an interview study of General Practitioners' use of absolute risk within tailored communication strategies. *BMC Fam Pract*. 2014;15:106.
28. Wan Q, Harris MF, Zwar N, et al. Prerequisites for implementing cardiovascular absolute risk assessment in general practice: a qualitative study of Australian general practitioners' and patients' views. *J Eval Clin Pract*. 2010;16(3):580-4.
29. Williams SJ, Calnan M. Perspectives on prevention: the views of General Practitioners. *Sociol Health Illn*. 1994;16(3):372-93.
30. Speechly C, Bridges-Webb C, McKenzie S, et al. Patient and general practitioner attitudes to healthy lifestyle behaviours and medication following coronary heart disease: an exploratory study. *Aust J Prim Health*. 2010;16(2):154-8.
31. Doolan-Noble F, Tracey J, Mann S. Why are there gaps in our management of those with high cardiovascular risk? *J Prim Health Care*. 2012;4(1):21-9.
32. Kedward J, Dakin L. A qualitative study of barriers to the use of statins and the implementation of coronary heart disease prevention in primary care. *Br J Gen Pract*. 2003;53(494):684-9.
33. Bonner C, Jansen J, McKinn S, et al. How do general practitioners and patients make decisions about cardiovascular disease risk? *Health Psychol*. 2015;34(3):253-61.
34. Pharm E, Rolandsson O, Johansson EE. 'Aiming for the stars - GPs' dilemmas in the prevention of cardiovascular disease in type 2 diabetes patients: Focus group interviews. *Fam Pract*. 2009;26(2):109-14.
35. Schmieder RE, Goebel M, Bramlage P. Barriers to cardiovascular risk prevention and management in Germany – an analysis of the EURIKA study. *Vasc Health Risk Manag*. 2012;8:177-86.
36. Wu J, Zhu S, Yao G, et al. Patient Factors Influencing the Prescribing of Lipid Lowering Drugs for Primary Prevention of Cardiovascular Disease in UK General Practice: A National Retrospective Cohort Study. *PLoS One*. 2013;8(7):e67611.
37. Diehl K, Mayer M, Mayer F, et al. Physical activity counseling by primary care physicians: attitudes, knowledge, implementation, and perceived success. *J Phys Act Health*. 2015;12(2):216-23.
38. Williams R, Rapport F, Elwyn G, et al. The prevention of type 2 diabetes: general practitioner and practice nurse opinions. *Br J Gen Pract*. 2004;54(504):531-5.
39. Chauhan U. Cardiovascular disease prevention in primary care. *Br Med Bull* 2007;81-82(1):65-79.

- 1 40. Goff DC, Lloyd-Jones D, Bennett G, et al. ACC/AHA guideline on the assessment of cardiovascular  
2 risk: A report of the American College of Cardiology/American Heart Association Task Force on Practice  
3 Guidelines. *Circ*. 2013;129:S49-S73.  
4  
5  
6  
7 41. Anderson T, Grégoire J, Hegele R, et al. 2012 Update of the Canadian Cardiovascular Society  
8 Guidelines for the Diagnosis and Treatment of Dyslipidemia for the Prevention of Cardiovascular Disease in the  
9 Adult. *Can J Cardiol*. 2013;29:151-67.  
10  
11  
12  
13 42. Piepoli M, Hoes A, Agewall S, et al. 2016 European Guidelines on cardiovascular disease prevention in  
14 clinical practice. *Eur Heart J*. 2016;37:2315-81.  
15  
16  
17 43. WHO. Obesity: Preventing and Managing the Global Epidemic. 1998(894).  
18  
19 44. Mills KT, Dolan J, Bazzano LA, et al. Comprehensive Approach for Hypertension Control in Low-Income  
20 Populations: Rationale and Study Design for the Hypertension Control Program in Argentina. *Am J Med Sci*.  
21 2014;348(2):139-45.  
22  
23  
24  
25 45. Barfoed BL, Paulsen MS, Christensen PM, et al. Associations between patients' adherence and GPs'  
26 attitudes towards risk, statin therapy and management of non-adherence--a survey and register-based study. *Fam*  
27 *Pract*. 2016;33(2).  
28  
29  
30  
31 46. Koelewijn-van Loon MS, van Steenkiste B, Ronda G, et al. Improving patient adherence to lifestyle  
32 advice (IMPALA): a cluster-randomised controlled trial on the implementation of a nurse-led intervention for  
33 cardiovascular risk management in primary care. *BMC Health Serv Res*. 2008;8(9).  
34  
35  
36  
37 47. Sebaste E, WHO. Adherence to long-term therapies. Evidence for action. WHO 2003.  
38  
39 48. Hobbs FD, Erhardt L. Acceptance of guideline recommendations and perceived implementation of  
40 coronary heart disease prevention among primary care physicians in five European countries: the Reassessing  
41 European Attitudes about Cardiovascular Treatment (REACT) survey. *Fam Pract*. 2002;19(6):596-604.  
42  
43  
44  
45 49. Ebrahim S, Taylor F, Ward K, et al. Multiple risk factor interventions for primary prevention of  
46 coronary heart disease. *Cochrane Database Syst Rev*. 2011;1(CD001561).  
47  
48  
49 50. Eriksson M, Franks P, Eliasson M. A 3-year randomized trial of lifestyle intervention for cardiovascular  
50 risk reduction in the primary care setting: the Swedish Bjorknas study. *PLoS One*. 2009 4(4):e5195.  
51  
52  
53 51. Folta S, Lichtenstein A, Seguin R, et al. The StrongWomen-Healthy Hearts program: reducing  
54 cardiovascular disease risk factors in rural sedentary, overweight, and obese midlife and older women. *Am J*  
55 *Public Health*. 2009;99(7):1271-7.  
56  
57  
58  
59  
60

- 1  
2  
3  
4  
5  
6  
7  
8  
9  
10  
11  
12  
13  
14  
15  
16  
17  
18  
19  
20  
21  
22  
23  
24  
25  
26  
27  
28  
29  
30  
31  
32  
33  
34  
35  
36  
37  
38  
39  
40  
41  
42  
43  
44  
45  
46  
47  
48  
49  
50  
51  
52  
53  
54  
55  
56  
57  
58  
59  
60
52. Wister A, Loewen N, Kennedy-Symonds H, et al. One-year follow-up of a therapeutic lifestyle intervention targeting cardiovascular disease risk. *CMAJ*. 2007;177(8):859-65.
53. Alliance NVDP. Guidelines for the management of absolute cardiovascular risk 2012.
54. Murphy E, Vellinga A, Byrne M, et al. Primary care organisational interventions for secondary prevention of ischaemic heart disease: a systematic review and meta-analysis. *Br J Gen Pract*. 2015;65(636):e460-e8.
55. Haynes R, Ackloo E, Sahota N, et al. Interventions for enhancing medication adherence. *Cochrane Database Syst Rev*. 2008;2(CD000011).
56. Glynn L, Murphy A, Smith S, et al. Interventions used to improve control of blood pressure in patients with hypertension. *Cochrane Database Syst Rev*. 2010 3(CD005182).
57. Ogedegbe G, Schoenthaler A. A systematic review of the effects of home blood pressure monitoring on medication adherence. *J Clin Hypertens* (Greenwich). 2006;8(3):174-80.
58. Khan N, Marvel FA, Wang J, et al. Digital Health Technologies to Promote Lifestyle Change and Adherence. *Curr Treat Options Cardio Med*. 2017;19(60).
59. Cole JA, Smith SM, Hart N, et al. Do Practitioners and friends support patients with a coronary heart disease in lifestyle change? A qualitative study. *BMC Fam Pract*. 2013;14:126
60. Falba TA, Sindelar JL. Spousal concordance in health behaviour change. *Health Serv Res*. 2008;43(1 Pt 1):96-116
61. Rosland A, Heisler M, Piette JD. The impact of family behaviours and communication patterns on chronic illness outcomes: A systematic review. *J Behav Med*. 2012;35(2):221-239.
62. Mosca L, Barrett-Connor E, Wenger NK. Sex/gender differences in cardiovascular disease prevention what a difference a decade makes. *Circulation*. 2011;124(19):2145-2154.
63. Chesler RM, Ho DW, Ramkissoon K. Women and cardiovascular disease: gender-based issues regarding detection and primary prevention. *SciRes*. 2014;6:2790-2801
64. Finks SW, Spencer A, Hume A. Cardiovascular disease in women. *Pharm Self Assessment Program*. 2010;1:179-199.
65. Liu H, Massi L, Laba TL, et al. Patients' and providers' perspectives of a polypill strategy to improve cardiovascular prevention in Australian primary health care: a qualitative study set within a pragmatic randomized, controlled trial. *Circ Cardiovasc Qual Outcomes*. 2015;8(3):301-8.

- 1  
2  
3  
4  
5  
6  
7  
8  
9  
10  
11  
12  
13  
14  
15  
16  
17  
18  
19  
20  
21  
22  
23  
24  
25  
26  
27  
28  
29  
30  
31  
32  
33  
34  
35  
36  
37  
38  
39  
40  
41  
42  
43  
44  
45  
46  
47  
48  
49  
50  
51  
52  
53  
54  
55  
56  
57  
58  
59  
60
66. Wan Q, Harris MF, Zwar N, et al. Sharing risk management: an implementation model for cardiovascular absolute risk assessment and management in Australian general practice. *Int J Clin Pract*. 2008;62(6):905-11.
67. Lebeau JP, Cadwallader JS, Vaillant-Roussel H, et al. General practitioners' justifications for therapeutic inertia in cardiovascular prevention: An empirically grounded typology. *BMJ Open*. 2016;6(5).
68. Montano C, Estrada K, Chavez A, et al. Perceptions, knowledge and beliefs about prevention of cardiovascular diseases in Villa Nueva, Guatemala. *Prev Control*. 2008;3:1-9.
69. Nielen MM, Assendelft WJ, Drenthen AJ, et al. Primary prevention of cardio-metabolic diseases in general practice: a Dutch survey of attitudes and working methods of general practitioners. *Eur J Gen Pract*. 2010;16(3):139-42.
70. Sapre N, Mann S, Elley CR. Doctors' perceptions of the prognostic benefit of statins in patients who have had myocardial infarction. *Int Med J*. 2009;39(5):277-82.
71. Torley D, Zwar N, Comino EJ, et al. GPs' views of absolute cardiovascular risk and its role in primary prevention. *Aust Fam Physician*. 2005;34(6):503-4, 7.
72. Weiner M, Wells S, Kerse N. Perspectives of general practitioners towards evaluation and treatment of cardiovascular diseases among older people. *J Prim Health Care*. 2009;1(3):198-206.
73. Wahlstrom R, Owe Dahlgren L, Tomson G, et al. Perspectives on prevention: the views of General Practitioners. *Adv Health Sci Educ*. 1997;2:221-36.
74. Fisseni G, Lewis DK, Abholz HH. Understanding the concept of medical risk reduction: a comparison between the UK and Germany. *Eur J Gen Pract*. 2008;14(3-4):109-16.
75. Lewis DK, Robinson J, Wilkinson E. Factors involved in deciding to start preventive treatment: qualitative study of clinicians' and lay people's attitudes. *BMJ*. 2003;327(7419):841.
76. Liew SM, Blacklock C, Hislop J, et al. Cardiovascular risk scores: qualitative study of how primary care practitioners understand and use them. *Br J Gen Pract*. 2013;63(611):e401-7.
77. Macintosh MJ, Lacey EA, Tod AM. Secondary prevention for coronary heart disease: a qualitative study. *Br J Nurs*. 2003;12(8):462-9.
78. Summerskill WS, Pope C. 'I saw the panic rise in her eyes, and evidence-based medicine went out of the door.' An exploratory qualitative study of the barriers to secondary prevention in the management of coronary heart disease. *Fam Pract*. 2002;19(6):605-10.

- 1  
2  
3  
4  
5  
6  
7  
8  
9  
10  
11  
12  
13  
14  
15  
16  
17  
18  
19  
20  
21  
22  
23  
24  
25  
26  
27  
28  
29  
30  
31  
32  
33  
34  
35  
36  
37  
38  
39  
40  
41  
42  
43  
44  
45  
46  
47  
48  
49  
50  
51  
52  
53  
54  
55  
56  
57  
58  
59  
60
79. Virdee SK, Greenfield SM, Fletcher K, et al. Would primary healthcare professionals prescribe a  
polypill to manage cardiovascular risk? A qualitative interview study. *BMJ Open*. 2013;3(3).
80. Wright CA, Osborn DPJ, Nazareth I, et al. Prevention of coronary heart disease in people with severe  
mental illnesses: A qualitative study of patient and professionals' preferences for care. *BMC Psychiatry*.  
2006;6(16).
81. Rosal MC, Ockene JK, Luckmann R, et al. Coronary heart disease multiple risk factor reduction  
providers' perspectives. *Am J Prev Med* 2004;27(2S):54-60.
82. Tanner RM, Safford MM, Monda KL, et al. Primary care physician perspectives on barriers to statin  
treatment. *Cardiovasc Drugs Ther*. 2017;31:303-9.

1  
2  
3  
4  
5  
6  
7  
8  
9  
10  
11  
12  
13  
14  
15  
16  
17  
18  
19  
20  
21  
22  
23  
24  
25  
26  
27  
28  
29  
30  
31  
32  
33  
34  
35  
36  
37  
38  
39  
40  
41  
42  
43  
44  
45  
46  
47  
48  
49  
50  
51  
52  
53  
54  
55  
56  
57  
58  
59  
60

**Figure legends**

**FIGURE 1. Search results**

**FIGURE 2. Matrix of preventions strategies and themes**

**FIGURE 3. Thematic schema**

For peer review only

TABLE 1. Characteristics of included studies

| Study ID                      | GPs (n*) | Patient population             | Prevention |           | Risk     |          | Conceptual methodological framework | Data collection                              | Analysis            | CVD prevention topic area and scope |
|-------------------------------|----------|--------------------------------|------------|-----------|----------|----------|-------------------------------------|----------------------------------------------|---------------------|-------------------------------------|
|                               |          |                                | Primary    | Secondary | Absolute | Relative |                                     |                                              |                     |                                     |
| <b>Australia</b>              |          |                                |            |           |          |          |                                     |                                              |                     |                                     |
| Bonner 2013 <sup>(25)</sup>   | 25       | General                        | NS         |           | •        |          | Phenomenological                    | Semi-structured interview                    | Framework analysis  | Risk assessment                     |
| Bonner 2014 <sup>(27)</sup>   | 25       | General                        | NS         |           | •        |          | Qualitative                         | Semi-structured interview                    | Framework analysis  | Risk assessment                     |
| Bonner 2015 <sup>(33)</sup>   | 25       | General                        | NS         |           | •        |          | Qualitative                         | Semi-structured interview                    | Framework analysis  | Risk assessment                     |
| Liu 2015 <sup>(65)</sup>      | 25       | Indigenous                     | •          |           | •        |          | Qualitative                         | Semi-structured interviews                   | Thematic analysis   | Medication                          |
| Pomeroy 2008 <sup>(23)</sup>  | 30       | General                        | NS         |           | NS       |          | Multi methods                       | Semi-structured interviews and questionnaire | Conceptual analysis | Lifestyle change                    |
| Speechly 2010 <sup>(30)</sup> | 8        | Primary coronary heart disease |            | •         | •        |          | Qualitative                         | Semi-structured interviews                   | Thematic analysis   | Lifestyle change/ Medication        |
| Volker 2017 <sup>(26)</sup>   | 11       | General                        | •          |           | •        |          | Qualitative                         | Semi-structured interviews                   | Framework analysis  | Risk assessment                     |
| Wan 2008 <sup>(66)</sup>      | 22       | High risk CV factor            | •          |           | •        |          | Qualitative                         | Focus groups and semi structured interview   | Thematic analysis   | Risk assessment                     |
| Wan 2010 <sup>(28)</sup>      | 22       | High risk CV factor            | •          |           | •        |          | Qualitative                         | Focus groups                                 | Thematic analysis   | Risk assessment                     |
| <b>France</b>                 |          |                                |            |           |          |          |                                     |                                              |                     |                                     |
| Lebeau 2016 <sup>(67)</sup>   | 125      | High risk hypertensive         | •          |           | NS       |          | Qualitative                         | Open ended questionnaire                     | Thematic analysis   | Medication                          |
| <b>Guatemala</b>              |          |                                |            |           |          |          |                                     |                                              |                     |                                     |
| Montano 2008 <sup>(68)</sup>  |          | General                        | NS         |           | NS       |          | Qualitative                         | Focus group discussions and in-depth         | Thematic analysis   | Lifestyle change                    |

1  
2  
3  
4  
5  
6  
7  
8  
9  
10  
11  
12  
13  
14  
15  
16  
17  
18  
19  
20  
21  
22  
23  
24  
25  
26  
27  
28  
29  
30  
31  
32  
33  
34  
35  
36  
37  
38  
39  
40  
41  
42  
43  
44  
45  
46  
47

|                                   |     |                               |    |   |    |   |                   |                                                     |                              |                                |  |
|-----------------------------------|-----|-------------------------------|----|---|----|---|-------------------|-----------------------------------------------------|------------------------------|--------------------------------|--|
|                                   |     |                               |    |   |    |   |                   | interviews                                          |                              |                                |  |
| <b>Netherlands</b>                |     |                               |    |   |    |   |                   |                                                     |                              |                                |  |
| Nielen 2010 <sup>(69)</sup>       | 330 | General                       | •  |   | NS |   | Qualitative       | Open ended questionnaire                            | Thematic analysis            | Lifestyle change               |  |
| <b>New Zealand</b>                |     |                               |    |   |    |   |                   |                                                     |                              |                                |  |
| Doolan-Noble 2012 <sup>(31)</sup> | 29  | High CVD risk                 | •  |   | •  |   | Qualitative       | Focus group                                         | Thematic analysis            | barriers and facilitators      |  |
| Sapre 2009 <sup>(70)</sup>        | 20  | Primary myocardial infarction |    | • | •  | • | Qualitative       | Semi-structured interview                           | Conceptual analysis          | Medication                     |  |
| Torley 2005 <sup>(71)</sup>       | 36  | General                       | •  |   | •  |   | Qualitative       | Focus groups                                        | Thematic analysis            | Risk assessment                |  |
| Weiner 2009 <sup>(72)</sup>       | 86  | Older people                  | NS |   | •  |   | Qualitative       | Questionnaire                                       | Thematic analysis            | Risk assessment and management |  |
| <b>Scotland</b>                   |     |                               |    |   |    |   |                   |                                                     |                              |                                |  |
| Fairhurst 1998 <sup>(24)</sup>    | 24  | General                       | •  | • | NS |   | Qualitative       | Semi-structured interview                           | NS                           | Medication                     |  |
| <b>Sweden</b>                     |     |                               |    |   |    |   |                   |                                                     |                              |                                |  |
| Fharm 2009 <sup>(34)</sup>        | 14  | Type 2 diabetes               | NS |   | NS |   | Qualitative       | Focus group                                         | qualitative content analysis | Lifestyle changes/medication   |  |
| Silwer 2010 <sup>(20)</sup>       | 21  | General                       | •  |   | •  |   | Qualitative       | Semi-structured interview                           | Thematic analysis            | Medication                     |  |
| Wahlstrom 1997 <sup>(73)</sup>    | 20  | General                       | •  | • | NS |   | Phenomenologic al | Semi-structured Interview                           | Conceptual analysis          | Medication                     |  |
| <b>United Kingdom</b>             |     |                               |    |   |    |   |                   |                                                     |                              |                                |  |
| Fisseni 2008 <sup>(74)</sup>      | 6   | General                       | NS |   | •  |   | Qualitative       | Semi-structured interview                           | qualitative content analysis | Risk assessment                |  |
| Gale 2011 <sup>(22)</sup>         | 13  | General                       | •  |   | •  | • | Qualitative       | Semi-structured Interview                           | Thematic analysis            | Medication                     |  |
| Greenfield 2005 <sup>(19)</sup>   | 192 | General                       | NS |   | NS |   | Qualitative       | Closed question postal questionnaire with free text | Thematic analysis            | Medication                     |  |



1  
2  
3  
4  
5  
6  
7  
8  
9  
10  
11  
12  
13  
14  
15  
16  
17  
18  
19  
20  
21  
22  
23  
24  
25  
26  
27  
28  
29  
30  
31  
32  
33  
34  
35  
36  
37  
38  
39  
40  
41  
42  
43  
44  
45  
46  
47

|                                   |    |                                  |    |    |    |   |             | comments                                |                     |                                |
|-----------------------------------|----|----------------------------------|----|----|----|---|-------------|-----------------------------------------|---------------------|--------------------------------|
| Kedward 2003 <sup>(32)</sup>      | 26 | General                          | •  | •  | NS |   | Qualitative | Semi-structured interview               | Thematic analysis   | Medication                     |
| Lewis 2003 <sup>(75)</sup>        | 4  | General                          | NS |    | •  |   | Qualitative | Semi-structured interview               | Thematic analysis   | Medication                     |
| Liew 2013 <sup>(76)</sup>         | 20 | General                          | •  |    | •  | • | Qualitative | Face-to-face semi-structured interviews | Thematic analysis   | Risk assessment                |
| Macintosh 2003 <sup>(77)</sup>    | 18 | Primary coronary heart disease   |    | •  | NS |   | Qualitative | Semi-structured interviews              | Conceptual analysis | Nurse-led clinics              |
| Summerskil I 2002 <sup>(78)</sup> | 14 | Secondary coronary heart disease |    | NS | NS |   | Qualitative | Semi-structured interviews              | Thematic analysis   | Barriers and facilitators      |
| Virdee 2013 <sup>(79)</sup>       | 11 | General                          | •  | •  | NS |   | Qualitative | Semi structured interview               | Thematic analysis   | Medication                     |
| Williams 1994 <sup>(29)</sup>     | 40 | General                          | •  | •  | NS |   | Qualitative | In depth interview                      | Thematic analysis   | Lifestyle change/ Medication   |
| Wright 2006 <sup>(80)</sup>       | 10 | Severe mental illness            | •  |    | NS |   | Qualitative | In-depth interviews                     | Thematic analysis   | Lifestyle change/ Medication   |
| <b>United States of America</b>   |    |                                  |    |    |    |   |             |                                         |                     |                                |
| Bartels 2016 <sup>(21)</sup>      | 9  | Rheumatoid arthritis             | NS |    | NS |   | Qualitative | Semi-structured interview               | Grounded theory     | Risk assessment and management |
| Rosal 2004 <sup>(81)</sup>        | 11 | High risk coronary heart disease | NS |    | •  |   | Qualitative | Focus groups                            | Thematic analysis   | Lifestyle change/ Medication   |
| Tanner 2017 <sup>(82)</sup>       | 23 | Secondary coronary heart disease |    | •  | NS |   | Qualitative | Group interviews                        | Thematic analysis   | Medication                     |

\*n= general practitioners (including primary care physicians); •, type of prevention and risk specified in the study; CVD, cardiovascular disease; CV, cardiovascular; NS, not stated; UK, United Kingdom; US, United State

**TABLE 2. Completeness of reporting in the included studies**

| Item                                                                                   | Studies reporting each item                              | Number of studies (%) |
|----------------------------------------------------------------------------------------|----------------------------------------------------------|-----------------------|
| <b>Personal Characteristics</b>                                                        |                                                          |                       |
| Interviewer / facilitator identified                                                   | (19, 20, 23-25, 27, 30, 32-34, 65, 67, 70, 78, 79)       | 15 (44)               |
| Experience or training in qualitative research                                         | (27, 32, 33, 65, 81)                                     | 5 (15)                |
| <b>Relationship with participants</b>                                                  |                                                          |                       |
| Relationship established prior to study commencement                                   | (26, 32, 65, 67, 74-76, 82)                              | 8 (24)                |
| <b>Participant Selection</b>                                                           |                                                          |                       |
| Selection strategy ( <i>e.g. snowball, purposive, convenience, comprehensive</i> )     | (19-26, 27-34, 65-82)                                    | 34 (100)              |
| Method of approach or recruitment                                                      | (19-23, 25-27, 28, 30-34, 65-76, 78-82)                  | 31 (91)               |
| Sample size                                                                            | (19-26, 27-34, 65-82)                                    | 34 (100)              |
| Number and/or reasons for non-participation                                            | (20, 21, 24, 25, 26, 27-30, 32-34, 65, 69-73, 75, 78-80) | 22 (65)               |
| <b>Setting</b>                                                                         |                                                          |                       |
| Venue of data collection                                                               | (19, 26, 65, 67, 68, 74-77, 82)                          | 10 (29)               |
| Presence of non-participants ( <i>e.g. clinical staff</i> )                            | (26, 31, 34, 74, 82)                                     | 5 (15)                |
| Description of the sample                                                              | (19-26, 27-34, 65-76, 79-82)                             | 32 (94)               |
| <b>Data Collection</b>                                                                 |                                                          |                       |
| Questions, prompts or topic guide                                                      | (19-26, 27-34, 65-76, 78-82)                             | 33 (97)               |
| Repeat interviews / observations                                                       | (22, 23, 31, 34, 73, 80)                                 | 6 (18)                |
| Audio / visual recording                                                               | (20, 21, 23-26, 27-34, 65-68, 70, 71, 73-79, 81-83)      | 30 (88)               |
| Field notes                                                                            | (26, 28, 34, 68, 70, 71, 79)                             | 7 (21)                |
| Duration of data collection (interview or focus group)                                 | (20, 21, 25, 26, 28, 31, 34, 65, 66, 72-82)              | 20 (59)               |
| Protocol for data preparation and transcription                                        | (19-28, 30-34, 65-70, 72-77, 79-82)                      | 31 (91)               |
| Data (or theoretical) saturation                                                       | (21, 22, 25, 27, 32-34, 65, 66, 76, 79, 80)              | 12 (36)               |
| <b>Data Analysis</b>                                                                   |                                                          |                       |
| Researcher/expert triangulation (multiple researchers involved in coding and analysis) | (19-21, 23-26, 27-34, 65-67, 71, 73-80, 82)              | 28 (82)               |
| Derivation of themes or findings ( <i>e.g. inductive, constant comparison</i> )        | (19-26, 27-34, 65-68, 71-82)                             | 32 (94)               |
| Use of software ( <i>e.g. NVivo, HyperRESEARCH, Atlas.ti</i> )                         | (20, 21, 23, 26, 28-30, 65-68, 70, 73, 76-78, 80)        | 17 (50)               |
| Participant feedback on findings                                                       | (21, 23, 31, 32, 73, 79)                                 | 6 (18)                |

---

**Reporting**

---

Participant quotations or raw data provided (*picture, diary entries*) (19-22, 24-26, 27-34, 65-67, 70-75, 77-82) 30 (88)

---

Range and depth of insight into participant perspectives (*thick description provided*) (19-26, 27-34, 65-68, 73-75, 78-81) 27 (79)

---

For peer review only

**TABLE 3. Selected quotations from primary studies to illustrate each theme**

| Theme                                      | Quotations                                                                                                                                                                                                                                                                                                                                                                                                                                                                                                                                                                                                                                                                                      | Contributing Studies                 |
|--------------------------------------------|-------------------------------------------------------------------------------------------------------------------------------------------------------------------------------------------------------------------------------------------------------------------------------------------------------------------------------------------------------------------------------------------------------------------------------------------------------------------------------------------------------------------------------------------------------------------------------------------------------------------------------------------------------------------------------------------------|--------------------------------------|
| <b>Defining own primary role</b>           |                                                                                                                                                                                                                                                                                                                                                                                                                                                                                                                                                                                                                                                                                                 |                                      |
| Duty to prescribe medication               | <p>“...but it’s not prevention if you think that it’s just diet and physical exercise... if we don’t provide medical treatment for them...”(34)</p> <p>“Some GPs regarded themselves as responsible for the care and treatment of the patient and would intervene when necessary. They would act as active coaches and prescribe adequate medical treatment when needed to prevent cardiovascular complications.”(34)</p> <p>“Non-pharmaceutical treatment is not effective and it is important, in primary prevention, to avoid negative impacts on quality of life through changes in lifestyle, since we are mostly dealing with people who feel healthy before they get treatment.”(20)</p> | (19, 20, 32, 34)                     |
| Refraining from risking patients’ lives    | <p>“he would always recommend preventative medication to their patients, saying ‘ I don’ t take the slightest risk with someone else’ s life””(22)</p> <p>“Professional vigilance: Provider’s attention and alertness to seek and review information or knowledge about a patient’s risk”(21)</p> <p>“it is worth treating anyone at risk of cardiovascular disease (with the patient’s co-operation and full knowledge of the facts), however small the risk”(19)</p> <p>“the drug would ‘reduce the chance of further coronary events””(70)</p>                                                                                                                                               | (19, 21, 22, 70)                     |
| Mediating between patients and specialists | <p>“I am really trying to, as a primary care doctor, work on. . .the importance of preventing cardiovascular disease. . . and the increased risk with these inflammatory conditions. . .So I think that’s a good co-manage thing, where the rheumatologist can stress that, and then I can keep going with it”(21)</p> <p>“Providers who felt comfortable contacting one another through familiarity or “shared” patients (conditions) were sometimes described as “co-managing,” working together on CVD prevention”(21)</p>                                                                                                                                                                   | (21)                                 |
| Delegating responsibility to patients      | <p>“Our job is to advocate for nutrition change. Tell them about the risk if they continue eating the same way. Provide the literature and keep doing the tests. That is all we can do until the patient wants to take action. You could call us the influencers.”(23)</p> <p>"I control the information, the prescribing decision is shared, but whether or not they then purchase and take the medicines, I don't control that..."(20)</p> <p>"I don't consider myself having the right to demand that people stop smoking. I think it is presumptuous to make such strong demands."(20)</p>                                                                                                  | (20, 23, 28, 29, 34)                 |
| Providing holistic care                    | <p>“Few interviewed doctors reported that the provision of nutrition education was part of their medical role. These doctors used words such as ‘holistic’ and statements such as ‘we are carers for the total patient’ to describe this role.”(23)</p> <p>“Here, the doctor’s persuasive attitude towards the patient, creating a positive expectation, was considered important.”(20)</p> <p>“The doctor has the main responsibility, because he or she has the adequate skills and enjoys the patient’s confidence to make the decisions, and because the patients sometimes make themselves dependent and are unwilling to decide.”(20)</p>                                                 | (20, 23, 26, 29, 78)                 |
| <b>Trusting external expertise</b>         |                                                                                                                                                                                                                                                                                                                                                                                                                                                                                                                                                                                                                                                                                                 |                                      |
| Depending on credible evidence and opinion | <p>“I’m comfortable to be guided by the experts rather than try and invent too much on what might be dodgy assumptions on my part.”(25)</p> <p>“Firm trust in the scientific documentation of effectiveness for the individual and of cut-off points as true levels of increased predictable risk.”(20)</p> <p>“Some doubts about the effectiveness for the individual, but acceptance of the guidelines as rules to obey (even if they change over time), hoping and wishing that one is doing the best for the patient.”(20)</p> <p>“I think the strength of the absolute risk concept is that it improves the targeting of certain interventions, so that you have a greater</p>             | (20, 24, 25, 29, 34, 66, 67, 70, 78) |

|                                                  |                                                                                                                                                                                                                                                                                                                                                                                                                                                                                                                                                                                                                                                                                                                                                                    |                                                 |
|--------------------------------------------------|--------------------------------------------------------------------------------------------------------------------------------------------------------------------------------------------------------------------------------------------------------------------------------------------------------------------------------------------------------------------------------------------------------------------------------------------------------------------------------------------------------------------------------------------------------------------------------------------------------------------------------------------------------------------------------------------------------------------------------------------------------------------|-------------------------------------------------|
|                                                  | accuracy when you're prescribing things like Statins but also a greater accuracy and confidence when you prescribe just behavioral measures like diet and exercise..."(66)                                                                                                                                                                                                                                                                                                                                                                                                                                                                                                                                                                                         |                                                 |
| Entrusting care to other health professionals    | <p>"...doctors reported that the provision of nutrition care was outside their interest and expertise. These GPs described themselves as 'generalists' and viewed 'nutrition education as a specialty service'."(23)</p> <p>"[T]rained support staff to help us deal with these issues, who can sit down and speak with people about modification of lifestyle or risk factors. And who could then have follow-up for them also."(81)</p> <p>"If I got a letter from [a cardiologist] saying that 'we really find drug Y is superior in this situation' then that would influence me to use it."(78)</p> <p>"I can only do so much for this patient because I have 15 minutes ... so that team-based model... I think the program got that team approach."(26)</p> | (23, 26, 34, 67, 78, 80, 81)                    |
| Integrating into patient context                 | <p>"[AR assessment] doesn't take into account your family history, your weight, if you're active or not . . . when you've been in this game for as many years as I have you like to get a big picture."(25)</p> <p>"... you have to rely on your clinical gut feeling about that patient. Taking all the information that you have gathered to date, put it all together and compute it in your mind and then decide how hard you are going to chase each of these risk factors..."(71)</p> <p>"The role [of] multivitamins is very important, as diet [is] often inadequate, and [it is] very difficult to get this age group to change. In saying that I sent a very motivated 83 year old to [a] dietitian."(72)</p>                                            | (19-21, 25, 33, 34, 70-72, 76, 78, 79)          |
| <b>Motivating behavior change for prevention</b> |                                                                                                                                                                                                                                                                                                                                                                                                                                                                                                                                                                                                                                                                                                                                                                    |                                                 |
| Highlighting tangible improvements               | <p>"I'm trying to convince them that they're eating too much and not exercising enough and they're trying to convince me that they are...but the ones that take it on board and make progress...they feel positive... encouraged... rewarded...motivated to keep going."(27)</p> <p>"You want somehow to give them something positive to cling to... that if I can do this and that and I can stop smoking or I can go down in weight or if I can be a little more physically active, I will have lots to gain"(20)</p> <p>'... ive got one program where you can show the patient how the risk changes as you run the blood pressure down, or change the cholesterol. It's quite a powerful tool..."(71)</p>                                                      | (20, 27, 71)                                    |
| Negotiating patient acceptance                   | <p>"This is a partnership not a dictatorship so it has to be something that's on your agenda as well as mine."(27)</p> <p>"Three GPs had a 'negotiator' tendency, but the negotiations were mostly focused on lifestyle too: 'We insisted again on diet and exercise'(67)</p> <p>"Clearly the evidence around the world is that the primary care practitioner/patient relationship is the magic ingredient in the health system. There's continuity and there's trust. You get better outcomes and part of that is that people are more willing to commit to treatment plans. I think the General Practitioner's role is key in promoting adherence"(65)</p>                                                                                                       | (19, 20, 27, 28, 30, 31, 65-67, 71, 72, 74, 81) |
| Enabling autonomy and empowerment                | <p>"Reassuring people a bit and helping them to understand that they can control their risk factors either with or without medication and then I think that gives them a sense of empowerment, a bit of control."(27)</p> <p>"You've just got to allow people to make an informed decision and leave it up to them"(75)</p>                                                                                                                                                                                                                                                                                                                                                                                                                                        | (27, 75)                                        |
| Harnessing the power of fear                     | <p>"I am a hard master, I'm a very scary person...and I won't let you get away with things. But it's only because I care and because I want good things for you."(27)</p> <p>"I like to...put a little fear into them...if they don't 'pull up your socks' (sic) bad things can happen to them...if you don't want that kind of scenario you do what I tell you."(27)</p> <p>"...absolute risk charts and calculators were used by some GPs to 'scare' patients into taking action to reduce their risk of CVD, either through lifestyle change or medication."(27)</p>                                                                                                                                                                                            | (27, 31, 34, 82)                                |
| Disappointment with                              | "But then there are probably an equal number of patients from whom we give this advice and they never want to hear it in the first place,                                                                                                                                                                                                                                                                                                                                                                                                                                                                                                                                                                                                                          | (29)                                            |

1  
2  
3  
4  
5  
6  
7  
8  
9  
10  
11  
12  
13  
14  
15  
16  
17  
18  
19  
20  
21  
22  
23  
24  
25  
26  
27  
28  
29  
30  
31  
32  
33  
34  
35  
36  
37  
38  
39  
40  
41  
42  
43  
44  
45  
46  
47

|                                                     |                                                                                                                                                                                                                                                                                                                                                                                                                                                                                                                                                                                                                                                                                                                                                                                       |                                      |
|-----------------------------------------------------|---------------------------------------------------------------------------------------------------------------------------------------------------------------------------------------------------------------------------------------------------------------------------------------------------------------------------------------------------------------------------------------------------------------------------------------------------------------------------------------------------------------------------------------------------------------------------------------------------------------------------------------------------------------------------------------------------------------------------------------------------------------------------------------|--------------------------------------|
| futility of advice                                  | and having heard it they have no intention of doing anything about it . . . I am not convinced that we do as much good as we like to think we do. I am fairly depressed that what we do is probably a complete waste of time . . . are we really preventing disease by what we do?"(29)                                                                                                                                                                                                                                                                                                                                                                                                                                                                                               |                                      |
| <b>Recognizing and accepting patient capacities</b> |                                                                                                                                                                                                                                                                                                                                                                                                                                                                                                                                                                                                                                                                                                                                                                                       |                                      |
| Ascertaining patient's drive for lifestyle change   | <p>"They all want a pill (laughter) for everything and that's the main challenge we find . . . not many patients are willing to change their lifestyle unfortunately . . . they want the easy way out. A pill for everything."(33)</p> <p>"I try to have a discussion with people to find out how much they want to use lifestyle modification and I think in situations it is very important to have the patient try the lifestyle to see if it will work and then treat them, to give them the option... I try to determine their preferences"(22)</p> <p>"Trying to work out what barriers there are, so it means digging in a bit deeper into what makes this happen, what do you normally do, finding out more about their life and why they, what they can feasibly do"(30)</p> | (19, 22, 23, 30, 33, 66, 67)         |
| Conceding to ingrained habits                       | <p>"Because most patients you see in real life are elderly, and there you only find high levels, and you realize that you can give this advice about their lifestyle, but they will not be very effective on this person so you'd better prescribe pharmaceuticals"(20)</p> <p>"I think that in some circumstances you can be outstandingly effective, because I have had some patients who have done very well as a result of it. But I think in general terms it is very difficult to change people's established patterns of behavior"(29)</p>                                                                                                                                                                                                                                     | (20, 29, 30, 66)                     |
| Prioritizing urgent comorbidities                   | <p>"Other patients had more important problems than CVD risk, either acute conditions that dominated one-off consultations or competing chronic issues such as mental health. In these situations, absolute risk was often not assessed until the patient was ready to discuss CVD risk"(27)</p> <p>"Diabetic patients or hypertensive patients may already be on several medications already...and then if you are inflicting another tablet, then it's difficult and you are given the realms of polypharmacy. It can be very difficult and I am sure the compliance must drop considerably for such patients."(32)</p>                                                                                                                                                             | (21, 23, 27, 31, 32, 65, 69, 78, 81) |
| Tailoring to patient environment and literacy       | <p>" I think people with a higher education level are much more interested in perhaps in absolute figures and like to see the chart or the risk calculator and see how things can change. Whereas if you've got... someone who is less educated then you need to be a little bit more... simplistic in your description of risk and changing risk."(27)</p> <p>"The environment many of our patients live in is not conducive to making lifestyle behavioral changes...multiple fast food outlets, pavements may not be safe, lack of cycle ways etc."(31)</p> <p>"...prevention of CVD should be based on the reduction of RF through educational programmes that promote balanced diets, exercise and smoking cessation."(68)</p>                                                   | (19, 27, 29, 31, 68)                 |
| <b>Avoiding over-medicalization</b>                 |                                                                                                                                                                                                                                                                                                                                                                                                                                                                                                                                                                                                                                                                                                                                                                                       |                                      |
| Averting long-term dependence on medications        | <p>"Only that I think one of the most important things is this smoking cessation. I guess again because of the people I see, being young, that is what I hammer."(19)</p> <p>"...but there is a pharmaceutical industry that puts pressure on us, it's in newspapers etc, we are continually fed with this... and I think it is as much my duty to sit here and tone down the risks for the young ones, above all. It doesn't seem reasonable that the majority of the population should take medicines"(20)</p> <p>"Above all to give up smoking. That is the most important, as I see it..."(73)</p>                                                                                                                                                                                | (19, 20, 32, 34, 73, 79, 81)         |
| Preventing a false sense of security                | <p>"You cannot do one thing without the other . . . no use starting those tablets if you go overboard with the diet, I mean people say 'oh it doesn't matter, take the tablets I can do anything I like'. That's not true . . . you have to have a good diet as well as taking the tablets. The tablets alone is not going to fix everything."(33)</p> <p>"It also can encourage people to believe that they are immortal almost and that the drug is going to protect them and that is not actually</p>                                                                                                                                                                                                                                                                              | (20, 32, 33, 79, 81, 82)             |

|                                        |                                                                                                                                                                                                                                                                                                                                                                                                                                                                                                                                                                                                                                                                                                                                                                                                                                                                                                                                     |                                  |
|----------------------------------------|-------------------------------------------------------------------------------------------------------------------------------------------------------------------------------------------------------------------------------------------------------------------------------------------------------------------------------------------------------------------------------------------------------------------------------------------------------------------------------------------------------------------------------------------------------------------------------------------------------------------------------------------------------------------------------------------------------------------------------------------------------------------------------------------------------------------------------------------------------------------------------------------------------------------------------------|----------------------------------|
|                                        | what it does, and it may actually encourage people to take less responsibility for their own illness which again is not good.”(32)                                                                                                                                                                                                                                                                                                                                                                                                                                                                                                                                                                                                                                                                                                                                                                                                  |                                  |
| Minimizing stress of sickness          | <p>“If the patient was highly anxious about their health, they may interpret even a low risk as something to be concerned about.”(27)</p> <p>“Then of course there are patient factors ... medicalization of society, the philosophical thing really in that you are perfectly well until you go to the doctor and come out with high cholesterol. It’s a bit like treating asymptomatic hypertension.”(32)</p> <p>“We are putting fear into people in order to achieve objectives which we are being paid for. And we have created, as a profession, a very frightened population ... So I am skeptical”(29)</p>                                                                                                                                                                                                                                                                                                                   | (20, 24, 25, 29, 32, 34, 67, 73) |
| <b>Minimizing economic burdens</b>     |                                                                                                                                                                                                                                                                                                                                                                                                                                                                                                                                                                                                                                                                                                                                                                                                                                                                                                                                     |                                  |
| Avoiding unjustified costs to patients | <p>“From every point of view, from patient care, cost . . . if you can make the changes which have the least amount of cost to everyone then I think that’s usually lifestyle. So that’s usually the way that I start with and then use medication if we’re not getting there.”(33)</p> <p>“The down side for the practice is that it is expensive and it’s a lot of patients who will be on it for life. Once you start someone on it, it is for life, so it is expensive in terms of cost of drugs...”(32)</p> <p>“... it must be the medicines that did it, mustn't it, it saved lots of money, I think, it's costly intensive care, MI and stroke and those things”(20)</p>                                                                                                                                                                                                                                                     | (20, 22, 32, 33, 65, 73, 75)     |
| Delivering practice within budget      | <p>“I would only prescribe it if it doesn't count on my medication budget!”(74)</p> <p>“I think there is massive external pressures on us for every single thing we prescribe and I think the statins thing is rather bizarre in that we were heavily penalized for overspending on our drug budgets when we were spending heavily on statins, and we still have that pressure on drug budgets with negative budgets and target payments and all the rest of it”(32)</p> <p>“I think in terms of cost–benefit, it is an appropriate approach because people with an existing disease you are going to save lives and quality of life for less money spent in preventing. Primary prevention is going to be less cost-effective because the number of people you need to prescribe to prevent one event, so in that respect yes it is right, but whether it is right from an ethical point of view is difficult to answer.” (32)</p> | (19, 24, 31, 32, 68, 74)         |
| Alleviating healthcare expenses        | <p>“at the moment we don't have the resources to actually give the rehabilitation that we could do if we had the extra nurse time... we have the protocols, we have the expertise, but we don't have the nurse hours to take that on”(77)</p> <p>“It is time-consuming in terms of following up because people do need to be followed up and they do need to have blood tests” (32)</p>                                                                                                                                                                                                                                                                                                                                                                                                                                                                                                                                             | (29, 32, 77, 80)                 |

- 1        1    **List of supplementary files**
- 2
- 3        2
- 4
- 5        3    **Supplementary File 1. PRISMA checklist**
- 6
- 7        4    **Supplementary File 2. Search strategy**
- 8
- 9
- 10
- 11
- 12
- 13
- 14
- 15
- 16
- 17
- 18
- 19
- 20
- 21
- 22
- 23
- 24
- 25
- 26
- 27
- 28
- 29
- 30
- 31
- 32
- 33
- 34
- 35
- 36
- 37
- 38
- 39
- 40
- 41
- 42
- 43
- 44
- 45
- 46
- 47
- 48
- 49
- 50
- 51
- 52
- 53
- 54
- 55
- 56
- 57
- 58
- 59
- 60

For peer review only



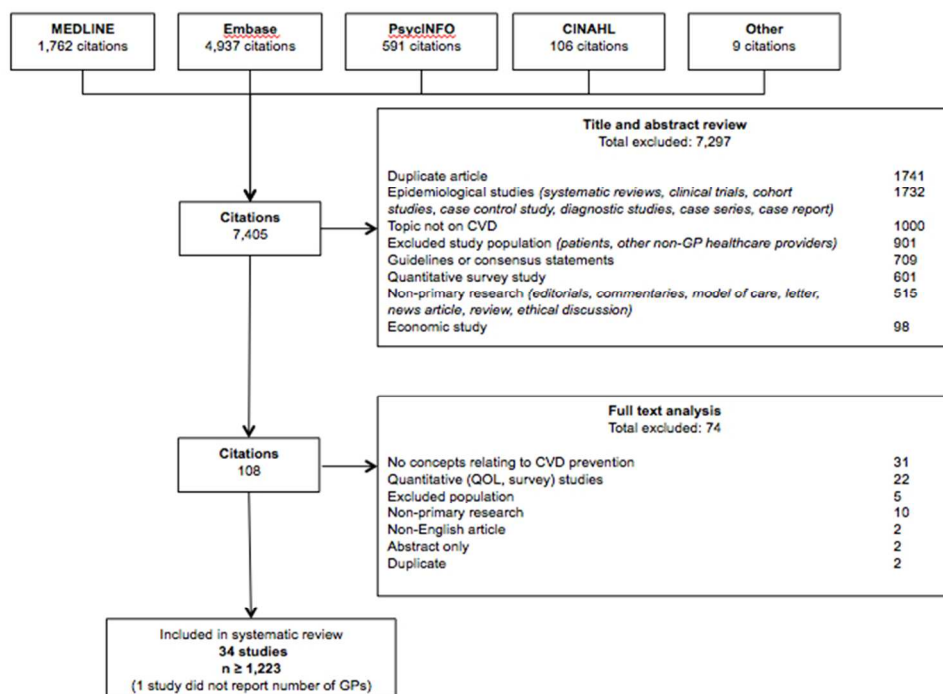

FIGURE 1

1  
2  
3  
4  
5  
6  
7  
8  
9  
10  
11  
12  
13  
14  
15  
16  
17  
18  
19  
20  
21  
22  
23  
24  
25  
26  
27  
28  
29  
30  
31  
32  
33  
34  
35  
36  
37  
38  
39  
40  
41  
42  
43  
44  
45  
46  
47  
48  
49  
50  
51  
52  
53  
54  
55  
56  
57  
58  
59  
60

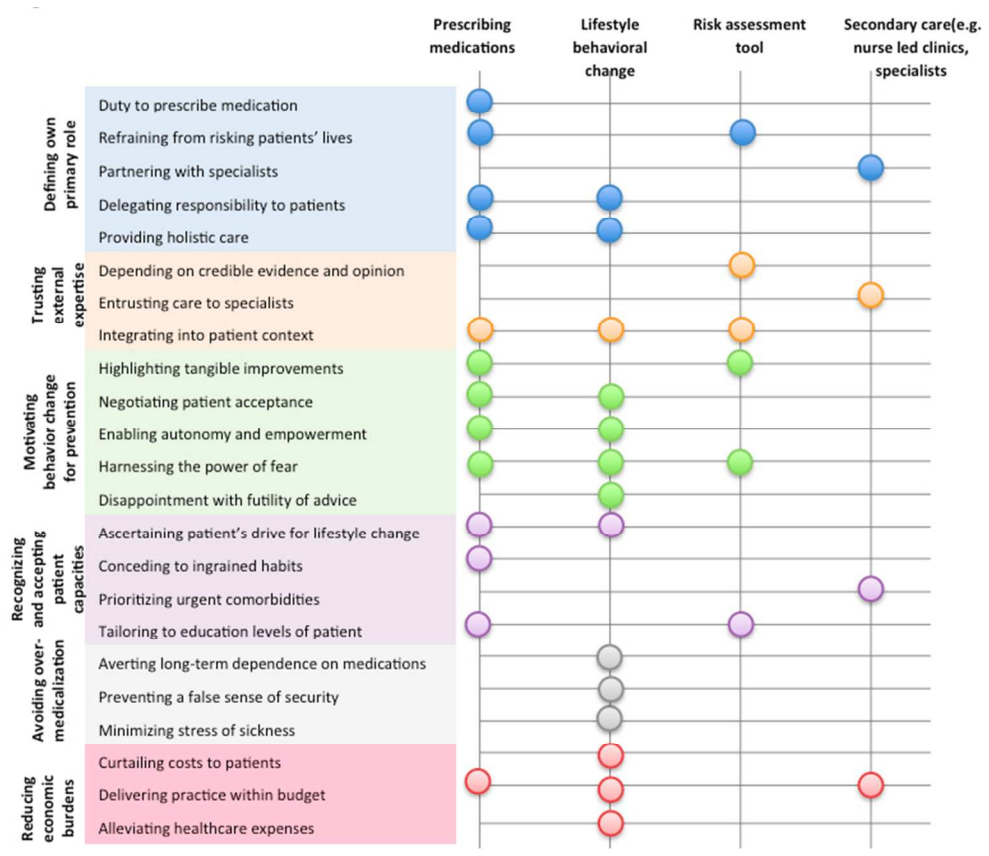

FIGURE 2

www.bmj.com

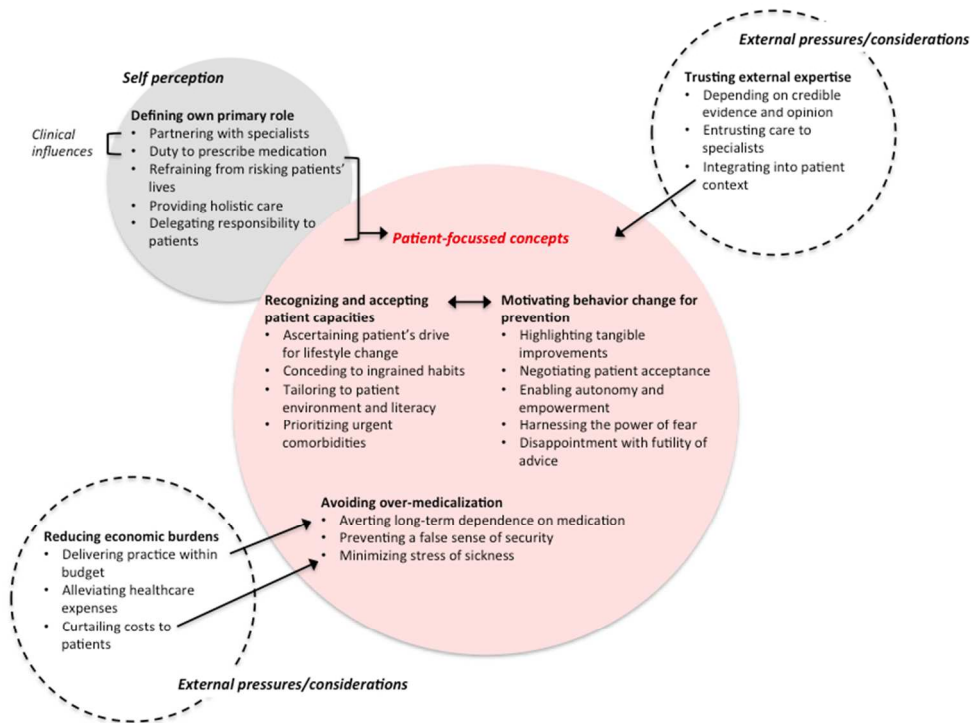

FIGURE 3

Supplementary File 1. PRISMA checklist

1  
2  
3  
4  
5  
6  
7  
8  
9  
10  
11  
12  
13  
14  
15  
16  
17  
18  
19  
20  
21  
22  
23  
24  
25  
26  
27  
28  
29  
30  
31  
32  
33  
34  
35  
36  
37  
38  
39  
40  
41  
42  
43  
44  
45  
46  
47

| Section/topic                      | #  | Checklist item                                                                                                                                                                                                                                                                                              | Reported on page # |
|------------------------------------|----|-------------------------------------------------------------------------------------------------------------------------------------------------------------------------------------------------------------------------------------------------------------------------------------------------------------|--------------------|
| <b>TITLE</b>                       |    |                                                                                                                                                                                                                                                                                                             |                    |
| Title                              | 1  | Identify the report as a systematic review, meta-analysis, or both.                                                                                                                                                                                                                                         | 1                  |
| <b>ABSTRACT</b>                    |    |                                                                                                                                                                                                                                                                                                             |                    |
| Structured summary                 | 2  | Provide a structured summary including, as applicable: background; objectives; data sources; study eligibility criteria, participants, and interventions; study appraisal and synthesis methods; results; limitations; conclusions and implications of key findings; systematic review registration number. | 2-3                |
| <b>INTRODUCTION</b>                |    |                                                                                                                                                                                                                                                                                                             |                    |
| Rationale                          | 3  | Describe the rationale for the review in the context of what is already known.                                                                                                                                                                                                                              | 4                  |
| Objectives                         | 4  | Provide an explicit statement of questions being addressed with reference to participants, interventions, comparisons, outcomes, and study design (PICOS).                                                                                                                                                  | N/A                |
| <b>METHODS</b>                     |    |                                                                                                                                                                                                                                                                                                             |                    |
| Protocol and registration          | 5  | Indicate if a review protocol exists, if and where it can be accessed (e.g., Web address), and, if available, provide registration information including registration number.                                                                                                                               | N/A                |
| Eligibility criteria               | 6  | Specify study characteristics (e.g., PICOS, length of follow-up) and report characteristics (e.g., years considered, language, publication status) used as criteria for eligibility, giving rationale.                                                                                                      | 5                  |
| Information sources                | 7  | Describe all information sources (e.g., databases with dates of coverage, contact with study authors to identify additional studies) in the search and date last searched.                                                                                                                                  | 5                  |
| Search                             | 8  | Present full electronic search strategy for at least one database, including any limits used, such that it could be repeated.                                                                                                                                                                               | 43-45              |
| Study selection                    | 9  | State the process for selecting studies (i.e., screening, eligibility, included in systematic review, and, if applicable, included in the meta-analysis).                                                                                                                                                   | 5                  |
| Data collection process            | 10 | Describe method of data extraction from reports (e.g., piloted forms, independently, in duplicate) and any processes for obtaining and confirming data from investigators.                                                                                                                                  | 5                  |
| Data items                         | 11 | List and define all variables for which data were sought (e.g., PICOS, funding sources) and any assumptions and simplifications made.                                                                                                                                                                       | N/A                |
| Risk of bias in individual studies | 12 | Describe methods used for assessing risk of bias of individual studies (including specification of whether this was done at the study or outcome level), and how this information is to be used in any data synthesis.                                                                                      | N/A                |
| Summary measures                   | 13 | State the principal summary measures (e.g., risk ratio, difference in means).                                                                                                                                                                                                                               | N/A                |
| Synthesis of results               | 14 | Describe the methods of handling data and combining results of studies, if done, including measures of consistency (e.g., I <sup>2</sup> ) for each meta-analysis.                                                                                                                                          | 6                  |

1  
2  
3  
4  
5  
6  
7  
8  
9  
10  
11  
12  
13  
14  
15  
16  
17  
18  
19  
20  
21  
22  
23  
24  
25  
26  
27  
28  
29  
30  
31  
32  
33  
34  
35  
36  
37  
38  
39  
40  
41  
42  
43  
44  
45  
46  
47

| Section/topic                 | #  | Checklist item                                                                                                                                                                                           | Reported on page # |
|-------------------------------|----|----------------------------------------------------------------------------------------------------------------------------------------------------------------------------------------------------------|--------------------|
| Risk of bias across studies   | 15 | Specify any assessment of risk of bias that may affect the cumulative evidence (e.g., publication bias, selective reporting within studies).                                                             | N/A                |
| Additional analyses           | 16 | Describe methods of additional analyses (e.g., sensitivity or subgroup analyses, meta-regression), if done, indicating which were pre-specified.                                                         | N/A                |
| <b>RESULTS</b>                |    |                                                                                                                                                                                                          |                    |
| Study selection               | 17 | Give numbers of studies screened, assessed for eligibility, and included in the review, with reasons for exclusions at each stage, ideally with a flow diagram.                                          | 6                  |
| Study characteristics         | 18 | For each study, present characteristics for which data were extracted (e.g., study size, PICOS, follow-up period) and provide the citations.                                                             | 28-30              |
| Risk of bias within studies   | 19 | Present data on risk of bias of each study and, if available, any outcome level assessment (see item 12).                                                                                                | N/A                |
| Results of individual studies | 20 | For all outcomes considered (benefits or harms), present, for each study: (a) simple summary data for each intervention group (b) effect estimates and confidence intervals, ideally with a forest plot. | N/A                |
| Synthesis of results          | 21 | Present results of each meta-analysis done, including confidence intervals and measures of consistency.                                                                                                  | N/A                |
| Risk of bias across studies   | 22 | Present results of any assessment of risk of bias across studies (see Item 15).                                                                                                                          | N/A                |
| Additional analysis           | 23 | Give results of additional analyses, if done (e.g., sensitivity or subgroup analyses, meta-regression [see Item 16]).                                                                                    | 39                 |
| <b>DISCUSSION</b>             |    |                                                                                                                                                                                                          |                    |
| Summary of evidence           | 24 | Summarize the main findings including the strength of evidence for each main outcome; consider their relevance to key groups (e.g., healthcare providers, users, and policy makers).                     | 14-17              |
| Limitations                   | 25 | Discuss limitations at study and outcome level (e.g., risk of bias), and at review-level (e.g., incomplete retrieval of identified research, reporting bias).                                            | 17-18              |
| Conclusions                   | 26 | Provide a general interpretation of the results in the context of other evidence, and implications for future research.                                                                                  | 18                 |
| <b>FUNDING</b>                |    |                                                                                                                                                                                                          |                    |
| Funding                       | 27 | Describe sources of funding for the systematic review and other support (e.g., supply of data); role of funders for the systematic review.                                                               | 19                 |

From: Moher D, Liberati A, Tetzlaff J, Altman DG, The PRISMA Group (2009). Preferred Reporting Items for Systematic Reviews and Meta-Analyses: The PRISMA Statement. PLoS Med 6(7): e1000097. doi:10.1371/journal.pmed1000097

For more information, visit: [www.prisma-statement.org](http://www.prisma-statement.org).

**Supplementary File 2. Search strategies****MEDLINE 1946 to April 18 2018****Searches**

- 1 exp General Practitioners/
- 2 general practi\$.tw.
- 3 or/1-2
- 4 exp Cardiovascular Diseases/
- 5 cardiovascular\$.tw.
- 6 Coronary Disease/
- 7 Coronary Disease\$.tw.
- 8 heart\$.tw.
- 9 cardiac\$.tw.
- 10 or/4-9
- 11 prevent\$.tw.
- 12 exp Secondary Prevention/ or exp Primary Prevention/
- 13 risk\$.tw.
- 14 rehabi\$.tw.
- 15 or/11-14
- 16 3 and 10 and 15
- 17 exp qualitative research/
- 18 qualitative.tw.
- 19 interview\$.tw.
- 20 focus group\$.tw.
- 21 (thematic\$ or theme\$).tw.
- 22 grounded theory.tw.
- 23 phenomenol\$.tw.
- 24 ethnograph\$.tw.
- 25 describ\$.tw.
- 26 (perspect\$ or percept\$ or attitud\$ or belie\$ or value\$ or view\$ or prefer\$).tw.
- 27 exp decision making/
- 28 exp Patient Care/
- 29 barrier\$.tw.
- 30 exp "Attitude of Health Personnel"/
- 31 or/17-30
- 32 16 and 31

**EMBASE 1980 to April 18 2018****Searches**

- 1 exp general practitioner/
- 2 general practi\$.tw.
- 3 or/1-2
- 4 exp Cardiovascular Diseases/
- 5 cardiovascular\$.tw.
- 6 exp coronary artery disease/
- 7 coronary disease\$.tw.
- 8 heart\$.tw.
- 9 cardiac\$.tw.
- 10 or/4-9
- 11 prevent\$.tw.
- 12 exp primary prevention/ or exp prevention study/ or exp secondary prevention/ or exp prevention/
- 13 risk\$.tw.
- 14 rehabi\$.tw.
- 15 or/11-14
- 16 3 and 10 and 15
- 17 exp qualitative research/
- 18 qualitative.tw.
- 19 interview\$.tw.
- 20 focus group\$.tw.
- 21 (thematic\$ or theme\$).tw.
- 22 grounded theory.tw.
- 23 phenomenol\$.tw.
- 24 ethnograph\$.tw.
- 25 describ\$.tw.
- 26 (perspect\$ or percept\$ or attitud\$ or belie\$ or value\$ or view\$ or prefer\$).tw.
- 27 exp decision making/
- 28 exp patient care/
- 29 barrier\$.tw.
- 30 exp health personnel attitude/
- 31 or/17-30
- 32 16 and 31

**PsycINFO 1806 to April 18 2018**

# ▲

**Searches**

- 1 exp General Practitioners/
- 2 general practi\$.tw.
- 3 or/1-2
- 4 exp Cardiovascular Disorders/
- 5 cardiovascular\$.tw.
- 6 exp Heart Disorders/ or exp Myocardial Infarctions/
- 7 coronary disease\$.tw.
- 8 heart\$.tw.
- 9 cardiac\$.tw.
- 10 or/5-9
- 11 3 and 10

**CINAHL**

- |    |                                                                                    |
|----|------------------------------------------------------------------------------------|
| S5 | S2 OR S3 OR S4                                                                     |
| S4 | (MH "Heart Diseases+")                                                             |
| S3 | (MM "Coronary Disease+") OR "Coronary Disease" OR (MM "Coronary Arteriosclerosis") |
| S2 | (MM "Cardiovascular Diseases+")                                                    |
| S1 | (MM "Physicians, Family")                                                          |
