# Supplementary material for: General practitioners’ perspectives on the prevention of cardiovascular disease: systematic review and thematic synthesis of qualitative studies
Source: PubMed Central journal article supplement — BMJ Open. 2018 Nov 1;8(11):e021137. doi: 10.1136/bmjopen-2017-021137 (PMC6224770; doi:10.1136/bmjopen-2017-021137), 2018-11-01
Supplement: bmjopen-2017-021137supp002.pdf [file bmjopen-2017-021137supp002.pdf]

## Supplementary File 2. Search strategies

### MEDLINE 1946 to April 18 2018

#### Searches

- 1 exp General Practitioners/
- 2 general practi\$.tw.
- 3 or/1-2
- 4 exp Cardiovascular Diseases/
- 5 cardiovascular\$.tw.
- 6 Coronary Disease/
- 7 Coronary Disease\$.tw.
- 8 heart\$.tw.
- 9 cardiac\$.tw.
- 10 or/4-9
- 11 prevent\$.tw.
- 12 exp Secondary Prevention/ or exp Primary Prevention/
- 13 risk\$.tw.
- 14 rehabil\$.tw.
- 15 or/11-14
- 16 3 and 10 and 15
- 17 exp qualitative research/
- 18 qualitative.tw.
- 19 interview\$.tw.
- 20 focus group\$.tw.
- 21 (thematic\$ or theme\$).tw.
- 22 grounded theory.tw.
- 23 phenomenol\$.tw.
- 24 ethnograph\$.tw.
- 25 describ\$.tw.
- 26 (perspect\$ or percept\$ or attitud\$ or belie\$ or value\$ or view\$ or prefer\$).tw.
- 27 exp decision making/
- 28 exp Patient Care/
- 29 barrier\$.tw.
- 30 exp "Attitude of Health Personnel"/
- 31 or/17-30
- 32 16 and 31

## EMBASE 1980 to April 18 2018

### Searches

- 1 exp general practitioner/
- 2 general practi\$.tw.
- 3 or/1-2
- 4 exp Cardiovascular Diseases/
- 5 cardiovascular\$.tw.
- 6 exp coronary artery disease/
- 7 coronary disease\$.tw.
- 8 heart\$.tw.
- 9 cardiac\$.tw.
- 10 or/4-9
- 11 prevent\$.tw.
- 12 exp primary prevention/ or exp prevention study/ or exp secondary prevention/ or exp prevention/
- 13 risk\$.tw.
- 14 rehabi\$.tw.
- 15 or/11-14
- 16 3 and 10 and 15
- 17 exp qualitative research/
- 18 qualitative.tw.
- 19 interview\$.tw.
- 20 focus group\$.tw.
- 21 (thematic\$ or theme\$).tw.
- 22 grounded theory.tw.
- 23 phenomenol\$.tw.
- 24 ethnograph\$.tw.
- 25 describ\$.tw.
- 26 (perspect\$ or percept\$ or attitud\$ or belie\$ or value\$ or view\$ or prefer\$).tw.
- 27 exp decision making/
- 28 exp patient care/
- 29 barrier\$.tw.
- 30 exp health personnel attitude/
- 31 or/17-30
- 32 16 and 31

## PsycINFO 1806 to April 18 2018

# ▲

## Searches

- 1 exp General Practitioners/
- 2 general practi\$.tw.
- 3 or/1-2
- 4 exp Cardiovascular Disorders/
- 5 cardiovascular\$.tw.
- 6 exp Heart Disorders/ or exp Myocardial Infarctions/
- 7 coronary disease\$.tw.
- 8 heart\$.tw.
- 9 cardiac\$.tw.
- 10 or/5-9
- 11 3 and 10

## CINAHL

- |    |                                                                                    |
|----|------------------------------------------------------------------------------------|
| S5 | S2 OR S3 OR S4                                                                     |
| S4 | (MH "Heart Diseases+")                                                             |
| S3 | (MM "Coronary Disease+") OR "Coronary Disease" OR (MM "Coronary Arteriosclerosis") |
| S2 | (MM "Cardiovascular Diseases+")                                                    |
| S1 | (MM "Physicians, Family")                                                          |
